# Supplementary material for: Identification of DNA Methylation Changes in Newborns Related to Maternal Smoking during Pregnancy
Source: PubMed Central journal article supplement (PMC4181928; doi:10.1289/ehp.1307892), 2014-06-06
Supplement: ehp.1307892.s001.508.pdf [file ehp.1307892.s001.508.pdf]

## **Supplemental Material**

### **Identification of DNA Methylation Changes in Newborns Related to Maternal Smoking during Pregnancy**

Christina A. Markunas, Zongli Xu, Sophia Harlid, Paul A. Wade, Rolv T. Lie, Jack A. Taylor, and Allen J. Wilcox

| <b>Table of Contents</b>                                                                                                | <b>Page</b> |
|-------------------------------------------------------------------------------------------------------------------------|-------------|
| <b>Methods</b>                                                                                                          | 3           |
| Data generation                                                                                                         | 3           |
| Data cleaning and quality assessment                                                                                    | 3           |
| Data pre-processing                                                                                                     | 4           |
| <b>Supplemental tables</b>                                                                                              | 6           |
| <b>Table S1.</b> Newborn cell proportion estimates (mean $\pm$ SD) according to maternal smoking (non-active or active) | 6           |
| <b>Table S2.</b> Genome-wide significant CpG sites: comparison of Model1 and Model2                                     | 7           |
| <b>Table S3.</b> CpG probe annotation                                                                                   | 15          |
| <b>Table S4.</b> CpG probe annotation                                                                                   | 23          |
| <b>Table S5.</b> Distribution of differentially methylated CpG sites by genomic region [n (%)]                          | 31          |
| <b>Table S6.</b> Genome-wide significant CpG sites: dose-response evaluation by maternal smoking status                 | 32          |
| <b>Table S7.</b> Percentage of CpGs showing a dose-response relationship                                                | 40          |
| <b>Table S8.</b> Genome-wide significant CpG sites: replication using previously published studies                      | 41          |
| <b>Table S9.</b> Technical replicate assessment                                                                         | 47          |
| <b>Supplemental figures</b>                                                                                             | 48          |
| <b>Figure S1.</b> Volcano plot                                                                                          | 48          |

|                                                                                              |    |
|----------------------------------------------------------------------------------------------|----|
| <b>Figure S2.</b> Quantile-quantile (Q-Q)                                                    | 49 |
| <b>Figure S3.</b> Comparison of results from Model1 and Model2                               | 50 |
| <b>Figure S4.</b> Genome-wide significant CpG sites that showed a dose-response relationship | 51 |
| <b>Figure S5.</b> MEG3 gene diagram                                                          | 52 |
| <b>References</b>                                                                            | 53 |

## **Methods**

### **Data generation**

Genomic DNA was extracted from whole blood using the automated Autopure LS system (Gentra, Minneapolis, MN). Extracted DNA was quantified using Quant-iT<sup>TM</sup> PicoGreen dsDNA reagents (Invitrogen, Grand Island, NY) and stored at -20°C. One microgram of DNA was bisulfite converted using the EZ DNA Methylation kit (Zymo Research, Irvine, CA) following the manufacturer's protocol. In total, 898 newborn and 60 technical control samples (replicates and samples with varying levels of known DNA methylation) were run on Illumina HumanMethylation450 BeadChips (San Diego, CA) according to the manufacturer's instructions at the NIH Center for Inherited Disease Research. The Illumina HumanMethylation450 BeadChip contains 485,577 CpG sites which cover 99% of RefSeq genes and 96% of CpG islands.

### **Data cleaning and quality assessment**

Samples were excluded if determined to be outliers based on visual inspection of a density plot using raw  $\beta$ -values (ratio of methylated to total signal), if less than 95% of CpG probes were detectable (Illumina detection p-value < 0.05), or if sex was ambiguous. In total, six samples were excluded due to poor performance based on Illumina's bisulfite conversion system controls (intensity value < 5500), one sample was excluded as a clear outlier in the raw  $\beta$ -value density plot, one sample was excluded due to ambiguous sex plus poor bisulfite conversion efficiency, and one sample was excluded as the mother was a snuff tobacco user. These exclusions left 889 samples for analysis ( $N_{\text{smokers}}=287$ ,  $N_{\text{non-smokers}}=602$ ). We also conducted filtering of CpG probes. To avoid altered methylation measures due to SNPs, 20,869 CpG probes were excluded with SNPs present at their target site (Price et al. 2013). Furthermore, CpGs on sex chromosomes

were excluded and a non-specific filtering step was applied to exclude the least variable 20% of CpG probes as determined by the interquartile range of methylation  $\beta$ -values. After exclusion of these probes, a total of 357,320 CpGs remained for the association analysis. Additionally, to reduce the effect of outliers for each CpG probe,  $\beta$ -values that were more than 3 standard deviations from the mean were excluded. In addition, methylation levels that were deemed undetectable (Illumina detection p-value > 0.05) were excluded. Further data assessment was conducted by examining the correlation within the 20 duplicate sample pairs (Table S9).

### **Data pre-processing**

Raw intensity data were obtained using the Illumina GenomeStudio methylation module (version 2011.1). At each CpG site on the array, methylation status was determined based on intensity measures corresponding to unmethylated (U) or methylated (M) signal. The Illumina HumanMethylation450 BeadChip contains two probe types: Infinium Type I (2 probe types, 1 color channel) and II (1 probe type, 2 color channels). As the Type II probes use two color channels to assess methylation, dye bias was corrected using the normalization function (normalizeMethyLumiSet), provided in the R package, methylumi (Davis et al. 2013). Before association analysis, the M and U intensity values for Type I and II probes were separately background adjusted (4 separate groups) using the robust multi-array average (RMA) method (Irizarry et al. 2003) and quantile normalized using the normalization function (normalize.quantiles), provided in the R package, Affy (Bolstad et al. 2003). The  $\beta$ -value ( $M/(M+U+100)$ ) was then computed and used in the association analysis. Prior to running the robust linear regression model, residuals were calculated for each CpG probe from linear regression models adjusting for infant's sex, and two technical factors: batch (96-well plate) and bisulfite efficiency. Missing  $\beta$ -values generated due to the exclusion of outliers (see above for

description) were first imputed using the KNN method (10 nearest markers) as implemented in the R package, impute (Hastie et al. 2014). Following adjustment of the data for technical factors and sex, outliers were re-set to missing and residuals were used as input for the primary analysis. Additional covariates thought to be potential confounders (e.g. facial cleft status) were included in the robust linear regression model, along with maternal smoking status, as described in the methods section (Analysis) of the main manuscript.

## Supplemental tables

**Table S1.** Newborn cell proportion estimates (mean  $\pm$  SD) according to maternal smoking (non-active or active)

| <b>Cell subtype<sup>a</sup></b> | <b>Non-active<sup>b</sup></b> | <b>Active<sup>b</sup></b> | <b>P-value<sup>c</sup></b> |
|---------------------------------|-------------------------------|---------------------------|----------------------------|
| T-cells                         | 0.49 $\pm$ 0.11               | 0.49 $\pm$ 0.11           | 0.36                       |
| Granulocytes                    | 0.31 $\pm$ 0.12               | 0.31 $\pm$ 0.11           | 0.48                       |
| Monocytes                       | 0.10 $\pm$ 0.06               | 0.09 $\pm$ 0.06           | 0.73                       |
| B cells                         | 0.09 $\pm$ 0.04               | 0.09 $\pm$ 0.04           | 0.70                       |
| NK cells                        | 0.02 $\pm$ 0.04               | 0.02 $\pm$ 0.05           | 0.83                       |

<sup>a</sup>5 different cell type proportions were estimated using dataset, GSE35069. <sup>b</sup>Cell proportion estimates were normalized to equal 1.

<sup>c</sup>Based on a linear mixed model adjusted for sex and cleft status as fixed effects and BeadChip as a random effect.

**Table S2.** Genome-wide significant CpG sites: comparison of Model1 and Model2.<sup>a</sup>

| <b>Probe</b> | <b>Model1<sup>b</sup><br/>Coeff</b> | <b>Model1<sup>b</sup><br/>P-value</b> | <b>Model1<sup>b</sup><br/>q-value</b> | <b>Model2<sup>c</sup><br/>Coeff</b> | <b>Model2<sup>c</sup><br/>P-value</b> | <b>Model2<sup>c</sup><br/>q-value</b> | <b>Δ β-value<sup>d</sup></b> |
|--------------|-------------------------------------|---------------------------------------|---------------------------------------|-------------------------------------|---------------------------------------|---------------------------------------|------------------------------|
| cg05575921   | -0.0460                             | 1.45E-69*                             | 5.17E-64                              | -0.0466                             | 6.67E-65*                             | 2.38E-59                              | -0.043                       |
| cg04180046   | 0.0510                              | 1.53E-40*                             | 2.73E-35                              | 0.0500                              | 5.08E-38*                             | 9.07E-33                              | 0.052                        |
| cg09935388   | -0.0860                             | 2.39E-34*                             | 2.85E-29                              | -0.0848                             | 9.36E-32*                             | 1.11E-26                              | -0.084                       |
| cg25949550   | -0.0200                             | 1.39E-31*                             | 1.24E-26                              | -0.0198                             | 7.15E-31*                             | 6.39E-26                              | -0.019                       |
| cg12876356   | -0.0690                             | 2.22E-31*                             | 1.59E-26                              | -0.0699                             | 4.49E-30*                             | 3.21E-25                              | -0.077                       |
| cg12803068   | 0.0530                              | 3.58E-31*                             | 2.13E-26                              | 0.0525                              | 1.22E-29*                             | 7.28E-25                              | 0.053                        |
| cg18146737   | -0.0650                             | 3.83E-30*                             | 1.96E-25                              | -0.0657                             | 5.46E-29*                             | 2.79E-24                              | -0.075                       |
| cg18316974   | -0.0330                             | 3.47E-29*                             | 1.55E-24                              | -0.0339                             | 3.72E-27*                             | 1.66E-22                              | -0.044                       |
| cg21161138   | -0.0190                             | 5.51E-26*                             | 2.19E-21                              | -0.0181                             | 2.00E-21*                             | 7.14E-17                              | -0.02                        |
| cg19089201   | 0.0170                              | 1.62E-23*                             | 5.79E-19                              | 0.0163                              | 2.22E-21*                             | 7.21E-17                              | 0.02                         |
| cg14179389   | -0.0680                             | 3.38E-23*                             | 1.10E-18                              | -0.0664                             | 2.75E-21*                             | 8.18E-17                              | -0.065                       |
| cg06338710   | -0.0230                             | 1.96E-21*                             | 5.83E-17                              | -0.0232                             | 9.38E-22*                             | 3.72E-17                              | -0.031                       |
| cg22937882   | 0.0130                              | 2.76E-21*                             | 7.58E-17                              | 0.0139                              | 7.93E-21*                             | 2.18E-16                              | 0.013                        |
| cg09662411   | -0.0340                             | 1.06E-19*                             | 2.69E-15                              | -0.0350                             | 3.77E-20*                             | 9.63E-16                              | -0.043                       |
| cg22132788   | 0.0150                              | 2.11E-19*                             | 5.04E-15                              | 0.0147                              | 6.92E-18*                             | 1.37E-13                              | 0.016                        |
| cg07339236   | -0.0130                             | 2.21E-18*                             | 4.94E-14                              | -0.0138                             | 7.28E-19*                             | 1.63E-14                              | -0.013                       |
| cg05549655   | 0.0320                              | 7.92E-18*                             | 1.66E-13                              | 0.0312                              | 6.58E-16*                             | 1.12E-11                              | 0.036                        |
| cg11924019   | 0.0290                              | 9.40E-18*                             | 1.87E-13                              | 0.0286                              | 6.99E-16*                             | 1.13E-11                              | 0.033                        |
| cg00253658   | 0.0590                              | 1.37E-17*                             | 2.57E-13                              | 0.0580                              | 8.60E-17*                             | 1.62E-12                              | 0.063                        |
| cg22549041   | 0.0590                              | 5.94E-17*                             | 1.06E-12                              | 0.0581                              | 9.64E-16*                             | 1.50E-11                              | 0.066                        |
| cg08606254   | 0.0200                              | 2.14E-15*                             | 3.65E-11                              | 0.0215                              | 2.36E-16*                             | 4.22E-12                              | 0.021                        |

| <b>Probe</b> | <b>Model1<sup>b</sup><br/>Coeff</b> | <b>Model1<sup>b</sup><br/>P-value</b> | <b>Model1<sup>b</sup><br/>q-value</b> | <b>Model2<sup>c</sup><br/>Coeff</b> | <b>Model2<sup>c</sup><br/>P-value</b> | <b>Model2<sup>c</sup><br/>q-value</b> | <b>Δ β-value<sup>d</sup></b> |
|--------------|-------------------------------------|---------------------------------------|---------------------------------------|-------------------------------------|---------------------------------------|---------------------------------------|------------------------------|
| cg25464840   | 0.0220                              | 3.15E-15*                             | 5.11E-11                              | 0.0262                              | 8.03E-20*                             | 1.91E-15                              | 0.023                        |
| cg12101586   | 0.0390                              | 5.38E-15*                             | 8.36E-11                              | 0.0393                              | 1.74E-13*                             | 2.49E-09                              | 0.043                        |
| cg15507334   | 0.0200                              | 2.43E-13*                             | 3.62E-09                              | 0.0238                              | 5.78E-18*                             | 1.22E-13                              | 0.022                        |
| cg26681628   | 0.0230                              | 4.05E-13*                             | 5.79E-09                              | 0.0224                              | 2.13E-13*                             | 2.93E-09                              | 0.023                        |
| cg18092474   | 0.0420                              | 5.47E-13*                             | 7.51E-09                              | 0.0425                              | 4.29E-12*                             | 5.11E-08                              | 0.05                         |
| cg23067299   | 0.0220                              | 8.94E-13*                             | 1.18E-08                              | 0.0249                              | 2.92E-14*                             | 4.35E-10                              | 0.022                        |
| cg13570656   | 0.0420                              | 9.63E-13*                             | 1.23E-08                              | 0.0417                              | 1.99E-11*                             | 2.04E-07                              | 0.044                        |
| cg11429111   | 0.0310                              | 1.04E-12*                             | 1.29E-08                              | 0.0315                              | 7.32E-12*                             | 8.18E-08                              | 0.034                        |
| cg01952185   | 0.0290                              | 2.55E-12*                             | 3.04E-08                              | 0.0309                              | 2.59E-12*                             | 3.30E-08                              | 0.031                        |
| cg18703066   | -0.0060                             | 7.63E-12*                             | 8.79E-08                              | -0.0059                             | 1.02E-09*                             | 9.09E-06                              | -0.004                       |
| cg11902777   | -0.0080                             | 1.13E-11*                             | 1.26E-07                              | -0.0087                             | 9.33E-12*                             | 1.01E-07                              | -0.009                       |
| cg18132363   | -0.0270                             | 8.92E-11*                             | 9.53E-07                              | -0.0272                             | 3.94E-10*                             | 3.70E-06                              | -0.029                       |
| cg15325070   | 0.0180                              | 9.07E-11*                             | 9.53E-07                              | 0.0188                              | 1.71E-10*                             | 1.70E-06                              | 0.018                        |
| cg10399789   | -0.0160                             | 5.74E-10*                             | 5.66E-06                              | -0.0177                             | 2.72E-12*                             | 3.35E-08                              | -0.02                        |
| cg14817490   | -0.0230                             | 5.75E-10*                             | 5.66E-06                              | -0.0248                             | 1.07E-12*                             | 1.42E-08                              | -0.021                       |
| cg01031101   | 0.0230                              | 5.86E-10*                             | 5.66E-06                              | 0.0237                              | 8.02E-10*                             | 7.34E-06                              | 0.026                        |
| cg26764244   | -0.0230                             | 6.68E-10*                             | 6.28E-06                              | -0.0233                             | 3.29E-10*                             | 3.18E-06                              | -0.023                       |
| cg00213123   | 0.0120                              | 7.47E-10*                             | 6.85E-06                              | 0.0116                              | 1.24E-08*                             | 8.87E-05                              | 0.014                        |
| cg03796381   | 0.0150                              | 1.17E-09*                             | 1.05E-05                              | 0.0136                              | 2.11E-07                              | 1.13E-03                              | 0.015                        |
| cg10520740   | -0.0090                             | 1.86E-09*                             | 1.62E-05                              | -0.0094                             | 1.92E-09*                             | 1.64E-05                              | -0.01                        |
| cg03144619   | -0.0370                             | 2.17E-09*                             | 1.85E-05                              | -0.0356                             | 4.24E-08*                             | 2.86E-04                              | -0.038                       |
| cg20344448   | 0.0150                              | 2.97E-09*                             | 2.47E-05                              | 0.0175                              | 5.32E-12*                             | 6.13E-08                              | 0.015                        |



| <b>Probe</b> | <b>Model1<sup>b</sup><br/>Coeff</b> | <b>Model1<sup>b</sup><br/>P-value</b> | <b>Model1<sup>b</sup><br/>q-value</b> | <b>Model2<sup>c</sup><br/>Coeff</b> | <b>Model2<sup>c</sup><br/>P-value</b> | <b>Model2<sup>c</sup><br/>q-value</b> | <b>Δ β-value<sup>d</sup></b> |
|--------------|-------------------------------------|---------------------------------------|---------------------------------------|-------------------------------------|---------------------------------------|---------------------------------------|------------------------------|
| cg01359532   | 0.0140                              | 3.11E-09*                             | 2.53E-05                              | 0.0149                              | 7.08E-09*                             | 5.49E-05                              | 0.015                        |
| cg10253847   | 0.0130                              | 6.51E-09*                             | 5.17E-05                              | 0.0132                              | 3.85E-08*                             | 2.65E-04                              | 0.015                        |
| cg11813497   | 0.0240                              | 6.85E-09*                             | 5.32E-05                              | 0.0277                              | 1.94E-11*                             | 2.04E-07                              | 0.029                        |
| cg25189904   | -0.0200                             | 9.06E-09*                             | 6.89E-05                              | -0.0208                             | 7.84E-09*                             | 5.72E-05                              | -0.018                       |
| cg24250902   | -0.0320                             | 1.13E-08*                             | 8.43E-05                              | -0.0322                             | 4.70E-08*                             | 3.00E-04                              | -0.031                       |
| cg13822849   | 0.0150                              | 1.18E-08*                             | 8.58E-05                              | 0.0161                              | 1.24E-09*                             | 1.08E-05                              | 0.015                        |
| cg23916896   | -0.0220                             | 1.24E-08*                             | 8.87E-05                              | -0.0212                             | 1.17E-07*                             | 6.88E-04                              | -0.022                       |
| cg13834112   | 0.0230                              | 1.46E-08*                             | 1.00E-04                              | 0.0247                              | 4.34E-09*                             | 3.52E-05                              | 0.029                        |
| cg26889659   | -0.0550                             | 1.46E-08*                             | 1.00E-04                              | -0.0506                             | 4.86E-07                              | 2.35E-03                              | -0.047                       |
| cg12806681   | -0.0090                             | 1.59E-08*                             | 1.07E-04                              | -0.0084                             | 4.28E-07                              | 2.13E-03                              | -0.008                       |
| cg05697274   | -0.0260                             | 1.75E-08*                             | 1.16E-04                              | -0.0253                             | 1.16E-07*                             | 6.88E-04                              | -0.024                       |
| cg18096987   | -0.0180                             | 4.10E-08*                             | 2.67E-04                              | -0.0173                             | 7.22E-09*                             | 5.49E-05                              | -0.013                       |
| cg10312186   | -0.0260                             | 4.40E-08*                             | 2.81E-04                              | -0.0245                             | 5.96E-07                              | 2.66E-03                              | -0.025                       |
| cg08097581   | -0.0110                             | 5.15E-08*                             | 3.21E-04                              | -0.0110                             | 7.52E-08*                             | 4.63E-04                              | -0.012                       |
| cg07104557   | -0.0140                             | 5.21E-08*                             | 3.21E-04                              | -0.0144                             | 4.57E-08*                             | 2.97E-04                              | -0.017                       |
| cg15578140   | 0.0140                              | 5.56E-08*                             | 3.32E-04                              | 0.0150                              | 7.57E-09*                             | 5.64E-05                              | 0.015                        |
| cg23335299   | 0.0250                              | 5.58E-08*                             | 3.32E-04                              | 0.0269                              | 5.90E-09*                             | 4.68E-05                              | 0.03                         |
| cg20244340   | -0.0170                             | 6.33E-08*                             | 3.71E-04                              | -0.0156                             | 1.71E-06                              | 5.94E-03                              | -0.015                       |
| cg04459939   | 0.0240                              | 6.91E-08*                             | 3.98E-04                              | 0.0278                              | 2.50E-09*                             | 2.08E-05                              | 0.029                        |
| cg18694169   | 0.0190                              | 9.62E-08*                             | 5.46E-04                              | 0.0188                              | 4.79E-07                              | 2.34E-03                              | 0.02                         |
| cg00589617   | -0.0290                             | 1.07E-07*                             | 5.89E-04                              | -0.0279                             | 1.38E-06                              | 5.18E-03                              | -0.029                       |
| cg04598670   | -0.0210                             | 1.07E-07*                             | 5.89E-04                              | -0.0183                             | 1.23E-05                              | 2.72E-02                              | -0.016                       |

| Probe      | Model1 <sup>b</sup><br>Coeff | Model1 <sup>b</sup><br>P-value | Model1 <sup>b</sup><br>q-value | Model2 <sup>c</sup><br>Coeff | Model2 <sup>c</sup><br>P-value | Model2 <sup>c</sup><br>q-value | $\Delta \beta$ -value <sup>d</sup> |
|------------|------------------------------|--------------------------------|--------------------------------|------------------------------|--------------------------------|--------------------------------|------------------------------------|
| cg24591105 | -0.0240                      | 1.26E-07*                      | 6.83E-04                       | -0.0227                      | 1.80E-06                       | 6.14E-03                       | -0.026                             |
| cg04098479 | 0.0040                       | 1.29E-07*                      | 6.89E-04                       | 0.0033                       | 1.75E-06                       | 6.01E-03                       | 0.003                              |
| cg03453449 | 0.0180                       | 1.31E-07*                      | 6.89E-04                       | 0.0191                       | 5.21E-08*                      | 3.26E-04                       | 0.017                              |
| cg09368188 | 0.0260                       | 1.54E-07                       | 7.95E-04                       | 0.0274                       | 1.30E-07*                      | 7.48E-04                       | 0.03                               |
| cg04291079 | 0.0130                       | 1.67E-07                       | 8.53E-04                       | 0.0139                       | 1.41E-07                       | 7.96E-04                       | 0.013                              |
| cg05568941 | 0.0150                       | 1.78E-07                       | 8.94E-04                       | 0.0175                       | 1.60E-08*                      | 1.12E-04                       | 0.019                              |
| cg04478905 | -0.0160                      | 1.96E-07                       | 9.70E-04                       | -0.0131                      | 2.86E-05                       | 4.77E-02                       | -0.013                             |
| cg15522425 | 0.0140                       | 2.36E-07                       | 1.16E-03                       | 0.0150                       | 4.45E-08*                      | 2.94E-04                       | 0.014                              |
| cg18621256 | -0.0140                      | 3.95E-07                       | 1.91E-03                       | -0.0132                      | 5.78E-06                       | 1.56E-02                       | -0.015                             |
| cg26954197 | 0.0070                       | 4.80E-07                       | 2.29E-03                       | 0.0072                       | 5.28E-07                       | 2.48E-03                       | 0.006                              |
| cg03991871 | -0.0090                      | 5.01E-07                       | 2.36E-03                       | -0.0090                      | 5.06E-06                       | 1.45E-02                       | -0.008                             |
| cg19631472 | -0.0120                      | 5.28E-07                       | 2.45E-03                       | -0.0119                      | 1.01E-06                       | 4.04E-03                       | -0.011                             |
| cg16459265 | -0.0100                      | 6.22E-07                       | 2.85E-03                       | -0.0081                      | 4.53E-05                       | 6.38E-02                       | -0.011                             |
| cg26119806 | -0.0170                      | 6.56E-07                       | 2.97E-03                       | -0.0149                      | 4.77E-05                       | 6.50E-02                       | -0.017                             |
| cg03177666 | 0.0170                       | 7.08E-07                       | 3.16E-03                       | 0.0172                       | 1.45E-06                       | 5.35E-03                       | 0.019                              |
| cg17852385 | 0.0230                       | 7.21E-07                       | 3.18E-03                       | 0.0228                       | 2.75E-06                       | 8.92E-03                       | 0.026                              |
| cg25632883 | -0.0360                      | 7.61E-07                       | 3.31E-03                       | -0.0405                      | 1.01E-07*                      | 6.09E-04                       | -0.035                             |
| cg20643029 | -0.0130                      | 7.70E-07                       | 3.31E-03                       | -0.0111                      | 3.39E-05                       | 5.28E-02                       | -0.013                             |
| cg00794911 | -0.0100                      | 8.10E-07                       | 3.45E-03                       | -0.0092                      | 2.54E-05                       | 4.44E-02                       | -0.011                             |
| cg02892925 | 0.0200                       | 8.48E-07                       | 3.56E-03                       | 0.0189                       | 1.78E-05                       | 3.59E-02                       | 0.018                              |
| cg09523275 | 0.0180                       | 8.79E-07                       | 3.65E-03                       | 0.0175                       | 3.47E-06                       | 1.06E-02                       | 0.022                              |
| cg17924476 | 0.0170                       | 9.38E-07                       | 3.85E-03                       | 0.0192                       | 1.43E-07                       | 7.96E-04                       | 0.02                               |
| cg15836046 | 0.0060                       | 1.03E-06                       | 4.19E-03                       | 0.0064                       | 5.86E-07                       | 2.65E-03                       | 0.005                              |
| cg12426652 | -0.0090                      | 1.18E-06                       | 4.73E-03                       | -0.0077                      | 6.04E-05                       | 7.40E-02                       | -0.007                             |
| cg26516004 | 0.0080                       | 1.20E-06                       | 4.77E-03                       | 0.0083                       | 1.29E-06                       | 4.90E-03                       | 0.009                              |

| <b>Probe</b> | <b>Model1<sup>b</sup><br/>Coeff</b> | <b>Model1<sup>b</sup><br/>P-value</b> | <b>Model1<sup>b</sup><br/>q-value</b> | <b>Model2<sup>c</sup><br/>Coeff</b> | <b>Model2<sup>c</sup><br/>P-value</b> | <b>Model2<sup>c</sup><br/>q-value</b> | <b>Δ β-value<sup>d</sup></b> |
|--------------|-------------------------------------|---------------------------------------|---------------------------------------|-------------------------------------|---------------------------------------|---------------------------------------|------------------------------|
| cg08626436   | 0.0320                              | 1.57E-06                              | 6.15E-03                              | 0.0347                              | 9.02E-07                              | 3.70E-03                              | 0.038                        |
| cg18753646   | -0.0220                             | 1.60E-06                              | 6.22E-03                              | -0.0211                             | 6.27E-06                              | 1.65E-02                              | -0.019                       |
| cg07211044   | 0.0230                              | 1.65E-06                              | 6.32E-03                              | 0.0212                              | 3.03E-05                              | 4.91E-02                              | 0.025                        |
| cg23664708   | -0.0170                             | 1.70E-06                              | 6.35E-03                              | -0.0165                             | 3.11E-06                              | 9.83E-03                              | -0.013                       |
| cg09743950   | -0.0160                             | 1.71E-06                              | 6.35E-03                              | -0.0127                             | 2.25E-04                              | 1.55E-01                              | -0.016                       |
| cg18675097   | 0.0280                              | 1.71E-06                              | 6.35E-03                              | 0.0277                              | 3.15E-06                              | 9.83E-03                              | 0.032                        |
| cg26652413   | 0.0110                              | 1.94E-06                              | 7.16E-03                              | 0.0119                              | 4.02E-07                              | 2.02E-03                              | 0.013                        |
| cg18722086   | 0.0060                              | 2.40E-06                              | 8.68E-03                              | 0.0047                              | 8.36E-05                              | 8.89E-02                              | 0.005                        |
| cg01825213   | 0.0200                              | 2.41E-06                              | 8.68E-03                              | 0.0222                              | 9.27E-07                              | 3.77E-03                              | 0.019                        |
| cg25383593   | 0.0120                              | 2.56E-06                              | 9.09E-03                              | 0.0113                              | 1.51E-05                              | 3.20E-02                              | 0.013                        |
| cg20816361   | 0.0160                              | 2.60E-06                              | 9.09E-03                              | 0.0175                              | 1.24E-06                              | 4.77E-03                              | 0.015                        |
| cg10078511   | 0.0130                              | 2.61E-06                              | 9.09E-03                              | 0.0140                              | 1.57E-06                              | 5.61E-03                              | 0.013                        |
| cg06813382   | 0.0180                              | 2.62E-06                              | 9.09E-03                              | 0.0187                              | 2.56E-06                              | 8.38E-03                              | 0.019                        |
| cg06415891   | 0.0190                              | 2.74E-06                              | 9.41E-03                              | 0.0208                              | 1.14E-06                              | 4.42E-03                              | 0.018                        |
| cg17442776   | 0.0090                              | 3.14E-06                              | 1.06E-02                              | 0.0104                              | 8.25E-07                              | 3.43E-03                              | 0.008                        |
| cg23849826   | 0.0090                              | 3.16E-06                              | 1.06E-02                              | 0.0103                              | 6.28E-07                              | 2.73E-03                              | 0.01                         |
| cg08026735   | 0.0120                              | 3.16E-06                              | 1.06E-02                              | 0.0117                              | 8.56E-06                              | 2.07E-02                              | 0.012                        |
| cg11625488   | -0.0220                             | 3.70E-06                              | 1.22E-02                              | -0.0229                             | 8.24E-06                              | 2.05E-02                              | -0.019                       |
| cg10841124   | 0.0040                              | 3.79E-06                              | 1.24E-02                              | 0.0043                              | 5.67E-06                              | 1.55E-02                              | 0.005                        |
| cg12937151   | -0.0280                             | 3.89E-06                              | 1.26E-02                              | -0.0259                             | 4.46E-05                              | 6.38E-02                              | -0.026                       |
| cg16547579   | -0.0160                             | 3.94E-06                              | 1.27E-02                              | -0.0124                             | 7.35E-05                              | 8.36E-02                              | -0.012                       |
| cg11096905   | -0.0160                             | 4.15E-06                              | 1.32E-02                              | -0.0142                             | 4.86E-05                              | 6.53E-02                              | -0.015                       |
| cg24698536   | -0.0260                             | 4.22E-06                              | 1.34E-02                              | -0.0257                             | 1.16E-05                              | 2.59E-02                              | -0.022                       |
| cg24239148   | 0.0070                              | 4.69E-06                              | 1.47E-02                              | 0.0072                              | 1.40E-05                              | 2.99E-02                              | 0.007                        |
| cg10673740   | 0.0190                              | 5.08E-06                              | 1.58E-02                              | 0.0171                              | 5.98E-05                              | 7.37E-02                              | 0.021                        |
| cg22057874   | 0.0130                              | 5.25E-06                              | 1.62E-02                              | 0.0103                              | 4.13E-05                              | 6.07E-02                              | 0.013                        |
| cg04640109   | 0.0110                              | 5.43E-06                              | 1.66E-02                              | 0.0116                              | 1.55E-06                              | 5.60E-03                              | 0.013                        |

| Probe      | Model1 <sup>b</sup><br>Coeff | Model1 <sup>b</sup><br>P-value | Model1 <sup>b</sup><br>q-value | Model2 <sup>c</sup><br>Coeff | Model2 <sup>c</sup><br>P-value | Model2 <sup>c</sup><br>q-value | $\Delta \beta$ -value <sup>d</sup> |
|------------|------------------------------|--------------------------------|--------------------------------|------------------------------|--------------------------------|--------------------------------|------------------------------------|
| cg12492906 | -0.0200                      | 5.87E-06                       | 1.78E-02                       | -0.0199                      | 8.29E-06                       | 2.05E-02                       | -0.02                              |
| cg11641006 | 0.0160                       | 5.92E-06                       | 1.78E-02                       | 0.0172                       | 3.39E-07                       | 1.76E-03                       | 0.014                              |
| cg11868728 | 0.0090                       | 6.03E-06                       | 1.80E-02                       | 0.0094                       | 4.27E-06                       | 1.25E-02                       | 0.007                              |
| cg16517298 | -0.0270                      | 6.09E-06                       | 1.80E-02                       | -0.0261                      | 7.86E-07                       | 3.30E-03                       | -0.027                             |
| cg05593775 | 0.0160                       | 6.18E-06                       | 1.81E-02                       | 0.0171                       | 9.34E-06                       | 2.20E-02                       | 0.022                              |
| cg03354508 | 0.0110                       | 6.85E-06                       | 1.98E-02                       | 0.0116                       | 5.46E-06                       | 1.54E-02                       | 0.01                               |
| cg24173182 | 0.0220                       | 6.86E-06                       | 1.98E-02                       | 0.0192                       | 1.10E-04                       | 1.07E-01                       | 0.024                              |
| cg13784312 | -0.0160                      | 7.22E-06                       | 2.06E-02                       | -0.0184                      | 1.66E-06                       | 5.82E-03                       | -0.02                              |
| cg26554302 | 0.0140                       | 7.27E-06                       | 2.06E-02                       | 0.0126                       | 6.99E-05                       | 8.06E-02                       | 0.02                               |
| cg22043296 | -0.0120                      | 7.42E-06                       | 2.09E-02                       | -0.0107                      | 1.28E-05                       | 2.82E-02                       | -0.016                             |
| cg04800195 | 0.0030                       | 7.56E-06                       | 2.11E-02                       | 0.0030                       | 1.12E-04                       | 1.09E-01                       | 0.003                              |
| cg07249149 | -0.0130                      | 7.62E-06                       | 2.11E-02                       | -0.0141                      | 5.61E-06                       | 1.55E-02                       | -0.015                             |
| cg15963463 | -0.0110                      | 7.69E-06                       | 2.11E-02                       | -0.0101                      | 5.95E-05                       | 7.36E-02                       | -0.008                             |
| cg14086013 | 0.0120                       | 7.74E-06                       | 2.11E-02                       | 0.0141                       | 1.13E-06                       | 4.42E-03                       | 0.015                              |
| cg02010738 | -0.0200                      | 8.13E-06                       | 2.20E-02                       | -0.0221                      | 5.76E-07                       | 2.64E-03                       | -0.019                             |
| cg18794473 | 0.0040                       | 8.61E-06                       | 2.30E-02                       | 0.0039                       | 6.40E-05                       | 7.68E-02                       | 0.003                              |
| cg26804595 | -0.0100                      | 8.61E-06                       | 2.30E-02                       | -0.0102                      | 8.51E-06                       | 2.07E-02                       | -0.008                             |
| cg14027333 | -0.0050                      | 8.76E-06                       | 2.32E-02                       | -0.0047                      | 2.78E-05                       | 4.69E-02                       | -0.004                             |
| cg02356218 | -0.0140                      | 9.03E-06                       | 2.37E-02                       | -0.0126                      | 6.51E-05                       | 7.75E-02                       | -0.013                             |
| cg14349977 | -0.0220                      | 9.09E-06                       | 2.37E-02                       | -0.0209                      | 7.78E-05                       | 8.66E-02                       | -0.021                             |
| cg09063262 | -0.0220                      | 9.37E-06                       | 2.41E-02                       | -0.0198                      | 1.83E-04                       | 1.37E-01                       | -0.021                             |
| cg26441486 | -0.0180                      | 9.38E-06                       | 2.41E-02                       | -0.0161                      | 6.49E-05                       | 7.75E-02                       | -0.019                             |
| cg00029284 | -0.0090                      | 9.62E-06                       | 2.46E-02                       | -0.0081                      | 1.01E-04                       | 1.00E-01                       | -0.009                             |
| cg12160087 | -0.0100                      | 1.14E-05                       | 2.88E-02                       | -0.0088                      | 1.64E-04                       | 1.29E-01                       | -0.01                              |
| cg19727396 | -0.0180                      | 1.15E-05                       | 2.88E-02                       | -0.0172                      | 3.58E-05                       | 5.53E-02                       | -0.02                              |
| cg06949812 | 0.0130                       | 1.20E-05                       | 3.00E-02                       | 0.0154                       | 6.20E-07                       | 2.73E-03                       | 0.015                              |
| cg26103179 | -0.0150                      | 1.32E-05                       | 3.27E-02                       | -0.0147                      | 3.96E-05                       | 5.87E-02                       | -0.012                             |

| <b>Probe</b> | <b>Model1<sup>b</sup><br/>Coeff</b> | <b>Model1<sup>b</sup><br/>P-value</b> | <b>Model1<sup>b</sup><br/>q-value</b> | <b>Model2<sup>c</sup><br/>Coeff</b> | <b>Model2<sup>c</sup><br/>P-value</b> | <b>Model2<sup>c</sup><br/>q-value</b> | <b>Δ β-value<sup>d</sup></b> |
|--------------|-------------------------------------|---------------------------------------|---------------------------------------|-------------------------------------|---------------------------------------|---------------------------------------|------------------------------|
| cg09488203   | 0.0090                              | 1.33E-05                              | 3.27E-02                              | 0.0099                              | 2.37E-06                              | 7.83E-03                              | 0.009                        |
| cg13928411   | 0.0090                              | 1.35E-05                              | 3.29E-02                              | 0.0098                              | 3.22E-06                              | 9.91E-03                              | 0.008                        |
| cg16231923   | 0.0200                              | 1.36E-05                              | 3.30E-02                              | 0.0200                              | 2.58E-05                              | 4.48E-02                              | 0.023                        |
| cg20274009   | 0.0070                              | 1.37E-05                              | 3.32E-02                              | 0.0073                              | 5.67E-06                              | 1.55E-02                              | 0.004                        |
| cg22877366   | -0.0200                             | 1.40E-05                              | 3.35E-02                              | -0.0175                             | 1.71E-04                              | 1.32E-01                              | -0.019                       |
| cg16449012   | 0.0110                              | 1.42E-05                              | 3.39E-02                              | 0.0133                              | 3.72E-07                              | 1.90E-03                              | 0.011                        |
| cg00433296   | 0.0100                              | 1.43E-05                              | 3.39E-02                              | 0.0117                              | 1.59E-06                              | 5.64E-03                              | 0.01                         |
| cg05656688   | -0.0140                             | 1.44E-05                              | 3.40E-02                              | -0.0134                             | 1.48E-05                              | 3.15E-02                              | -0.015                       |
| cg08142858   | 0.0080                              | 1.49E-05                              | 3.49E-02                              | 0.0092                              | 1.47E-06                              | 5.35E-03                              | 0.005                        |
| cg25415695   | 0.0120                              | 1.61E-05                              | 3.70E-02                              | 0.0148                              | 2.75E-07                              | 1.44E-03                              | 0.012                        |
| cg25122233   | 0.0200                              | 1.61E-05                              | 3.70E-02                              | 0.0225                              | 4.43E-06                              | 1.29E-02                              | 0.018                        |
| cg18828927   | 0.0080                              | 1.62E-05                              | 3.70E-02                              | 0.0072                              | 3.41E-04                              | 1.88E-01                              | 0.006                        |
| cg08698721   | 0.0130                              | 1.66E-05                              | 3.74E-02                              | 0.0130                              | 1.37E-05                              | 2.94E-02                              | 0.012                        |
| cg22879098   | -0.0300                             | 1.67E-05                              | 3.74E-02                              | -0.0290                             | 7.75E-05                              | 8.66E-02                              | -0.025                       |
| cg07448928   | 0.0070                              | 1.67E-05                              | 3.74E-02                              | 0.0081                              | 6.81E-06                              | 1.76E-02                              | 0.006                        |
| cg12443001   | 0.0100                              | 1.67E-05                              | 3.74E-02                              | 0.0115                              | 7.33E-07                              | 3.16E-03                              | 0.008                        |
| cg23458168   | 0.0290                              | 1.76E-05                              | 3.90E-02                              | 0.0319                              | 7.64E-07                              | 3.25E-03                              | 0.033                        |
| cg13547053   | 0.0100                              | 1.83E-05                              | 3.99E-02                              | 0.0082                              | 2.54E-04                              | 1.65E-01                              | 0.011                        |
| cg17345450   | -0.0110                             | 1.83E-05                              | 3.99E-02                              | -0.0098                             | 1.72E-04                              | 1.32E-01                              | -0.014                       |
| cg23928512   | -0.0110                             | 1.83E-05                              | 3.99E-02                              | -0.0076                             | 2.99E-03                              | 4.87E-01                              | -0.013                       |
| cg07553761   | 0.0040                              | 1.94E-05                              | 4.19E-02                              | 0.0043                              | 2.49E-05                              | 4.41E-02                              | 0.005                        |
| cg13459104   | 0.0030                              | 1.95E-05                              | 4.19E-02                              | 0.0030                              | 9.34E-05                              | 9.52E-02                              | 0.003                        |
| cg15893360   | -0.0130                             | 1.96E-05                              | 4.19E-02                              | -0.0139                             | 6.18E-06                              | 1.65E-02                              | -0.012                       |
| cg02404974   | 0.0150                              | 1.99E-05                              | 4.23E-02                              | 0.0159                              | 1.09E-05                              | 2.46E-02                              | 0.015                        |
| cg04807108   | 0.0220                              | 2.01E-05                              | 4.24E-02                              | 0.0228                              | 1.91E-05                              | 3.71E-02                              | 0.026                        |
| cg22171758   | 0.0120                              | 2.02E-05                              | 4.24E-02                              | 0.0131                              | 8.25E-06                              | 2.05E-02                              | 0.01                         |
| cg03486379   | 0.0090                              | 2.03E-05                              | 4.24E-02                              | 0.0088                              | 1.60E-04                              | 1.27E-01                              | 0.008                        |

| Probe      | Model1 <sup>b</sup><br>Coeff | Model1 <sup>b</sup><br>P-value | Model1 <sup>b</sup><br>q-value | Model2 <sup>c</sup><br>Coeff | Model2 <sup>c</sup><br>P-value | Model2 <sup>c</sup><br>q-value | Δ β-value <sup>d</sup> |
|------------|------------------------------|--------------------------------|--------------------------------|------------------------------|--------------------------------|--------------------------------|------------------------|
| cg07464358 | 0.0080                       | 2.08E-05                       | 4.30E-02                       | 0.0073                       | 5.79E-05                       | 7.34E-02                       | 0.011                  |
| cg19675142 | 0.0130                       | 2.08E-05                       | 4.30E-02                       | 0.0127                       | 8.15E-05                       | 8.80E-02                       | 0.013                  |
| cg08755703 | 0.0170                       | 2.12E-05                       | 4.36E-02                       | 0.0181                       | 9.89E-06                       | 2.28E-02                       | 0.022                  |
| cg20174893 | -0.0100                      | 2.16E-05                       | 4.41E-02                       | -0.0110                      | 2.05E-05                       | 3.88E-02                       | -0.009                 |
| cg10788371 | -0.0100                      | 2.20E-05                       | 4.47E-02                       | -0.0090                      | 9.55E-05                       | 9.64E-02                       | -0.009                 |
| cg06509837 | -0.0260                      | 2.22E-05                       | 4.47E-02                       | -0.0205                      | 1.06E-03                       | 3.27E-01                       | -0.025                 |
| cg18209323 | 0.0160                       | 2.23E-05                       | 4.47E-02                       | 0.0151                       | 6.37E-05                       | 7.66E-02                       | 0.016                  |
| cg11064524 | -0.0110                      | 2.33E-05                       | 4.65E-02                       | -0.0106                      | 1.04E-04                       | 1.03E-01                       | -0.013                 |
| cg03687532 | 0.0120                       | 2.41E-05                       | 4.77E-02                       | 0.0117                       | 4.94E-05                       | 6.59E-02                       | 0.015                  |
| cg26580869 | -0.0190                      | 2.41E-05                       | 4.77E-02                       | -0.0172                      | 4.57E-05                       | 6.38E-02                       | -0.02                  |
| cg13455434 | 0.0260                       | 2.44E-05                       | 4.77E-02                       | 0.0202                       | 1.34E-03                       | 3.59E-01                       | 0.027                  |
| cg16944958 | -0.0120                      | 2.44E-05                       | 4.77E-02                       | -0.0122                      | 3.85E-05                       | 5.76E-02                       | -0.01                  |
| cg26827653 | 0.0120                       | 2.50E-05                       | 4.85E-02                       | 0.0147                       | 1.42E-06                       | 5.27E-03                       | 0.012                  |
| cg19563365 | 0.0070                       | 2.56E-05                       | 4.94E-02                       | 0.0070                       | 2.89E-05                       | 4.78E-02                       | 0.007                  |

Abbreviations: Chr: chromosome, coeff: coefficient

<sup>a</sup>FDR  $q < 0.05$  (Model1). <sup>b</sup>Model1: Methylation  $\beta$ -value = maternal smoking + infant's sex + infant's cleft status + batch effect + bisulfite conversion efficiency. <sup>c</sup>Model2: Methylation  $\beta$ -value = maternal smoking + infant's sex + infant's cleft status + batch effect + bisulfite conversion efficiency + maternal alcohol use + maternal education + maternal age at delivery + maternal folic acid supplement use + infant's birth weight + adjustment for 5 different cell type proportions using GSE35069. <sup>d</sup> $\beta$ -value represents the ratio of methylated signal to total signal (methylated plus unmethylated). This shows the difference between the mean  $\beta$ -value of smokers and non-smokers.

\*Meets bonferroni correction ( $p < 1.4 \times 10^{-7}$ ).

**Table S3.** CpG probe annotation.

| Probe      | Nearest gene        | Location <sup>a</sup> | Left gene <sup>b</sup> | Right gene <sup>b</sup> | Left gene: Direction <sup>c</sup> | Right gene: Direction <sup>c</sup> | Gene: Direction <sup>c</sup> | (Left) gene: Distance <sup>d</sup> | (Right) gene: Distance <sup>d</sup> |
|------------|---------------------|-----------------------|------------------------|-------------------------|-----------------------------------|------------------------------------|------------------------------|------------------------------------|-------------------------------------|
| cg06415891 | <i>HES5</i>         | Intergenic            | <i>HES5</i>            | <i>LOC115110</i>        | -                                 | -                                  | NA                           | 5412                               | 14263                               |
| cg20816361 | <i>HES5</i>         | Intergenic            | <i>HES5</i>            | <i>LOC115110</i>        | -                                 | -                                  | NA                           | 5416                               | 14259                               |
| cg12443001 | <i>HES5</i>         | Intergenic            | <i>HES5</i>            | <i>LOC115110</i>        | -                                 | -                                  | NA                           | 5597                               | 14078                               |
| cg08142858 | <i>TTC34</i>        | Intergenic            | <i>TTC34</i>           | <i>ACTRT2</i>           | -                                 | +                                  | NA                           | 12512                              | 219304                              |
| cg15836046 | <i>TTC34</i>        | Intergenic            | <i>TTC34</i>           | <i>ACTRT2</i>           | -                                 | +                                  | NA                           | 61012                              | 170804                              |
| cg15522425 | <i>TTC34</i>        | Intergenic            | <i>TTC34</i>           | <i>ACTRT2</i>           | -                                 | +                                  | NA                           | 86407                              | 145409                              |
| cg15325070 | <i>TTC34</i>        | Intergenic            | <i>TTC34</i>           | <i>ACTRT2</i>           | -                                 | +                                  | NA                           | 86474                              | 145342                              |
| cg22877366 | <i>MIIP</i>         | Intergenic            | <i>MIIP</i>            | <i>TNFRSF8</i>          | +                                 | +                                  | NA                           | 15562                              | 15766                               |
| cg15963463 | <i>RUNX3</i>        | Intron                | NA                     | NA                      | NA                                | NA                                 | -                            | 27235                              | 38264                               |
| cg05656688 | <i>RUNX3</i>        | CDS                   | NA                     | NA                      | NA                                | NA                                 | -                            | 28086                              | 37413                               |
| cg25189904 | <i>GNG12</i>        | Intergenic            | <i>GNG12</i>           | <i>LOC100133029</i>     | -                                 | +                                  | NA                           | 338                                | 209519                              |
| cg26764244 | <i>GNG12</i>        | Intergenic            | <i>GNG12</i>           | <i>LOC100133029</i>     | -                                 | +                                  | NA                           | 356                                | 209501                              |
| cg10399789 | <i>GFI1</i>         | Intron                | NA                     | NA                      | NA                                | NA                                 | -                            | 5350                               | 6765                                |
| cg09662411 | <i>GFI1</i>         | Intron                | NA                     | NA                      | NA                                | NA                                 | -                            | 5814                               | 6301                                |
| cg06338710 | <i>GFI1</i>         | CDS                   | NA                     | NA                      | NA                                | NA                                 | -                            | 5869                               | 6246                                |
| cg18146737 | <i>GFI1</i>         | Intron                | NA                     | NA                      | NA                                | NA                                 | -                            | 6382                               | 5733                                |
| cg12876356 | <i>GFI1</i>         | Intron                | NA                     | NA                      | NA                                | NA                                 | -                            | 6507                               | 5608                                |
| cg18316974 | <i>GFI1</i>         | Intron                | NA                     | NA                      | NA                                | NA                                 | -                            | 6717                               | 5398                                |
| cg09935388 | <i>GFI1</i>         | Intron                | NA                     | NA                      | NA                                | NA                                 | -                            | 7270                               | 4845                                |
| cg14179389 | <i>GFI1</i>         | Intron                | NA                     | NA                      | NA                                | NA                                 | -                            | 7643                               | 4472                                |
| cg19675142 | <i>LOC100132332</i> | Intron                | NA                     | NA                      | NA                                | NA                                 | +                            | 12                                 | 1038                                |
| cg17442776 | <i>TRNAQ8</i>       | Intergenic            | <i>LOC100505824</i>    | <i>TRNAQ8</i>           | +                                 | -                                  | NA                           | 82852                              | 18842                               |
| cg16517298 | <i>GALNT2</i>       | Intron                | NA                     | NA                      | NA                                | NA                                 | +                            | 210218                             | 4701                                |
| cg19727396 | <i>GALNT2</i>       | CDS                   | NA                     | NA                      | NA                                | NA                                 | +                            | 212229                             | 2690                                |

| Probe      | Nearest gene     | Location <sup>a</sup> | Left gene <sup>b</sup> | Right gene <sup>b</sup> | Left gene: Direction <sup>c</sup> | Right gene: Direction <sup>c</sup> | Gene: Direction <sup>c</sup> | (Left) gene: Distance <sup>d</sup> | (Right) gene: Distance <sup>d</sup> |
|------------|------------------|-----------------------|------------------------|-------------------------|-----------------------------------|------------------------------------|------------------------------|------------------------------------|-------------------------------------|
| cg24591105 | <i>GALNT2</i>    | UTR                   | NA                     | NA                      | NA                                | NA                                 | +                            | 212269                             | 2650                                |
| cg00589617 | <i>GALNT2</i>    | UTR                   | NA                     | NA                      | NA                                | NA                                 | +                            | 212387                             | 2532                                |
| cg05697274 | <i>GALNT2</i>    | UTR                   | NA                     | NA                      | NA                                | NA                                 | +                            | 212421                             | 2498                                |
| cg24250902 | <i>GALNT2</i>    | UTR                   | NA                     | NA                      | NA                                | NA                                 | +                            | 212591                             | 2328                                |
| cg03144619 | <i>GALNT2</i>    | UTR                   | NA                     | NA                      | NA                                | NA                                 | +                            | 212712                             | 2207                                |
| cg09368188 | <i>KIF26B</i>    | Intron                | NA                     | NA                      | NA                                | NA                                 | +                            | 11731                              | 536410                              |
| cg26119806 | <i>KCNS3</i>     | Intron                | NA                     | NA                      | NA                                | NA                                 | +                            | 1627                               | 52653                               |
| cg08026735 | <i>VWA3B</i>     | Intron                | NA                     | NA                      | NA                                | NA                                 | +                            | 293                                | 225522                              |
| cg18703066 | <i>LOC284998</i> | UTR                   | NA                     | NA                      | NA                                | NA                                 | -                            | 441                                | 10641                               |
| cg13547053 | <i>OSBPL6</i>    | Intron                | NA                     | NA                      | NA                                | NA                                 | +                            | 125656                             | 79296                               |
| cg22057874 | <i>OSBPL6</i>    | Intron                | NA                     | NA                      | NA                                | NA                                 | +                            | 125658                             | 79294                               |
| cg11641006 | <i>RPS20P12</i>  | Intergenic            | <i>SPP2</i>            | <i>RPS20P12</i>         | +                                 | +                                  | NA                           | 228098                             | 24172                               |
| cg18096987 | <i>VGLL4</i>     | Intron                | NA                     | NA                      | NA                                | NA                                 | -                            | 26329                              | 138347                              |
| cg18722086 | <i>KIAA2018</i>  | CDS                   | NA                     | NA                      | NA                                | NA                                 | -                            | 12840                              | 35421                               |
| cg07553761 | <i>TRIM59</i>    | Intergenic            | <i>TRIM59</i>          | <i>B3GAT3P1</i>         | -                                 | +                                  | NA                           | 351                                | 2179                                |
| cg04098479 | <i>WHSC2</i>     | Intron                | NA                     | NA                      | NA                                | NA                                 | -                            | 10406                              | 16110                               |
| cg16449012 | <i>FAM184B</i>   | Intron                | NA                     | NA                      | NA                                | NA                                 | -                            | 148184                             | 1255                                |
| cg14349977 | <i>LOC285441</i> | Intron                | NA                     | NA                      | NA                                | NA                                 | -                            | 12178                              | 202782                              |
| cg18753646 | <i>LOC285441</i> | Intron                | NA                     | NA                      | NA                                | NA                                 | -                            | 12286                              | 202674                              |
| cg17924476 | <i>AHRR</i>      | Intron                | NA                     | NA                      | NA                                | NA                                 | +                            | 19503                              | 114612                              |
| cg23067299 | <i>AHRR</i>      | Intron                | NA                     | NA                      | NA                                | NA                                 | +                            | 19616                              | 114499                              |
| cg08606254 | <i>AHRR</i>      | Intron                | NA                     | NA                      | NA                                | NA                                 | +                            | 19678                              | 114437                              |
| cg12806681 | <i>AHRR</i>      | Intron                | NA                     | NA                      | NA                                | NA                                 | +                            | 64103                              | 70012                               |
| cg03991871 | <i>AHRR</i>      | Intron                | NA                     | NA                      | NA                                | NA                                 | +                            | 64156                              | 69959                               |
| cg23916896 | <i>AHRR</i>      | Intron                | NA                     | NA                      | NA                                | NA                                 | +                            | 64513                              | 69602                               |
| cg11902777 | <i>AHRR</i>      | Intron                | NA                     | NA                      | NA                                | NA                                 | +                            | 64552                              | 69563                               |



| Probe      | Nearest gene        | Location <sup>a</sup> | Left gene <sup>b</sup> | Right gene <sup>b</sup> | Left gene: Direction <sup>c</sup> | Right gene: Direction <sup>c</sup> | Gene: Direction <sup>c</sup> | (Left) gene: Distance <sup>d</sup> | (Right) gene: Distance <sup>d</sup> |
|------------|---------------------|-----------------------|------------------------|-------------------------|-----------------------------------|------------------------------------|------------------------------|------------------------------------|-------------------------------------|
| cg05575921 | <i>AHRR</i>         | Intron                | NA                     | NA                      | NA                                | NA                                 | +                            | 69087                              | 65028                               |
| cg14817490 | <i>AHRR</i>         | Intron                | NA                     | NA                      | NA                                | NA                                 | +                            | 88629                              | 45486                               |
| cg21161138 | <i>AHRR</i>         | Intron                | NA                     | NA                      | NA                                | NA                                 | +                            | 95069                              | 39046                               |
| cg22937882 | <i>AHRR</i>         | Intron                | NA                     | NA                      | NA                                | NA                                 | +                            | 101483                             | 32632                               |
| cg07448928 | <i>AHRR</i>         | CDS                   | NA                     | NA                      | NA                                | NA                                 | +                            | 123464                             | 10651                               |
| cg10841124 | <i>AHRR</i>         | Intron                | NA                     | NA                      | NA                                | NA                                 | +                            | 128983                             | 5132                                |
| cg26954197 | <i>AHRR</i>         | UTR                   | NA                     | NA                      | NA                                | NA                                 | +                            | 132525                             | 1590                                |
| cg22879098 | <i>TPPP</i>         | Intron                | NA                     | NA                      | NA                                | NA                                 | -                            | 12868                              | 20665                               |
| cg01952185 | <i>TIFAB</i>        | Intergenic            | <i>TIFAB</i>           | <i>NEUROG1</i>          | -                                 | -                                  | NA                           | 25124                              | 56759                               |
| cg11429111 | <i>TIFAB</i>        | Intergenic            | <i>TIFAB</i>           | <i>NEUROG1</i>          | -                                 | -                                  | NA                           | 25240                              | 56643                               |
| cg25383593 | <i>TIFAB</i>        | Intergenic            | <i>TIFAB</i>           | <i>NEUROG1</i>          | -                                 | -                                  | NA                           | 39731                              | 42152                               |
| cg25415695 | <i>TIFAB</i>        | Intergenic            | <i>TIFAB</i>           | <i>NEUROG1</i>          | -                                 | -                                  | NA                           | 39947                              | 41936                               |
| cg04800195 | <i>ZFP62</i>        | Intron                | NA                     | NA                      | NA                                | NA                                 | -                            | 13293                              | 382                                 |
| cg26889659 | <i>EXOC2</i>        | Intron                | NA                     | NA                      | NA                                | NA                                 | -                            | 198952                             | 9019                                |
| cg18694169 | <i>NKAPL</i>        | Intergenic            | <i>ZKSCAN4</i>         | <i>NKAPL</i>            | -                                 | +                                  | NA                           | 7077                               | 19                                  |
| cg10253847 | <i>NKAPL</i>        | Intergenic            | <i>ZKSCAN4</i>         | <i>NKAPL</i>            | -                                 | +                                  | NA                           | 7083                               | 13                                  |
| cg01031101 | <i>NKAPL</i>        | Intergenic            | <i>ZKSCAN4</i>         | <i>NKAPL</i>            | -                                 | +                                  | NA                           | 7089                               | 7                                   |
| cg09523275 | <i>NKAPL</i>        | Intergenic            | <i>ZKSCAN4</i>         | <i>NKAPL</i>            | -                                 | +                                  | NA                           | 7091                               | 5                                   |
| cg18675097 | <i>NKAPL</i>        | UTR                   | NA                     | NA                      | NA                                | NA                                 | +                            | 29                                 | 1609                                |
| cg18828927 | <i>OR14J1</i>       | CDS                   | NA                     | NA                      | NA                                | NA                                 | +                            | 796                                | 169                                 |
| cg14027333 | <i>PRRT1</i>        | UTR                   | NA                     | NA                      | NA                                | NA                                 | -                            | 177                                | 3403                                |
| cg02404974 | <i>LOC100505711</i> | Intergenic            | <i>LOC100505711</i>    | <i>LOC100505730</i>     | -                                 | -                                  | NA                           | 25472                              | 115338                              |
| cg14086013 | <i>MDFI</i>         | Intergenic            | <i>FOXP4</i>           | <i>MDFI</i>             | +                                 | +                                  | NA                           | 34618                              | 1455                                |
| cg03354508 | <i>YAP1P1</i>       | Intergenic            | <i>YAP1P1</i>          | <i>SAMD5</i>            | +                                 | +                                  | NA                           | 40081                              | 60330                               |
| cg17345450 | <i>SDIM1</i>        | Intergenic            | <i>PDE10A</i>          | <i>SDIM1</i>            | -                                 | -                                  | NA                           | 184354                             | 47392                               |
| cg00794911 | <i>SDIM1</i>        | Intergenic            | <i>PDE10A</i>          | <i>SDIM1</i>            | -                                 | -                                  | NA                           | 184948                             | 46798                               |

| Probe      | Nearest gene        | Location <sup>a</sup> | Left gene <sup>b</sup> | Right gene <sup>b</sup> | Left gene: Direction <sup>c</sup> | Right gene: Direction <sup>c</sup> | Gene: Direction <sup>c</sup> | (Left) gene: Distance <sup>d</sup> | (Right) gene: Distance <sup>d</sup> |
|------------|---------------------|-----------------------|------------------------|-------------------------|-----------------------------------|------------------------------------|------------------------------|------------------------------------|-------------------------------------|
| cg18132363 | <i>SDIM1</i>        | Intergenic            | <i>PDE10A</i>          | <i>SDIM1</i>            | -                                 | -                                  | NA                           | 184988                             | 46758                               |
| cg11625488 | <i>LOC100505903</i> | Intergenic            | <i>C6orf208</i>        | <i>LOC100505903</i>     | +                                 | +                                  | NA                           | 200588                             | 72339                               |
| cg10312186 | <i>LOC100505903</i> | Intergenic            | <i>C6orf208</i>        | <i>LOC100505903</i>     | +                                 | +                                  | NA                           | 200614                             | 72313                               |
| cg16944958 | <i>LOC100505903</i> | Intergenic            | <i>C6orf208</i>        | <i>LOC100505903</i>     | +                                 | +                                  | NA                           | 200993                             | 71934                               |
| cg07249149 | <i>C7orf50</i>      | Intergenic            | <i>CYP2W1</i>          | <i>C7orf50</i>          | +                                 | -                                  | NA                           | 6087                               | 1260                                |
| cg07104557 | <i>C7orf50</i>      | UTR                   | NA                     | NA                      | NA                                | NA                                 | -                            | 30                                 | 141240                              |
| cg19089201 | <i>MYO1G</i>        | UTR                   | NA                     | NA                      | NA                                | NA                                 | -                            | 27                                 | 16417                               |
| cg22132788 | <i>MYO1G</i>        | CDS                   | NA                     | NA                      | NA                                | NA                                 | -                            | 226                                | 16218                               |
| cg04180046 | <i>MYO1G</i>        | Intron                | NA                     | NA                      | NA                                | NA                                 | -                            | 476                                | 15968                               |
| cg12803068 | <i>MYO1G</i>        | Intron                | NA                     | NA                      | NA                                | NA                                 | -                            | 659                                | 15785                               |
| cg16459265 | <i>C7orf40</i>      | Intron                | NA                     | NA                      | NA                                | NA                                 | -                            | 2453                               | 1179                                |
| cg04598670 | <i>LOC100507468</i> | Intergenic            | <i>LOC100419458</i>    | <i>LOC100507468</i>     | +                                 | -                                  | NA                           | 591057                             | 363472                              |
| cg18209323 | <i>SAMD9</i>        | Intergenic            | <i>RN7SL7P</i>         | <i>SAMD9</i>            | -                                 | -                                  | NA                           | 72238                              | 55948                               |
| cg20174893 | <i>MGC72080</i>     | Intron                | NA                     | NA                      | NA                                | NA                                 | -                            | 5018                               | 712                                 |
| cg07464358 | <i>RABL5</i>        | Intergenic            | <i>LOC100506507</i>    | <i>RABL5</i>            | +                                 | -                                  | NA                           | 7739                               | 4284                                |
| cg25949550 | <i>CNTNAP2</i>      | Intron                | NA                     | NA                      | NA                                | NA                                 | +                            | 853                                | 2303784                             |
| cg15578140 | <i>CNTNAP2</i>      | Intron                | NA                     | NA                      | NA                                | NA                                 | +                            | 1904656                            | 399981                              |
| cg00433296 | <i>SLC39A14</i>     | Intergenic            | <i>PIWIL2</i>          | <i>SLC39A14</i>         | +                                 | +                                  | NA                           | 10268                              | 910                                 |
| cg13455434 | <i>RBPMS</i>        | Intron                | NA                     | NA                      | NA                                | NA                                 | +                            | 1986                               | 185804                              |
| cg02892925 | <i>LOC100505501</i> | UTR                   | NA                     | NA                      | NA                                | NA                                 | +                            | 1149                               | 1471                                |
| cg07211044 | <i>LOC100505501</i> | UTR                   | NA                     | NA                      | NA                                | NA                                 | +                            | 1206                               | 1414                                |
| cg18794473 | <i>ZFHX4</i>        | CDS                   | NA                     | NA                      | NA                                | NA                                 | +                            | 24179                              | 161827                              |
| cg04640109 | <i>ZFPM2</i>        | Intergenic            | <i>RPL17P32</i>        | <i>ZFPM2</i>            | -                                 | +                                  | NA                           | 29580                              | 974                                 |
| cg11064524 | <i>EXT1</i>         | Intron                | NA                     | NA                      | NA                                | NA                                 | -                            | 63527                              | 248929                              |
| cg13459104 | <i>LOC158435</i>    | Intron                | NA                     | NA                      | NA                                | NA                                 | +                            | 21600                              | 14473                               |
| cg01825213 | <i>HSD17B3</i>      | Intergenic            | <i>EIF4BP3</i>         | <i>HSD17B3</i>          | +                                 | -                                  | NA                           | 69830                              | 17624                               |

| Probe      | Nearest gene     | Location <sup>a</sup> | Left gene <sup>b</sup> | Right gene <sup>b</sup> | Left gene: Direction <sup>c</sup> | Right gene: Direction <sup>c</sup> | Gene: Direction <sup>c</sup> | (Left) gene: Distance <sup>d</sup> | (Right) gene: Distance <sup>d</sup> |
|------------|------------------|-----------------------|------------------------|-------------------------|-----------------------------------|------------------------------------|------------------------------|------------------------------------|-------------------------------------|
| cg13784312 | <i>RAPGEF1</i>   | Intron                | NA                     | NA                      | NA                                | NA                                 | -                            | 156908                             | 3860                                |
| cg13822849 | <i>OLFM1</i>     | Intron                | NA                     | NA                      | NA                                | NA                                 | +                            | 32668                              | 13273                               |
| cg20344448 | <i>FRMD4A</i>    | Intron                | NA                     | NA                      | NA                                | NA                                 | -                            | 686725                             | 435                                 |
| cg11813497 | <i>FRMD4A</i>    | Intergenic            | <i>FRMD4A</i>          | <i>MIR4293</i>          | -                                 | -                                  | NA                           | 13                                 | 52320                               |
| cg25464840 | <i>FRMD4A</i>    | Intergenic            | <i>FRMD4A</i>          | <i>MIR4293</i>          | -                                 | -                                  | NA                           | 44                                 | 52289                               |
| cg15507334 | <i>FRMD4A</i>    | Intergenic            | <i>FRMD4A</i>          | <i>MIR4293</i>          | -                                 | -                                  | NA                           | 47                                 | 52286                               |
| cg03486379 | <i>PARD3</i>     | Intergenic            | <i>RPL23P11</i>        | <i>PARD3</i>            | +                                 | -                                  | NA                           | 237605                             | 7232                                |
| cg24239148 | <i>C10orf107</i> | UTR                   | NA                     | NA                      | NA                                | NA                                 | +                            | 122                                | 103250                              |
| cg06813382 | <i>LOC439990</i> | Intergenic            | <i>ANXA11</i>          | <i>LOC439990</i>        | -                                 | +                                  | NA                           | 1867                               | 271                                 |
| cg08626436 | <i>BMPR1A</i>    | Intron                | NA                     | NA                      | NA                                | NA                                 | +                            | 38943                              | 129606                              |
| cg09488203 | <i>O3FAR1</i>    | Intron                | NA                     | NA                      | NA                                | NA                                 | +                            | 1462                               | 21945                               |
| cg05593775 | <i>PDZD7</i>     | CDS                   | NA                     | NA                      | NA                                | NA                                 | -                            | 11303                              | 12171                               |
| cg18621256 | <i>EMX2OS</i>    | Intergenic            | <i>PDZD8</i>           | <i>EMX2OS</i>           | -                                 | -                                  | NA                           | 86507                              | 22360                               |
| cg10673740 | <i>BAG3</i>      | Intron                | NA                     | NA                      | NA                                | NA                                 | +                            | 944                                | 25505                               |
| cg22043296 | <i>LSP1</i>      | UTR                   | NA                     | NA                      | NA                                | NA                                 | +                            | 17939                              | 21354                               |
| cg19631472 | <i>LDHA</i>      | Intergenic            | <i>MIR3159</i>         | <i>LDHA</i>             | +                                 | +                                  | NA                           | 6234                               | 295                                 |
| cg10788371 | <i>LRRC32</i>    | UTR                   | NA                     | NA                      | NA                                | NA                                 | -                            | 12472                              | 751                                 |
| cg09063262 | <i>TMEM126A</i>  | Intergenic            | <i>TMEM126B</i>        | <i>TMEM126A</i>         | +                                 | +                                  | NA                           | 10923                              | 457                                 |
| cg19563365 | <i>PRSS23</i>    | Intergenic            | <i>ME3</i>             | <i>PRSS23</i>           | -                                 | +                                  | NA                           | 124721                             | 3092                                |
| cg02356218 | <i>OR8B9P</i>    | Intergenic            | <i>OR8B9P</i>          | <i>OR8B10P</i>          | -                                 | -                                  | NA                           | 589                                | 34158                               |
| cg26827653 | <i>MGC39545</i>  | UTR                   | NA                     | NA                      | NA                                | NA                                 | +                            | 1315                               | 167                                 |
| cg10520740 | <i>CACNA2D4</i>  | Intron                | NA                     | NA                      | NA                                | NA                                 | -                            | 51675                              | 75072                               |
| cg22171758 | <i>CALCOCO1</i>  | Intergenic            | <i>CALCOCO1</i>        | <i>HOXC13</i>           | -                                 | +                                  | NA                           | 24826                              | 186443                              |
| cg25122233 | <i>HOXC4</i>     | Intron                | NA                     | NA                      | NA                                | NA                                 | +                            | 1864                               | 37308                               |
| cg03453449 | <i>USP44</i>     | UTR                   | NA                     | NA                      | NA                                | NA                                 | -                            | 34241                              | 143                                 |
| cg25632883 | <i>SSH1</i>      | Intron                | NA                     | NA                      | NA                                | NA                                 | -                            | 73972                              | 921                                 |

| Probe      | Nearest gene       | Location <sup>a</sup> | Left gene <sup>b</sup> | Right gene <sup>b</sup> | Left gene: Direction <sup>c</sup> | Right gene: Direction <sup>c</sup> | Gene: Direction <sup>c</sup> | (Left) gene: Distance <sup>d</sup> | (Right) gene: Distance <sup>d</sup> |
|------------|--------------------|-----------------------|------------------------|-------------------------|-----------------------------------|------------------------------------|------------------------------|------------------------------------|-------------------------------------|
| cg24698536 | <i>SSH1</i>        | Intron                | NA                     | NA                      | NA                                | NA                                 | -                            | 74049                              | 844                                 |
| cg12492906 | <i>SSH1</i>        | Intron                | NA                     | NA                      | NA                                | NA                                 | -                            | 74079                              | 814                                 |
| cg00029284 | <i>CUX2</i>        | Intron                | NA                     | NA                      | NA                                | NA                                 | +                            | 259375                             | 57155                               |
| cg26103179 | <i>SRRM4</i>       | Intron                | NA                     | NA                      | NA                                | NA                                 | +                            | 172364                             | 9192                                |
| cg12160087 | <i>CCDC64</i>      | UTR                   | NA                     | NA                      | NA                                | NA                                 | +                            | 104338                             | 313                                 |
| cg15893360 | <i>PXN</i>         | Intron                | NA                     | NA                      | NA                                | NA                                 | -                            | 52111                              | 3202                                |
| cg08698721 | <i>MEG3</i>        | Intron                | NA                     | NA                      | NA                                | NA                                 | +                            | 1702                               | 33216                               |
| cg04291079 | <i>MEG3</i>        | Intron                | NA                     | NA                      | NA                                | NA                                 | +                            | 1985                               | 32933                               |
| cg26554302 | <i>IGHV1OR15-3</i> | Intergenic            | <i>IGHV1OR15-3</i>     | <i>LOC642131</i>        | -                                 | -                                  | NA                           | 833                                | 4128                                |
| cg03796381 | <i>COX6CP4</i>     | Intergenic            | <i>LOC100507480</i>    | <i>COX6CP4</i>          | +                                 | +                                  | NA                           | 308303                             | 214098                              |
| cg10078511 | <i>THBS1</i>       | Intergenic            | <i>C15orf54</i>        | <i>THBS1</i>            | +                                 | +                                  | NA                           | 324984                             | 1248                                |
| cg23849826 | <i>THBS1</i>       | Intergenic            | <i>C15orf54</i>        | <i>THBS1</i>            | +                                 | +                                  | NA                           | 325138                             | 1094                                |
| cg16231923 | <i>NPTN</i>        | Intron                | NA                     | NA                      | NA                                | NA                                 | -                            | 71290                              | 2119                                |
| cg00213123 | <i>CYP1A1</i>      | Intergenic            | <i>CYP1A1</i>          | <i>CYP1A2</i>           | -                                 | +                                  | NA                           | 1193                               | 22114                               |
| cg05549655 | <i>CYP1A1</i>      | Intergenic            | <i>CYP1A1</i>          | <i>CYP1A2</i>           | -                                 | +                                  | NA                           | 1266                               | 22041                               |
| cg17852385 | <i>CYP1A1</i>      | Intergenic            | <i>CYP1A1</i>          | <i>CYP1A2</i>           | -                                 | +                                  | NA                           | 1311                               | 21996                               |
| cg13570656 | <i>CYP1A1</i>      | Intergenic            | <i>CYP1A1</i>          | <i>CYP1A2</i>           | -                                 | +                                  | NA                           | 1319                               | 21988                               |
| cg12101586 | <i>CYP1A1</i>      | Intergenic            | <i>CYP1A1</i>          | <i>CYP1A2</i>           | -                                 | +                                  | NA                           | 1326                               | 21981                               |
| cg22549041 | <i>CYP1A1</i>      | Intergenic            | <i>CYP1A1</i>          | <i>CYP1A2</i>           | -                                 | +                                  | NA                           | 1374                               | 21933                               |
| cg11924019 | <i>CYP1A1</i>      | Intergenic            | <i>CYP1A1</i>          | <i>CYP1A2</i>           | -                                 | +                                  | NA                           | 1406                               | 21901                               |
| cg18092474 | <i>CYP1A1</i>      | Intergenic            | <i>CYP1A1</i>          | <i>CYP1A2</i>           | -                                 | +                                  | NA                           | 1425                               | 21882                               |
| cg26516004 | <i>CYP1A1</i>      | Intergenic            | <i>CYP1A1</i>          | <i>CYP1A2</i>           | -                                 | +                                  | NA                           | 1499                               | 21808                               |
| cg01359532 | <i>CYP1A2</i>      | Intron                | NA                     | NA                      | NA                                | NA                                 | +                            | 3942                               | 3815                                |
| cg04807108 | <i>RWDD1P1</i>     | Intergenic            | <i>RWDD1P1</i>         | <i>IREB2</i>            | +                                 | +                                  | NA                           | 22391                              | 32585                               |
| cg12937151 | <i>AGBL1</i>       | Intergenic            | <i>AGBL1</i>           | <i>LINC00052</i>        | +                                 | +                                  | NA                           | 185943                             | 361934                              |
| cg04459939 | <i>MESP1</i>       | Intergenic            | <i>WDR93</i>           | <i>MESP1</i>            | +                                 | -                                  | NA                           | 4272                               | 1957                                |

| Probe      | Nearest gene   | Location <sup>a</sup> | Left gene <sup>b</sup> | Right gene <sup>b</sup> | Left gene: Direction <sup>c</sup> | Right gene: Direction <sup>c</sup> | Gene: Direction <sup>c</sup> | (Left) gene: Distance <sup>d</sup> | (Right) gene: Distance <sup>d</sup> |
|------------|----------------|-----------------------|------------------------|-------------------------|-----------------------------------|------------------------------------|------------------------------|------------------------------------|-------------------------------------|
| cg23335299 | <i>MESP1</i>   | Intergenic            | <i>WDR93</i>           | <i>MESP1</i>            | +                                 | -                                  | NA                           | 4887                               | 1342                                |
| cg13834112 | <i>ANPEP</i>   | Intergenic            | <i>ANPEP</i>           | <i>C15orf38-AP3S2</i>   | -                                 | -                                  | NA                           | 3567                               | 12192                               |
| cg26804595 | <i>FBXL16</i>  | Intron                | NA                     | NA                      | NA                                | NA                                 | -                            | 7081                               | 6244                                |
| cg13928411 | <i>VWA3A</i>   | Intergenic            | <i>C16orf52</i>        | <i>VWA3A</i>            | +                                 | +                                  | NA                           | 7816                               | 72                                  |
| cg09743950 | <i>ITGAM</i>   | CDS                   | NA                     | NA                      | NA                                | NA                                 | +                            | 70587                              | 2338                                |
| cg00253658 | <i>FTO</i>     | Intergenic            | <i>FTO</i>             | <i>IRX3</i>             | +                                 | -                                  | NA                           | 62117                              | 106716                              |
| cg26681628 | <i>FTO</i>     | Intergenic            | <i>FTO</i>             | <i>IRX3</i>             | +                                 | -                                  | NA                           | 62171                              | 106662                              |
| cg03687532 | <i>FTO</i>     | Intergenic            | <i>FTO</i>             | <i>IRX3</i>             | +                                 | -                                  | NA                           | 79979                              | 88854                               |
| cg03177666 | <i>IRX3</i>    | Intergenic            | <i>IRX3</i>            | <i>CRNDE</i>            | -                                 | -                                  | NA                           | 44725                              | 587672                              |
| cg08755703 | <i>IRX3</i>    | Intergenic            | <i>IRX3</i>            | <i>CRNDE</i>            | -                                 | -                                  | NA                           | 74611                              | 557786                              |
| cg24173182 | <i>HIC1</i>    | CDS                   | NA                     | NA                      | NA                                | NA                                 | +                            | 2893                               | 1695                                |
| cg05568941 | <i>GJD3</i>    | UTR                   | NA                     | NA                      | NA                                | NA                                 | -                            | 1009                               | 3032                                |
| cg06949812 | <i>GJD3</i>    | UTR                   | NA                     | NA                      | NA                                | NA                                 | -                            | 1089                               | 2952                                |
| cg11096905 | <i>AXIN2</i>   | Intron                | NA                     | NA                      | NA                                | NA                                 | -                            | 10886                              | 22173                               |
| cg23928512 | <i>ASPSR1</i>  | Intron                | NA                     | NA                      | NA                                | NA                                 | +                            | 34766                              | 5090                                |
| cg23664708 | <i>SLC16A3</i> | UTR                   | NA                     | NA                      | NA                                | NA                                 | +                            | 10621                              | 472                                 |
| cg06509837 | <i>HCN2</i>    | Intron                | NA                     | NA                      | NA                                | NA                                 | +                            | 21062                              | 6204                                |
| cg26580869 | <i>HCN2</i>    | Intron                | NA                     | NA                      | NA                                | NA                                 | +                            | 21613                              | 5653                                |
| cg02010738 | <i>MOB3A</i>   | Intron                | NA                     | NA                      | NA                                | NA                                 | -                            | 24431                              | 803                                 |
| cg08097581 | <i>AKAP8L</i>  | Intron                | NA                     | NA                      | NA                                | NA                                 | -                            | 37730                              | 1244                                |
| cg26652413 | <i>CPAMD8</i>  | CDS                   | NA                     | NA                      | NA                                | NA                                 | -                            | 3295                               | 130568                              |
| cg23458168 | <i>ZNF536</i>  | Intron                | NA                     | NA                      | NA                                | NA                                 | +                            | 1539                               | 184098                              |
| cg16547579 | <i>SLC23A2</i> | Intron                | NA                     | NA                      | NA                                | NA                                 | -                            | 121331                             | 27812                               |
| cg20244340 | <i>SLC24A3</i> | Intron                | NA                     | NA                      | NA                                | NA                                 | +                            | 699                                | 509552                              |
| cg11868728 | <i>FOXA2</i>   | Intergenic            | <i>FOXA2</i>           | <i>KRT18P3</i>          | -                                 | -                                  | NA                           | 2015                               | 145255                              |
| cg20274009 | <i>TPM3P2</i>  | Intergenic            | <i>CHMP4B</i>          | <i>TPM3P2</i>           | +                                 | -                                  | NA                           | 8673                               | 7535                                |

| Probe      | Nearest gene  | Location <sup>a</sup> | Left gene <sup>b</sup> | Right gene <sup>b</sup> | Left gene: Direction <sup>c</sup> | Right gene: Direction <sup>c</sup> | Gene: Direction <sup>c</sup> | (Left) gene: Distance <sup>d</sup> | (Right) gene: Distance <sup>d</sup> |
|------------|---------------|-----------------------|------------------------|-------------------------|-----------------------------------|------------------------------------|------------------------------|------------------------------------|-------------------------------------|
| cg07339236 | <i>ATP9A</i>  | Intron                | NA                     | NA                      | NA                                | NA                                 | -                            | 99176                              | 72418                               |
| cg20643029 | <i>CLDN14</i> | Intron                | NA                     | NA                      | NA                                | NA                                 | -                            | 82125                              | 33823                               |
| cg12426652 | <i>CLDN14</i> | Intron                | NA                     | NA                      | NA                                | NA                                 | -                            | 82137                              | 33811                               |
| cg04478905 | <i>CLDN14</i> | Intron                | NA                     | NA                      | NA                                | NA                                 | -                            | 82172                              | 33776                               |
| cg26441486 | <i>CRELD2</i> | Intron                | NA                     | NA                      | NA                                | NA                                 | +                            | 5017                               | 3886                                |

Abbreviations: CDS: coding DNA sequence, NA: not applicable, UTR: untranslated region

<sup>a</sup>If the CpG is listed as being part of the CDS or UTR, this annotation could change depending on the transcript used as the reference. <sup>b</sup>For only intergenic CpGs, the neighboring gene to the left or right is listed. <sup>c</sup>The '+' and '-' indicate if the gene is transcribed on the forward or reverse strand, respectively. <sup>d</sup>Distance (basepairs) to the UTR. If intergenic, the minimum distance to the left or right neighboring gene is listed. If within the gene body, distance to the start of the 5'UTR and end of 3'UTR is listed.

**Table S4.** CpG probe annotation.

| <b>Probe</b> | <b>Chr</b> | <b>Basepair<sup>a</sup></b> | <b>Distance to TSS<sup>b</sup></b> | <b>Closest TSS Gene<sup>c</sup></b> | <b>CpG Island<sup>d</sup></b> |
|--------------|------------|-----------------------------|------------------------------------|-------------------------------------|-------------------------------|
| cg06415891   | 1          | 2467096                     | -5412                              | <i>HES5</i>                         | Island                        |
| cg20816361   | 1          | 2467100                     | -5416                              | <i>HES5</i>                         | Island                        |
| cg12443001   | 1          | 2467281                     | -5597                              | <i>HES5</i>                         | Shore                         |
| cg08142858   | 1          | 2718742                     | -12512                             | <i>TTC34</i>                        | Shore                         |
| cg15836046   | 1          | 2767242                     | -61012                             | <i>TTC34</i>                        | Non-island                    |
| cg15522425   | 1          | 2792637                     | -86407                             | <i>TTC34</i>                        | Non-island                    |
| cg15325070   | 1          | 2792704                     | -86474                             | <i>TTC34</i>                        | Non-island                    |
| cg22877366   | 1          | 12107668                    | -15765                             | <i>TNFRSF8</i>                      | Non-island                    |
| cg15963463   | 1          | 25253237                    | 3533                               | <i>RUNX3</i>                        | Shelf                         |
| cg05656688   | 1          | 25254088                    | 2682                               | <i>RUNX3</i>                        | Shore                         |
| cg25189904   | 1          | 68299493                    | -338                               | <i>GNG12</i>                        | Shore                         |
| cg26764244   | 1          | 68299511                    | -356                               | <i>GNG12</i>                        | Shore                         |
| cg10399789   | 1          | 92945668                    | 3688                               | <i>GFI1</i>                         | Shore                         |
| cg09662411   | 1          | 92946132                    | 3224                               | <i>GFI1</i>                         | Island                        |
| cg06338710   | 1          | 92946187                    | 3169                               | <i>GFI1</i>                         | Island                        |
| cg18146737   | 1          | 92946700                    | 2656                               | <i>GFI1</i>                         | Island                        |
| cg12876356   | 1          | 92946825                    | 2531                               | <i>GFI1</i>                         | Island                        |
| cg18316974   | 1          | 92947035                    | 2321                               | <i>GFI1</i>                         | Island                        |
| cg09935388   | 1          | 92947588                    | 1768                               | <i>GFI1</i>                         | Island                        |
| cg14179389   | 1          | 92947961                    | 1395                               | <i>GFI1</i>                         | Island                        |
| cg19675142   | 1          | 116107015                   | -77558                             | <i>VANGL1</i>                       | Non-island                    |
| cg17442776   | 1          | 147718540                   | -488                               | <i>TRNA_Asn</i>                     | Island                        |
| cg16517298   | 1          | 230413174                   | 15559                              | <i>GALNT2</i>                       | Shelf                         |
| cg19727396   | 1          | 230415185                   | 17570                              | <i>GALNT2</i>                       | Shore                         |
| cg24591105   | 1          | 230415225                   | 17610                              | <i>GALNT2</i>                       | Shore                         |

| Probe      | Chr | Basepair <sup>a</sup> | Distance to TSS <sup>b</sup> | Closest TSS Gene <sup>c</sup> | CpG Island <sup>d</sup> |
|------------|-----|-----------------------|------------------------------|-------------------------------|-------------------------|
| cg00589617 | 1   | 230415343             | 17728                        | <i>GALNT2</i>                 | Island                  |
| cg05697274 | 1   | 230415377             | 17762                        | <i>GALNT2</i>                 | Island                  |
| cg24250902 | 1   | 230415547             | 17932                        | <i>GALNT2</i>                 | Island                  |
| cg03144619 | 1   | 230415668             | 18053                        | <i>GALNT2</i>                 | Island                  |
| cg09368188 | 1   | 245330018             | 11732                        | <i>KIF26B</i>                 | Non-island              |
| cg26119806 | 2   | 18061572              | 1628                         | <i>KCNS3</i>                  | Shore                   |
| cg08026735 | 2   | 98703888              | 294                          | <i>VWA3B</i>                  | Island                  |
| cg18703066 | 2   | 105363536             | 8677                         | <i>LOC284998</i>              | Non-island              |
| cg13547053 | 2   | 179184864             | -106                         | <i>OSBPL6</i>                 | Non-island              |
| cg22057874 | 2   | 179184866             | -104                         | <i>OSBPL6</i>                 | Non-island              |
| cg11641006 | 2   | 235213874             | 149479                       | <i>AX748264</i>               | Non-island              |
| cg18096987 | 3   | 11623873              | -37                          | <i>VGLL4</i>                  | Non-island              |
| cg18722086 | 3   | 113380072             | 9008                         | <i>KIAA2018</i>               | Non-island              |
| cg07553761 | 3   | 160167977             | -351                         | <i>IFT80</i>                  | Island                  |
| cg04098479 | 4   | 1994849               | -878                         | <i>WHSC2</i>                  | Island                  |
| cg16449012 | 4   | 17781880              | 1255                         | <i>FAM184B</i>                | Shore                   |
| cg14349977 | 4   | 187219430             | 32313                        | <i>F11</i>                    | Island                  |
| cg18753646 | 4   | 187219538             | 32421                        | <i>F11</i>                    | Island                  |
| cg17924476 | 5   | 323794                | 1093                         | <i>AHRR</i>                   | Shore                   |
| cg23067299 | 5   | 323907                | 1206                         | <i>AHRR</i>                   | Shore                   |
| cg08606254 | 5   | 323969                | 1268                         | <i>AHRR</i>                   | Shore                   |
| cg12806681 | 5   | 368394                | 45693                        | <i>AHRR</i>                   | Shore                   |
| cg03991871 | 5   | 368447                | 45746                        | <i>AHRR</i>                   | Shore                   |
| cg23916896 | 5   | 368804                | 46103                        | <i>AHRR</i>                   | Shore                   |
| cg11902777 | 5   | 368843                | 46142                        | <i>AHRR</i>                   | Shore                   |
| cg05575921 | 5   | 373378                | -47656                       | <i>AHRR</i>                   | Shore                   |
| cg14817490 | 5   | 392920                | -28114                       | <i>AHRR</i>                   | Non-island              |



| Probe      | Chr | Basepair <sup>a</sup> | Distance to TSS <sup>b</sup> | Closest TSS Gene <sup>c</sup> | CpG Island <sup>d</sup> |
|------------|-----|-----------------------|------------------------------|-------------------------------|-------------------------|
| cg21161138 | 5   | 399360                | -21674                       | <i>AHRR</i>                   | Non-island              |
| cg22937882 | 5   | 405774                | -15260                       | <i>AHRR</i>                   | Non-island              |
| cg07448928 | 5   | 427755                | -4384                        | <i>AHRR</i>                   | Non-island              |
| cg10841124 | 5   | 433274                | 1135                         | <i>AHRR</i>                   | Non-island              |
| cg26954197 | 5   | 436816                | 4677                         | <i>AHRR</i>                   | Non-island              |
| cg22879098 | 5   | 672845                | 6048                         | <i>TPPP</i>                   | Non-island              |
| cg01952185 | 5   | 134813213             | -25124                       | <i>TIFAB</i>                  | Non-island              |
| cg11429111 | 5   | 134813329             | -25240                       | <i>TIFAB</i>                  | Non-island              |
| cg25383593 | 5   | 134827820             | -39731                       | <i>TIFAB</i>                  | Shore                   |
| cg25415695 | 5   | 134828036             | -39947                       | <i>TIFAB</i>                  | Shore                   |
| cg04800195 | 5   | 180287904             | 382                          | <i>ZFP62</i>                  | Island                  |
| cg26889659 | 6   | 684090                | 9019                         | <i>EXOC2</i>                  | Non-island              |
| cg18694169 | 6   | 28227079              | -18                          | <i>NKAPL</i>                  | Island                  |
| cg10253847 | 6   | 28227085              | -12                          | <i>NKAPL</i>                  | Island                  |
| cg01031101 | 6   | 28227091              | -6                           | <i>NKAPL</i>                  | Island                  |
| cg09523275 | 6   | 28227093              | -4                           | <i>NKAPL</i>                  | Island                  |
| cg18675097 | 6   | 28227127              | 30                           | <i>NKAPL</i>                  | Island                  |
| cg18828927 | 6   | 29275263              | 797                          | <i>OR14J1</i>                 | Non-island              |
| cg14027333 | 6   | 32116317              | 3383                         | <i>PRRT1</i>                  | Shore                   |
| cg02404974 | 6   | 41376295              | 72768                        | <i>NCR2</i>                   | Shore                   |
| cg14086013 | 6   | 41604740              | -1454                        | <i>MDFI</i>                   | Island                  |
| cg03354508 | 6   | 147769498             | -60329                       | <i>SAMD5</i>                  | Non-island              |
| cg17345450 | 6   | 166259938             | 140046                       | <i>AK090688</i>               | Non-island              |
| cg00794911 | 6   | 166260532             | 139452                       | <i>AK090688</i>               | Non-island              |
| cg18132363 | 6   | 166260572             | 139412                       | <i>AK090688</i>               | Non-island              |
| cg11625488 | 6   | 170403557             | 168100                       | <i>LOC154449</i>              | Shore                   |
| cg10312186 | 6   | 170403583             | 168074                       | <i>LOC154449</i>              | Shore                   |

| Probe      | Chr | Basepair <sup>a</sup> | Distance to TSS <sup>b</sup> | Closest TSS Gene <sup>c</sup> | CpG Island <sup>d</sup> |
|------------|-----|-----------------------|------------------------------|-------------------------------|-------------------------|
| cg16944958 | 6   | 170403962             | 167695                       | <i>LOC154449</i>              | Shore                   |
| cg07249149 | 7   | 1035363               | 12529                        | <i>CYP2W1</i>                 | Non-island              |
| cg07104557 | 7   | 1036653               | 13819                        | <i>CYP2W1</i>                 | Shelf                   |
| cg19089201 | 7   | 45002287              | 6699                         | <i>BC041623</i>               | Island                  |
| cg22132788 | 7   | 45002486              | 6500                         | <i>BC041623</i>               | Island                  |
| cg04180046 | 7   | 45002736              | 6250                         | <i>BC041623</i>               | Island                  |
| cg12803068 | 7   | 45002919              | 6067                         | <i>BC041623</i>               | Shore                   |
| cg16459265 | 7   | 45025080              | 29                           | <i>SNORA9</i>                 | Shore                   |
| cg04598670 | 7   | 68697651              | 168638                       | <i>U6</i>                     | Non-island              |
| cg18209323 | 7   | 92672878              | 62532                        | <i>SAMD9</i>                  | Island                  |
| cg20174893 | 7   | 97600926              | 712                          | <i>MGC72080</i>               | Shore                   |
| cg07464358 | 7   | 100952364             | 744                          | <i>BC032716</i>               | Non-island              |
| cg25949550 | 7   | 145814306             | 854                          | <i>CNTNAP2</i>                | Shore                   |
| cg15578140 | 7   | 147718109             | -79507                       | <i>MIR548F3</i>               | Non-island              |
| cg00433296 | 8   | 22223852              | -909                         | <i>SLC39A14</i>               | Shore                   |
| cg13455434 | 8   | 30243930              | -1013                        | <i>AK057935</i>               | Shore                   |
| cg02892925 | 8   | 60032926              | -1159                        | <i>TOX</i>                    | Shore                   |
| cg07211044 | 8   | 60032983              | -1216                        | <i>TOX</i>                    | Shore                   |
| cg18794473 | 8   | 77617694              | 1417                         | <i>ZFHX4</i>                  | Non-island              |
| cg04640109 | 8   | 106330173             | -973                         | <i>ZFPM2</i>                  | Shore                   |
| cg11064524 | 8   | 118875129             | 225369                       | <i>AK025288</i>               | Non-island              |
| cg13459104 | 9   | 98849721              | -7558                        | <i>LOC158435</i>              | Non-island              |
| cg01825213 | 9   | 98979965              | 84469                        | <i>HSD17B3</i>                | Shore                   |
| cg13784312 | 9   | 134609065             | 3860                         | <i>RAPGEF1</i>                | Non-island              |
| cg13822849 | 9   | 137999757             | 2272                         | <i>OLFM1</i>                  | Shelf                   |
| cg20344448 | 10  | 14372431              | 435                          | <i>FRMD4A</i>                 | Non-island              |
| cg11813497 | 10  | 14372879              | -13                          | <i>FRMD4A</i>                 | Non-island              |

| Probe      | Chr | Basepair <sup>a</sup> | Distance to TSS <sup>b</sup> | Closest TSS Gene <sup>c</sup> | CpG Island <sup>d</sup> |
|------------|-----|-----------------------|------------------------------|-------------------------------|-------------------------|
| cg25464840 | 10  | 14372910              | -44                          | <i>FRMD4A</i>                 | Non-island              |
| cg15507334 | 10  | 14372913              | -47                          | <i>FRMD4A</i>                 | Non-island              |
| cg03486379 | 10  | 34391256              | -7552                        | <i>AX765719</i>               | Non-island              |
| cg24239148 | 10  | 63422841              | 123                          | <i>C10orf107</i>              | Island                  |
| cg06813382 | 10  | 81967195              | -270                         | <i>LOC439990</i>              | Island                  |
| cg08626436 | 10  | 88555339              | 38944                        | <i>BMPR1A</i>                 | Non-island              |
| cg09488203 | 10  | 95327884              | 1463                         | <i>O3FAR1</i>                 | Shore                   |
| cg05593775 | 10  | 102778743             | 12171                        | <i>PDZD7</i>                  | Island                  |
| cg18621256 | 10  | 119221444             | 80480                        | <i>EMX2OS</i>                 | Non-island              |
| cg10673740 | 10  | 121411826             | 945                          | <i>BAG3</i>                   | Island                  |
| cg22043296 | 11  | 1892139               | -14                          | <i>LSP1</i>                   | Island                  |
| cg19631472 | 11  | 18415641              | -294                         | <i>LDHA</i>                   | Shore                   |
| cg10788371 | 11  | 76381040              | 4                            | <i>LRRC32</i>                 | Shore                   |
| cg09063262 | 11  | 85358506              | -456                         | <i>TMEM126A</i>               | Shore                   |
| cg19563365 | 11  | 86508399              | -3091                        | <i>PRSS23</i>                 | Shelf                   |
| cg02356218 | 11  | 124352048             | -41067                       | <i>OR8B8</i>                  | Non-island              |
| cg26827653 | 11  | 125366540             | -334                         | <i>FEZ1</i>                   | Shore                   |
| cg10520740 | 12  | 1952798               | 10412                        | <i>CACNA2D4</i>               | Non-island              |
| cg22171758 | 12  | 54146133              | -24826                       | <i>CALCOCO1</i>               | Shore                   |
| cg25122233 | 12  | 54412506              | 1865                         | <i>HOXC5</i>                  | Shore                   |
| cg03453449 | 12  | 95945120              | 143                          | <i>USP44</i>                  | Shelf                   |
| cg25632883 | 12  | 109250438             | 921                          | <i>SSH1</i>                   | Shore                   |
| cg24698536 | 12  | 109250515             | 844                          | <i>SSH1</i>                   | Shore                   |
| cg12492906 | 12  | 109250545             | 814                          | <i>SSH1</i>                   | Shore                   |
| cg00029284 | 12  | 111731203             | 70028                        | <i>FAM109A</i>                | Non-island              |
| cg26103179 | 12  | 119591664             | -24930                       | <i>HSPB8</i>                  | Shore                   |
| cg12160087 | 12  | 120531986             | 22561                        | <i>CCDC64</i>                 | Shelf                   |

| Probe      | Chr | Basepair <sup>a</sup> | Distance to TSS <sup>b</sup> | Closest TSS Gene <sup>c</sup> | CpG Island <sup>d</sup> |
|------------|-----|-----------------------|------------------------------|-------------------------------|-------------------------|
| cg15893360 | 12  | 120700361             | 3213                         | <i>PXN</i>                    | Shelf                   |
| cg08698721 | 14  | 101294147             | -1223                        | <i>MEG3</i>                   | Island                  |
| cg04291079 | 14  | 101294430             | -940                         | <i>MEG3</i>                   | Island                  |
| cg26554302 | 15  | 22467326              | -18540                       | <i>AJ004954</i>               | Non-island              |
| cg03796381 | 15  | 36650033              | -221778                      | <i>C15orf41</i>               | Non-island              |
| cg10078511 | 15  | 39872032              | -1247                        | <i>THBS1</i>                  | Shore                   |
| cg23849826 | 15  | 39872186              | -1093                        | <i>THBS1</i>                  | Shore                   |
| cg16231923 | 15  | 73923634              | 2119                         | <i>NPTN</i>                   | Shore                   |
| cg00213123 | 15  | 75019070              | -1193                        | <i>CYP1A1</i>                 | Island                  |
| cg05549655 | 15  | 75019143              | -1266                        | <i>CYP1A1</i>                 | Island                  |
| cg17852385 | 15  | 75019188              | -1311                        | <i>CYP1A1</i>                 | Island                  |
| cg13570656 | 15  | 75019196              | -1319                        | <i>CYP1A1</i>                 | Island                  |
| cg12101586 | 15  | 75019203              | -1326                        | <i>CYP1A1</i>                 | Island                  |
| cg22549041 | 15  | 75019251              | -1374                        | <i>CYP1A1</i>                 | Island                  |
| cg11924019 | 15  | 75019283              | -1406                        | <i>CYP1A1</i>                 | Island                  |
| cg18092474 | 15  | 75019302              | -1425                        | <i>CYP1A1</i>                 | Island                  |
| cg26516004 | 15  | 75019376              | -1499                        | <i>CYP1A1</i>                 | Shore                   |
| cg01359532 | 15  | 75045126              | 3943                         | <i>CYP1A2</i>                 | Non-island              |
| cg04807108 | 15  | 78697933              | -32584                       | <i>IREB2</i>                  | Non-island              |
| cg12937151 | 15  | 87758226              | -361933                      | <i>LINC00052</i>              | Non-island              |
| cg04459939 | 15  | 90291141              | 3399                         | <i>MESP1</i>                  | Shelf                   |
| cg23335299 | 15  | 90291756              | 2784                         | <i>MESP1</i>                  | Shore                   |
| cg13834112 | 15  | 90361639              | -3567                        | <i>ANPEP</i>                  | Shelf                   |
| cg26804595 | 16  | 749581                | -3556                        | <i>FBXL16</i>                 | Shore                   |
| cg13928411 | 16  | 22103791              | -71                          | <i>VWA3A</i>                  | Non-island              |
| cg09743950 | 16  | 31341875              | 5314                         | <i>DL489986</i>               | Shore                   |
| cg00253658 | 16  | 54210496              | 109882                       | <i>IRX3</i>                   | Non-island              |

| Probe      | Chr | Basepair <sup>a</sup> | Distance to TSS <sup>b</sup> | Closest TSS Gene <sup>c</sup> | CpG Island <sup>d</sup> |
|------------|-----|-----------------------|------------------------------|-------------------------------|-------------------------|
| cg26681628 | 16  | 54210550              | 109828                       | <i>IRX3</i>                   | Non-island              |
| cg03687532 | 16  | 54228358              | 92020                        | <i>IRX3</i>                   | Island                  |
| cg03177666 | 16  | 54365103              | -44725                       | <i>IRX3</i>                   | Non-island              |
| cg08755703 | 16  | 54394989              | -74611                       | <i>IRX3</i>                   | Non-island              |
| cg24173182 | 17  | 1961286               | 1302                         | <i>HIC1</i>                   | Island                  |
| cg05568941 | 17  | 38517913              | 1007                         | <i>GJD3</i>                   | Shore                   |
| cg06949812 | 17  | 38517993              | 1087                         | <i>GJD3</i>                   | Shore                   |
| cg11096905 | 17  | 63535567              | 19287                        | <i>AXIN2</i>                  | Shore                   |
| cg23928512 | 17  | 79970192              | 10581                        | <i>STRA13</i>                 | Shelf                   |
| cg23664708 | 17  | 80196903              | 3254                         | <i>SLC16A3</i>                | Shore                   |
| cg06509837 | 19  | 610955                | 21063                        | <i>HCN2</i>                   | Shore                   |
| cg26580869 | 19  | 611506                | 21614                        | <i>HCN2</i>                   | Island                  |
| cg02010738 | 19  | 2095466               | 803                          | <i>MOB3A</i>                  | Island                  |
| cg08097581 | 19  | 15528589              | 1244                         | <i>AKAP8L</i>                 | Shore                   |
| cg26652413 | 19  | 17007057              | 727                          | <i>CPAMD8</i>                 | Shore                   |
| cg23458168 | 19  | 30864867              | 1540                         | <i>ZNF536</i>                 | Shore                   |
| cg16547579 | 20  | 4954333               | 27812                        | <i>SLC23A2</i>                | Non-island              |
| cg20244340 | 20  | 19193989              | 700                          | <i>SLC24A3</i>                | Shore                   |
| cg11868728 | 20  | 22568116              | -2015                        | <i>FOXA2</i>                  | Shore                   |
| cg20274009 | 20  | 32450846              | 51737                        | <i>CHMP4B</i>                 | Shore                   |
| cg07339236 | 20  | 50312490              | 1552                         | <i>ATP9A</i>                  | Non-island              |
| cg20643029 | 21  | 37915044              | -146                         | <i>CLDN14</i>                 | Non-island              |
| cg12426652 | 21  | 37915056              | -158                         | <i>CLDN14</i>                 | Non-island              |
| cg04478905 | 21  | 37915091              | -193                         | <i>CLDN14</i>                 | Non-island              |
| cg26441486 | 22  | 50317300              | 5018                         | <i>CRELD2</i>                 | Shore                   |

Abbreviations: Chr: chromosome, TSS: transcription start site

<sup>a</sup>Physical location in basepairs (Human genome build GRCh37/hg19). <sup>b</sup>Distance in basepairs to the closest TSS (Price et al. 2013).

<sup>c</sup>Gene with the closest TSS (Price et al. 2013). <sup>d</sup>CpG island annotation based on Illumina's 450K manifest file v1.2.

**Table S5.** Distribution of differentially methylated CpG sites by genomic region [n (%)].<sup>a</sup>

| <b>Description</b>                                       | <b>Non-Island</b> | <b>Island</b> | <b>Shelf</b> | <b>Shore</b> | <b>P-value<sup>b</sup></b> |
|----------------------------------------------------------|-------------------|---------------|--------------|--------------|----------------------------|
| <b>Genome-wide significant CpG sites (FDR q&lt;0.05)</b> |                   |               |              |              |                            |
| Decreased methylation (N=80)                             | 24 (30.0)         | 16 (20.0)     | 6 (7.5)      | 34 (42.5)    | 0.003*                     |
| Increased methylation (N=105)                            | 36 (34.3)         | 33 (31.4)     | 5 (4.8)      | 31 (29.5)    | 0.061                      |
| All (N=185)                                              | 60 (32.4)         | 49 (26.5)     | 11 (5.9)     | 65 (35.1)    | 0.002*                     |
| <b>Illumina Human Methylation 450 BeadChip CpG sites</b> |                   |               |              |              |                            |
| Decreased methylation (N=175106)                         | 63936 (36.5)      | 50440 (28.8)  | 17522 (10.0) | 43208 (24.7) | NA                         |
| Increased methylation (N=182214)                         | 72959 (40.0)      | 47108 (25.9)  | 19620 (10.8) | 42527 (23.3) | NA                         |
| All (N=357320)                                           | 136895 (38.3)     | 97548 (27.3)  | 37142 (10.4) | 85735 (24.0) | NA                         |

Abbreviations: NA: not applicable

<sup>a</sup>Annotation based on Illumina's 450K manifest file v1.2. <sup>b</sup>Chi-square test; Illumina Human Methylation 450 BeadChip used as the reference.

\*P-value < 0.05

**Table S6.** Genome-wide significant CpG sites: dose-response evaluation by maternal smoking status.<sup>a</sup>

| <b>Probe</b> | <b>Non-active<sup>b</sup></b> | <b>Light<sup>b</sup></b> | <b>Moderate / Heavy<sup>b</sup></b> | <b>Coeff<sup>c</sup></b> | <b>P-value<sup>c</sup></b> | <b>q-value<sup>c</sup></b> | <b>Dose-response<sup>d</sup></b> |
|--------------|-------------------------------|--------------------------|-------------------------------------|--------------------------|----------------------------|----------------------------|----------------------------------|
| cg06415891   | 0.699 ± 0.002                 | 0.714 ± 0.005            | 0.72 ± 0.005                        | 0.0121                   | 1.13E-06                   | 4.77E-03                   | Yes                              |
| cg20816361   | 0.734 ± 0.002                 | 0.746 ± 0.004            | 0.752 ± 0.004                       | 0.0103                   | 8.91E-07                   | 4.02E-03                   | Yes                              |
| cg12443001   | 0.7 ± 0.001                   | 0.712 ± 0.003            | 0.704 ± 0.003                       | 0.0045                   | 1.58E-03                   | 4.62E-01                   | No                               |
| cg08142858   | 0.789 ± 0.001                 | 0.794 ± 0.003            | 0.793 ± 0.002                       | 0.0045                   | 8.36E-05                   | 1.16E-01                   | No                               |
| cg15836046   | 0.884 ± 0.001                 | 0.89 ± 0.002             | 0.889 ± 0.001                       | 0.0035                   | 3.22E-06                   | 1.15E-02                   | No                               |
| cg15522425   | 0.604 ± 0.002                 | 0.616 ± 0.004            | 0.62 ± 0.003                        | 0.0084                   | 1.92E-07                   | 1.18E-03                   | Yes                              |
| cg15325070   | 0.781 ± 0.002                 | 0.793 ± 0.003            | 0.804 ± 0.003                       | 0.0116                   | 3.24E-11                   | 3.73E-07                   | Yes                              |
| cg22877366   | 0.391 ± 0.002                 | 0.369 ± 0.005            | 0.376 ± 0.005                       | -0.0105                  | 2.09E-04                   | 1.97E-01                   | No                               |
| cg15963463   | 0.334 ± 0.002                 | 0.326 ± 0.004            | 0.327 ± 0.004                       | -0.0062                  | 3.59E-05                   | 7.49E-02                   | No                               |
| cg05656688   | 0.783 ± 0.002                 | 0.766 ± 0.004            | 0.77 ± 0.004                        | -0.0073                  | 1.41E-04                   | 1.57E-01                   | No                               |
| cg25189904   | 0.598 ± 0.002                 | 0.577 ± 0.005            | 0.582 ± 0.004                       | -0.0109                  | 2.14E-07                   | 1.25E-03                   | No                               |
| cg26764244   | 0.311 ± 0.002                 | 0.291 ± 0.005            | 0.285 ± 0.005                       | -0.0143                  | 3.98E-10                   | 4.07E-06                   | Yes                              |
| cg10399789   | 0.868 ± 0.002                 | 0.856 ± 0.004            | 0.838 ± 0.005                       | -0.0113                  | 1.25E-12                   | 1.59E-08                   | Yes                              |
| cg09662411   | 0.809 ± 0.003                 | 0.783 ± 0.006            | 0.748 ± 0.008                       | -0.0241                  | 9.84E-26                   | 3.62E-21                   | Yes                              |
| cg06338710   | 0.895 ± 0.002                 | 0.877 ± 0.005            | 0.851 ± 0.006                       | -0.0162                  | 4.33E-29                   | 2.28E-24                   | Yes                              |
| cg18146737   | 0.897 ± 0.004                 | 0.85 ± 0.01              | 0.795 ± 0.012                       | -0.0464                  | 2.80E-41                   | 3.44E-36                   | Yes                              |
| cg12876356   | 0.831 ± 0.004                 | 0.78 ± 0.009             | 0.729 ± 0.01                        | -0.0478                  | 5.92E-40                   | 4.36E-35                   | Yes                              |
| cg18316974   | 0.94 ± 0.003                  | 0.912 ± 0.006            | 0.88 ± 0.008                        | -0.0231                  | 2.19E-36                   | 1.34E-31                   | Yes                              |
| cg09935388   | 0.827 ± 0.004                 | 0.765 ± 0.009            | 0.72 ± 0.009                        | -0.0569                  | 2.18E-41                   | 3.44E-36                   | Yes                              |
| cg14179389   | 0.307 ± 0.004                 | 0.255 ± 0.008            | 0.229 ± 0.008                       | -0.0418                  | 1.99E-23                   | 6.11E-19                   | Yes                              |
| cg19675142   | 0.51 ± 0.002                  | 0.521 ± 0.004            | 0.525 ± 0.004                       | 0.0085                   | 6.01E-06                   | 1.93E-02                   | Yes                              |
| cg17442776   | 0.215 ± 0.001                 | 0.223 ± 0.002            | 0.223 ± 0.002                       | 0.0052                   | 1.91E-05                   | 4.67E-02                   | Yes                              |
| cg16517298   | 0.479 ± 0.004                 | 0.44 ± 0.007             | 0.464 ± 0.008                       | -0.0124                  | 8.55E-04                   | 3.67E-01                   | No                               |
| cg19727396   | 0.606 ± 0.002                 | 0.589 ± 0.005            | 0.583 ± 0.005                       | -0.0112                  | 1.27E-05                   | 3.46E-02                   | Yes                              |
| cg24591105   | 0.47 ± 0.003                  | 0.445 ± 0.005            | 0.443 ± 0.006                       | -0.0144                  | 1.68E-07                   | 1.06E-03                   | Yes                              |



| Probe      | Non-active <sup>b</sup> | Light <sup>b</sup> | Moderate / Heavy <sup>b</sup> | Coeff <sup>c</sup> | P-value <sup>c</sup> | q-value <sup>c</sup> | Dose-response <sup>d</sup> |
|------------|-------------------------|--------------------|-------------------------------|--------------------|----------------------|----------------------|----------------------------|
| cg00589617 | 0.345 ± 0.003           | 0.318 ± 0.006      | 0.315 ± 0.007                 | -0.0171            | 3.78E-07             | 2.14E-03             | Yes                        |
| cg05697274 | 0.408 ± 0.003           | 0.384 ± 0.006      | 0.384 ± 0.005                 | -0.0151            | 5.44E-08             | 3.85E-04             | Yes                        |
| cg24250902 | 0.303 ± 0.003           | 0.276 ± 0.007      | 0.27 ± 0.007                  | -0.0192            | 2.54E-08             | 1.91E-04             | Yes                        |
| cg03144619 | 0.431 ± 0.003           | 0.396 ± 0.007      | 0.391 ± 0.008                 | -0.0214            | 1.64E-08             | 1.28E-04             | Yes                        |
| cg09368188 | 0.497 ± 0.003           | 0.519 ± 0.006      | 0.535 ± 0.007                 | 0.0175             | 1.45E-08             | 1.16E-04             | Yes                        |
| cg26119806 | 0.66 ± 0.002            | 0.645 ± 0.004      | 0.641 ± 0.004                 | -0.0108            | 4.11E-07             | 2.26E-03             | Yes                        |
| cg08026735 | 0.577 ± 0.001           | 0.589 ± 0.003      | 0.588 ± 0.003                 | 0.0065             | 2.95E-05             | 6.71E-02             | No                         |
| cg18703066 | 0.959 ± 0.001           | 0.955 ± 0.002      | 0.955 ± 0.002                 | -0.0035            | 3.52E-11             | 3.93E-07             | Yes                        |
| cg13547053 | 0.845 ± 0.001           | 0.856 ± 0.003      | 0.856 ± 0.003                 | 0.006              | 4.46E-05             | 8.42E-02             | No                         |
| cg22057874 | 0.596 ± 0.002           | 0.608 ± 0.003      | 0.609 ± 0.003                 | 0.0073             | 3.26E-05             | 7.19E-02             | No                         |
| cg11641006 | 0.707 ± 0.002           | 0.722 ± 0.004      | 0.72 ± 0.004                  | 0.0092             | 1.71E-05             | 4.25E-02             | No                         |
| cg18096987 | 0.501 ± 0.002           | 0.48 ± 0.004       | 0.495 ± 0.004                 | -0.0084            | 4.55E-05             | 8.54E-02             | No                         |
| cg18722086 | 0.919 ± 0.001           | 0.923 ± 0.001      | 0.925 ± 0.001                 | 0.0036             | 1.06E-06             | 4.52E-03             | Yes                        |
| cg07553761 | 0.048 ± 0.001           | 0.053 ± 0.001      | 0.054 ± 0.001                 | 0.0026             | 9.66E-06             | 2.86E-02             | Yes                        |
| cg04098479 | 0.958 ± 0               | 0.961 ± 0.001      | 0.961 ± 0.001                 | 0.0021             | 5.76E-07             | 2.89E-03             | Yes                        |
| cg16449012 | 0.718 ± 0.002           | 0.728 ± 0.004      | 0.73 ± 0.003                  | 0.0061             | 5.64E-05             | 9.13E-02             | No                         |
| cg14349977 | 0.219 ± 0.003           | 0.199 ± 0.006      | 0.197 ± 0.006                 | -0.0133            | 1.44E-05             | 3.73E-02             | Yes                        |
| cg18753646 | 0.165 ± 0.003           | 0.141 ± 0.006      | 0.149 ± 0.005                 | -0.0111            | 4.82E-05             | 8.67E-02             | No                         |
| cg17924476 | 0.326 ± 0.002           | 0.336 ± 0.004      | 0.357 ± 0.004                 | 0.0121             | 1.67E-08             | 1.28E-04             | Yes                        |
| cg23067299 | 0.82 ± 0.002            | 0.838 ± 0.004      | 0.846 ± 0.004                 | 0.0139             | 4.39E-13             | 6.47E-09             | Yes                        |
| cg08606254 | 0.857 ± 0.001           | 0.873 ± 0.003      | 0.882 ± 0.003                 | 0.0121             | 2.13E-15             | 3.74E-11             | Yes                        |
| cg12806681 | 0.918 ± 0.001           | 0.906 ± 0.003      | 0.913 ± 0.002                 | -0.0047            | 3.05E-06             | 1.11E-02             | No                         |
| cg03991871 | 0.891 ± 0.002           | 0.882 ± 0.003      | 0.885 ± 0.003                 | -0.0052            | 5.71E-06             | 1.87E-02             | No                         |
| cg23916896 | 0.186 ± 0.002           | 0.165 ± 0.004      | 0.163 ± 0.004                 | -0.0127            | 6.47E-08             | 4.50E-04             | Yes                        |
| cg11902777 | 0.049 ± 0.001           | 0.039 ± 0.001      | 0.042 ± 0.002                 | -0.0045            | 2.97E-09             | 2.73E-05             | No                         |
| cg05575921 | 0.891 ± 0.002           | 0.855 ± 0.005      | 0.84 ± 0.005                  | -0.0294            | 3.55E-74             | 1.31E-68             | Yes                        |
| cg14817490 | 0.313 ± 0.002           | 0.288 ± 0.005      | 0.296 ± 0.005                 | -0.0122            | 1.35E-07             | 8.91E-04             | No                         |

| Probe      | Non-active <sup>b</sup> | Light <sup>b</sup> | Moderate / Heavy <sup>b</sup> | Coeff <sup>c</sup> | P-value <sup>c</sup> | q-value <sup>c</sup> | Dose-response <sup>d</sup> |
|------------|-------------------------|--------------------|-------------------------------|--------------------|----------------------|----------------------|----------------------------|
| cg21161138 | 0.822 ± 0.001           | 0.804 ± 0.002      | 0.8 ± 0.003                   | -0.0113            | 4.94E-24             | 1.65E-19             | Yes                        |
| cg22937882 | 0.903 ± 0.001           | 0.915 ± 0.001      | 0.916 ± 0.002                 | 0.0079             | 1.35E-19             | 3.55E-15             | Yes                        |
| cg07448928 | 0.847 ± 0.001           | 0.853 ± 0.002      | 0.854 ± 0.002                 | 0.0044             | 3.55E-05             | 7.47E-02             | No                         |
| cg10841124 | 0.943 ± 0.001           | 0.948 ± 0.001      | 0.949 ± 0.001                 | 0.0025             | 4.26E-06             | 1.47E-02             | Yes                        |
| cg26954197 | 0.914 ± 0.001           | 0.921 ± 0.002      | 0.92 ± 0.001                  | 0.0038             | 7.28E-06             | 2.23E-02             | No                         |
| cg22879098 | 0.443 ± 0.004           | 0.411 ± 0.008      | 0.423 ± 0.009                 | -0.0158            | 2.12E-04             | 1.97E-01             | No                         |
| cg01952185 | 0.636 ± 0.003           | 0.659 ± 0.006      | 0.675 ± 0.006                 | 0.0185             | 5.23E-13             | 7.13E-09             | Yes                        |
| cg11429111 | 0.766 ± 0.003           | 0.793 ± 0.006      | 0.807 ± 0.006                 | 0.0194             | 4.80E-13             | 6.80E-09             | Yes                        |
| cg25383593 | 0.129 ± 0.002           | 0.139 ± 0.003      | 0.144 ± 0.003                 | 0.0072             | 2.48E-06             | 9.53E-03             | Yes                        |
| cg25415695 | 0.602 ± 0.002           | 0.611 ± 0.004      | 0.616 ± 0.004                 | 0.0076             | 1.37E-05             | 3.66E-02             | Yes                        |
| cg04800195 | 0.042 ± 0               | 0.046 ± 0.001      | 0.045 ± 0.001                 | 0.0019             | 2.29E-05             | 5.40E-02             | No                         |
| cg26889659 | 0.314 ± 0.007           | 0.279 ± 0.013      | 0.256 ± 0.012                 | -0.0346            | 5.91E-09             | 4.94E-05             | Yes                        |
| cg18694169 | 0.159 ± 0.002           | 0.181 ± 0.005      | 0.176 ± 0.004                 | 0.0101             | 4.76E-06             | 1.61E-02             | No                         |
| cg10253847 | 0.071 ± 0.001           | 0.088 ± 0.003      | 0.085 ± 0.003                 | 0.007              | 1.04E-06             | 4.50E-03             | No                         |
| cg01031101 | 0.253 ± 0.002           | 0.278 ± 0.005      | 0.281 ± 0.005                 | 0.0127             | 3.22E-08             | 2.32E-04             | Yes                        |
| cg09523275 | 0.317 ± 0.002           | 0.341 ± 0.005      | 0.338 ± 0.004                 | 0.009              | 5.10E-05             | 8.95E-02             | No                         |
| cg18675097 | 0.486 ± 0.003           | 0.524 ± 0.007      | 0.513 ± 0.007                 | 0.013              | 2.87E-04             | 2.27E-01             | No                         |
| cg18828927 | 0.772 ± 0.001           | 0.779 ± 0.002      | 0.778 ± 0.002                 | 0.0047             | 5.97E-05             | 9.40E-02             | No                         |
| cg14027333 | 0.056 ± 0.001           | 0.052 ± 0.001      | 0.052 ± 0.001                 | -0.0027            | 5.42E-05             | 9.06E-02             | No                         |
| cg02404974 | 0.772 ± 0.002           | 0.789 ± 0.004      | 0.785 ± 0.004                 | 0.0078             | 2.19E-04             | 1.99E-01             | No                         |
| cg14086013 | 0.746 ± 0.002           | 0.76 ± 0.003       | 0.761 ± 0.004                 | 0.0072             | 2.20E-05             | 5.29E-02             | No                         |
| cg03354508 | 0.869 ± 0.001           | 0.878 ± 0.003      | 0.881 ± 0.003                 | 0.0068             | 8.81E-06             | 2.64E-02             | Yes                        |
| cg17345450 | 0.792 ± 0.002           | 0.782 ± 0.003      | 0.775 ± 0.003                 | -0.0068            | 8.04E-06             | 2.45E-02             | Yes                        |
| cg00794911 | 0.889 ± 0.001           | 0.88 ± 0.003       | 0.876 ± 0.002                 | -0.0063            | 5.81E-07             | 2.89E-03             | Yes                        |
| cg18132363 | 0.453 ± 0.002           | 0.428 ± 0.005      | 0.421 ± 0.005                 | -0.0166            | 1.09E-10             | 1.18E-06             | Yes                        |
| cg11625488 | 0.461 ± 0.003           | 0.439 ± 0.008      | 0.445 ± 0.008                 | -0.0124            | 3.49E-05             | 7.42E-02             | No                         |
| cg10312186 | 0.377 ± 0.003           | 0.349 ± 0.005      | 0.354 ± 0.005                 | -0.0145            | 4.45E-07             | 2.40E-03             | No                         |

| Probe      | Non-active <sup>b</sup> | Light <sup>b</sup> | Moderate / Heavy <sup>b</sup> | Coeff <sup>c</sup> | P-value <sup>c</sup> | q-value <sup>c</sup> | Dose-response <sup>d</sup> |
|------------|-------------------------|--------------------|-------------------------------|--------------------|----------------------|----------------------|----------------------------|
| cg16944958 | 0.814 ± 0.002           | 0.805 ± 0.004      | 0.804 ± 0.004                 | -0.0072            | 4.72E-05             | 8.67E-02             | No                         |
| cg07249149 | 0.673 ± 0.002           | 0.657 ± 0.004      | 0.658 ± 0.004                 | -0.0075            | 5.16E-05             | 8.98E-02             | No                         |
| cg07104557 | 0.718 ± 0.002           | 0.704 ± 0.003      | 0.698 ± 0.003                 | -0.0084            | 1.75E-07             | 1.10E-03             | Yes                        |
| cg19089201 | 0.923 ± 0.002           | 0.942 ± 0.003      | 0.945 ± 0.003                 | 0.0093             | 3.94E-20             | 1.12E-15             | Yes                        |
| cg22132788 | 0.953 ± 0.001           | 0.967 ± 0.002      | 0.969 ± 0.002                 | 0.0084             | 5.01E-17             | 1.03E-12             | Yes                        |
| cg04180046 | 0.531 ± 0.002           | 0.578 ± 0.004      | 0.587 ± 0.005                 | 0.0313             | 2.12E-40             | 1.95E-35             | Yes                        |
| cg12803068 | 0.844 ± 0.003           | 0.893 ± 0.005      | 0.9 ± 0.005                   | 0.0311             | 3.03E-28             | 1.40E-23             | Yes                        |
| cg16459265 | 0.832 ± 0.001           | 0.824 ± 0.002      | 0.818 ± 0.002                 | -0.0061            | 2.13E-07             | 1.25E-03             | Yes                        |
| cg04598670 | 0.609 ± 0.003           | 0.601 ± 0.007      | 0.585 ± 0.006                 | -0.0144            | 6.07E-09             | 4.97E-05             | Yes                        |
| cg18209323 | 0.418 ± 0.002           | 0.436 ± 0.005      | 0.433 ± 0.005                 | 0.0085             | 2.01E-04             | 1.93E-01             | No                         |
| cg20174893 | 0.194 ± 0.002           | 0.183 ± 0.004      | 0.187 ± 0.004                 | -0.0061            | 5.17E-05             | 8.98E-02             | No                         |
| cg07464358 | 0.384 ± 0.002           | 0.392 ± 0.003      | 0.397 ± 0.003                 | 0.0046             | 2.75E-05             | 6.40E-02             | No                         |
| cg25949550 | 0.116 ± 0.001           | 0.096 ± 0.003      | 0.098 ± 0.002                 | -0.0111            | 6.93E-27             | 2.84E-22             | No                         |
| cg15578140 | 0.671 ± 0.001           | 0.686 ± 0.003      | 0.684 ± 0.003                 | 0.0076             | 7.00E-07             | 3.35E-03             | No                         |
| cg00433296 | 0.743 ± 0.002           | 0.753 ± 0.003      | 0.753 ± 0.004                 | 0.0057             | 5.22E-05             | 8.98E-02             | No                         |
| cg13455434 | 0.554 ± 0.004           | 0.573 ± 0.006      | 0.589 ± 0.008                 | 0.0175             | 2.82E-06             | 1.06E-02             | Yes                        |
| cg02892925 | 0.604 ± 0.002           | 0.627 ± 0.005      | 0.618 ± 0.005                 | 0.0105             | 3.62E-05             | 7.49E-02             | No                         |
| cg07211044 | 0.394 ± 0.003           | 0.423 ± 0.006      | 0.416 ± 0.007                 | 0.0122             | 3.31E-05             | 7.22E-02             | No                         |
| cg18794473 | 0.941 ± 0.001           | 0.944 ± 0.001      | 0.944 ± 0.001                 | 0.0024             | 3.73E-05             | 7.55E-02             | No                         |
| cg04640109 | 0.234 ± 0.002           | 0.242 ± 0.003      | 0.253 ± 0.003                 | 0.0071             | 1.03E-06             | 4.50E-03             | Yes                        |
| cg11064524 | 0.795 ± 0.002           | 0.786 ± 0.003      | 0.779 ± 0.003                 | -0.0069            | 1.56E-05             | 4.03E-02             | Yes                        |
| cg13459104 | 0.961 ± 0               | 0.965 ± 0.001      | 0.965 ± 0.001                 | 0.0018             | 5.67E-05             | 9.13E-02             | No                         |
| cg01825213 | 0.667 ± 0.003           | 0.682 ± 0.005      | 0.689 ± 0.006                 | 0.0123             | 1.90E-06             | 7.71E-03             | Yes                        |
| cg13784312 | 0.239 ± 0.003           | 0.219 ± 0.005      | 0.218 ± 0.005                 | -0.0091            | 4.83E-05             | 8.67E-02             | No                         |
| cg13822849 | 0.126 ± 0.001           | 0.138 ± 0.004      | 0.145 ± 0.003                 | 0.0093             | 5.28E-09             | 4.52E-05             | Yes                        |
| cg20344448 | 0.772 ± 0.002           | 0.785 ± 0.003      | 0.789 ± 0.003                 | 0.0089             | 5.11E-09             | 4.48E-05             | Yes                        |
| cg11813497 | 0.773 ± 0.003           | 0.794 ± 0.006      | 0.809 ± 0.005                 | 0.0148             | 3.87E-09             | 3.48E-05             | Yes                        |

| Probe      | Non-active <sup>b</sup> | Light <sup>b</sup> | Moderate / Heavy <sup>b</sup> | Coeff <sup>c</sup> | P-value <sup>c</sup> | q-value <sup>c</sup> | Dose-response <sup>d</sup> |
|------------|-------------------------|--------------------|-------------------------------|--------------------|----------------------|----------------------|----------------------------|
| cg25464840 | 0.688 ± 0.002           | 0.71 ± 0.004       | 0.713 ± 0.003                 | 0.0126             | 1.17E-13             | 1.88E-09             | Yes                        |
| cg15507334 | 0.559 ± 0.002           | 0.579 ± 0.004      | 0.583 ± 0.003                 | 0.0114             | 3.02E-12             | 3.59E-08             | Yes                        |
| cg03486379 | 0.781 ± 0.001           | 0.791 ± 0.003      | 0.789 ± 0.003                 | 0.0055             | 4.12E-05             | 7.86E-02             | No                         |
| cg24239148 | 0.037 ± 0.001           | 0.044 ± 0.002      | 0.045 ± 0.002                 | 0.0041             | 2.90E-05             | 6.64E-02             | No                         |
| cg06813382 | 0.702 ± 0.002           | 0.725 ± 0.004      | 0.718 ± 0.005                 | 0.0093             | 6.20E-05             | 9.55E-02             | No                         |
| cg08626436 | 0.486 ± 0.004           | 0.511 ± 0.008      | 0.538 ± 0.008                 | 0.0221             | 7.68E-08             | 5.24E-04             | Yes                        |
| cg09488203 | 0.158 ± 0.001           | 0.166 ± 0.003      | 0.167 ± 0.002                 | 0.0053             | 1.34E-05             | 3.61E-02             | Yes                        |
| cg05593775 | 0.492 ± 0.002           | 0.507 ± 0.005      | 0.521 ± 0.005                 | 0.0108             | 8.45E-07             | 3.89E-03             | Yes                        |
| cg18621256 | 0.526 ± 0.002           | 0.507 ± 0.003      | 0.514 ± 0.004                 | -0.0071            | 2.87E-05             | 6.60E-02             | No                         |
| cg10673740 | 0.351 ± 0.002           | 0.362 ± 0.005      | 0.381 ± 0.005                 | 0.013              | 2.04E-07             | 1.23E-03             | Yes                        |
| cg22043296 | 0.769 ± 0.002           | 0.752 ± 0.004      | 0.755 ± 0.004                 | -0.0059            | 2.54E-04             | 2.14E-01             | No                         |
| cg19631472 | 0.477 ± 0.001           | 0.467 ± 0.003      | 0.464 ± 0.003                 | -0.0072            | 9.99E-07             | 4.43E-03             | Yes                        |
| cg10788371 | 0.384 ± 0.001           | 0.374 ± 0.003      | 0.376 ± 0.003                 | -0.0054            | 1.59E-04             | 1.69E-01             | No                         |
| cg09063262 | 0.311 ± 0.003           | 0.299 ± 0.006      | 0.282 ± 0.005                 | -0.0151            | 7.83E-07             | 3.65E-03             | Yes                        |
| cg19563365 | 0.887 ± 0.001           | 0.892 ± 0.002      | 0.895 ± 0.002                 | 0.0044             | 1.18E-05             | 3.30E-02             | Yes                        |
| cg02356218 | 0.543 ± 0.002           | 0.531 ± 0.004      | 0.529 ± 0.004                 | -0.0081            | 1.90E-05             | 4.67E-02             | Yes                        |
| cg26827653 | 0.719 ± 0.002           | 0.727 ± 0.003      | 0.736 ± 0.004                 | 0.0086             | 1.44E-06             | 6.05E-03             | Yes                        |
| cg10520740 | 0.805 ± 0.001           | 0.8 ± 0.002        | 0.79 ± 0.002                  | -0.0065            | 1.33E-12             | 1.63E-08             | Yes                        |
| cg22171758 | 0.792 ± 0.002           | 0.801 ± 0.004      | 0.803 ± 0.004                 | 0.0071             | 3.40E-05             | 7.33E-02             | No                         |
| cg25122233 | 0.526 ± 0.003           | 0.548 ± 0.006      | 0.541 ± 0.006                 | 0.0102             | 3.47E-04             | 2.51E-01             | No                         |
| cg03453449 | 0.749 ± 0.002           | 0.766 ± 0.004      | 0.765 ± 0.004                 | 0.0102             | 7.71E-07             | 3.64E-03             | No                         |
| cg25632883 | 0.381 ± 0.004           | 0.343 ± 0.008      | 0.348 ± 0.009                 | -0.02              | 6.52E-06             | 2.07E-02             | No                         |
| cg24698536 | 0.311 ± 0.003           | 0.288 ± 0.007      | 0.289 ± 0.008                 | -0.0147            | 1.67E-05             | 4.18E-02             | No                         |
| cg12492906 | 0.444 ± 0.003           | 0.421 ± 0.006      | 0.427 ± 0.006                 | -0.0115            | 3.18E-05             | 7.11E-02             | No                         |
| cg00029284 | 0.79 ± 0.001            | 0.786 ± 0.002      | 0.778 ± 0.003                 | -0.006             | 5.98E-07             | 2.94E-03             | Yes                        |
| cg26103179 | 0.177 ± 0.002           | 0.16 ± 0.004       | 0.169 ± 0.004                 | -0.0076            | 2.79E-04             | 2.22E-01             | No                         |
| cg12160087 | 0.489 ± 0.001           | 0.482 ± 0.003      | 0.477 ± 0.003                 | -0.0064            | 3.98E-06             | 1.38E-02             | Yes                        |

| Probe      | Non-active <sup>b</sup> | Light <sup>b</sup> | Moderate / Heavy <sup>b</sup> | Coeff <sup>c</sup> | P-value <sup>c</sup> | q-value <sup>c</sup> | Dose-response <sup>d</sup> |
|------------|-------------------------|--------------------|-------------------------------|--------------------|----------------------|----------------------|----------------------------|
| cg15893360 | 0.635 ± 0.002           | 0.621 ± 0.004      | 0.625 ± 0.004                 | -0.0065            | 4.74E-04             | 2.93E-01             | No                         |
| cg08698721 | 0.658 ± 0.002           | 0.666 ± 0.004      | 0.673 ± 0.004                 | 0.0084             | 2.20E-06             | 8.71E-03             | Yes                        |
| cg04291079 | 0.897 ± 0.002           | 0.909 ± 0.003      | 0.911 ± 0.004                 | 0.0077             | 5.62E-07             | 2.88E-03             | Yes                        |
| cg26554302 | 0.597 ± 0.003           | 0.614 ± 0.005      | 0.62 ± 0.005                  | 0.0083             | 1.13E-05             | 3.19E-02             | Yes                        |
| cg03796381 | 0.67 ± 0.001            | 0.682 ± 0.003      | 0.687 ± 0.003                 | 0.0096             | 5.82E-10             | 5.80E-06             | Yes                        |
| cg10078511 | 0.814 ± 0.002           | 0.83 ± 0.003       | 0.824 ± 0.003                 | 0.0068             | 5.71E-05             | 9.13E-02             | No                         |
| cg23849826 | 0.9 ± 0.001             | 0.912 ± 0.002      | 0.909 ± 0.002                 | 0.0047             | 8.13E-05             | 1.14E-01             | No                         |
| cg16231923 | 0.596 ± 0.003           | 0.616 ± 0.006      | 0.622 ± 0.006                 | 0.0121             | 1.23E-05             | 3.37E-02             | Yes                        |
| cg00213123 | 0.154 ± 0.001           | 0.166 ± 0.003      | 0.17 ± 0.003                  | 0.0074             | 3.42E-10             | 3.60E-06             | Yes                        |
| cg05549655 | 0.198 ± 0.002           | 0.228 ± 0.006      | 0.239 ± 0.005                 | 0.0191             | 3.52E-17             | 7.63E-13             | Yes                        |
| cg17852385 | 0.301 ± 0.003           | 0.321 ± 0.007      | 0.334 ± 0.006                 | 0.0143             | 6.75E-07             | 3.27E-03             | Yes                        |
| cg13570656 | 0.308 ± 0.003           | 0.344 ± 0.008      | 0.359 ± 0.008                 | 0.026              | 6.69E-13             | 8.81E-09             | Yes                        |
| cg12101586 | 0.398 ± 0.003           | 0.437 ± 0.007      | 0.445 ± 0.007                 | 0.0235             | 5.00E-14             | 8.37E-10             | Yes                        |
| cg22549041 | 0.345 ± 0.005           | 0.404 ± 0.01       | 0.418 ± 0.01                  | 0.0351             | 2.40E-16             | 4.66E-12             | Yes                        |
| cg11924019 | 0.474 ± 0.002           | 0.5 ± 0.005        | 0.513 ± 0.005                 | 0.0178             | 3.10E-18             | 7.13E-14             | Yes                        |
| cg18092474 | 0.562 ± 0.004           | 0.598 ± 0.008      | 0.624 ± 0.008                 | 0.0264             | 2.33E-13             | 3.58E-09             | Yes                        |
| cg26516004 | 0.94 ± 0.001            | 0.949 ± 0.002      | 0.95 ± 0.002                  | 0.0047             | 2.48E-06             | 9.53E-03             | Yes                        |
| cg01359532 | 0.854 ± 0.001           | 0.865 ± 0.003      | 0.872 ± 0.003                 | 0.0089             | 2.89E-09             | 2.73E-05             | Yes                        |
| cg04807108 | 0.724 ± 0.003           | 0.752 ± 0.006      | 0.749 ± 0.006                 | 0.0123             | 9.17E-05             | 1.22E-01             | No                         |
| cg12937151 | 0.509 ± 0.004           | 0.489 ± 0.007      | 0.477 ± 0.007                 | -0.0173            | 2.10E-06             | 8.42E-03             | Yes                        |
| cg04459939 | 0.485 ± 0.003           | 0.51 ± 0.006       | 0.519 ± 0.007                 | 0.0145             | 1.11E-07             | 7.42E-04             | Yes                        |
| cg23335299 | 0.453 ± 0.003           | 0.48 ± 0.006       | 0.487 ± 0.007                 | 0.0144             | 4.70E-07             | 2.47E-03             | Yes                        |
| cg13834112 | 0.653 ± 0.003           | 0.677 ± 0.005      | 0.688 ± 0.005                 | 0.014              | 2.60E-08             | 1.91E-04             | Yes                        |
| cg26804595 | 0.458 ± 0.002           | 0.443 ± 0.003      | 0.457 ± 0.003                 | -0.0044            | 1.88E-03             | 4.87E-01             | No                         |
| cg13928411 | 0.617 ± 0.001           | 0.626 ± 0.003      | 0.623 ± 0.003                 | 0.0049             | 8.59E-05             | 1.18E-01             | No                         |
| cg09743950 | 0.759 ± 0.002           | 0.744 ± 0.004      | 0.741 ± 0.004                 | -0.0091            | 6.90E-06             | 2.15E-02             | Yes                        |
| cg00253658 | 0.319 ± 0.004           | 0.375 ± 0.009      | 0.389 ± 0.009                 | 0.0343             | 5.58E-16             | 1.03E-11             | Yes                        |

| Probe      | Non-active <sup>b</sup> | Light <sup>b</sup> | Moderate / Heavy <sup>b</sup> | Coeff <sup>c</sup> | P-value <sup>c</sup> | q-value <sup>c</sup> | Dose-response <sup>d</sup> |
|------------|-------------------------|--------------------|-------------------------------|--------------------|----------------------|----------------------|----------------------------|
| cg26681628 | 0.777 ± 0.002           | 0.801 ± 0.003      | 0.799 ± 0.003                 | 0.0118             | 6.52E-10             | 6.32E-06             | No                         |
| cg03687532 | 0.904 ± 0.002           | 0.921 ± 0.003      | 0.915 ± 0.003                 | 0.0057             | 7.84E-04             | 3.54E-01             | No                         |
| cg03177666 | 0.763 ± 0.002           | 0.78 ± 0.004       | 0.785 ± 0.004                 | 0.0097             | 2.92E-06             | 1.08E-02             | Yes                        |
| cg08755703 | 0.612 ± 0.002           | 0.627 ± 0.005      | 0.641 ± 0.005                 | 0.0116             | 2.71E-06             | 1.03E-02             | Yes                        |
| cg24173182 | 0.335 ± 0.003           | 0.354 ± 0.006      | 0.364 ± 0.005                 | 0.0135             | 6.81E-06             | 2.15E-02             | Yes                        |
| cg05568941 | 0.764 ± 0.002           | 0.784 ± 0.005      | 0.782 ± 0.004                 | 0.0082             | 7.02E-06             | 2.17E-02             | No                         |
| cg06949812 | 0.486 ± 0.002           | 0.502 ± 0.005      | 0.5 ± 0.004                   | 0.0066             | 2.59E-04             | 2.16E-01             | No                         |
| cg11096905 | 0.671 ± 0.002           | 0.653 ± 0.004      | 0.659 ± 0.004                 | -0.0082            | 8.87E-05             | 1.20E-01             | No                         |
| cg23928512 | 0.569 ± 0.002           | 0.558 ± 0.004      | 0.554 ± 0.004                 | -0.0066            | 1.58E-05             | 4.04E-02             | Yes                        |
| cg23664708 | 0.253 ± 0.002           | 0.244 ± 0.005      | 0.236 ± 0.005                 | -0.0113            | 3.33E-07             | 1.91E-03             | Yes                        |
| cg06509837 | 0.341 ± 0.003           | 0.313 ± 0.007      | 0.319 ± 0.007                 | -0.0136            | 2.62E-04             | 2.17E-01             | No                         |
| cg26580869 | 0.752 ± 0.002           | 0.726 ± 0.006      | 0.738 ± 0.005                 | -0.0091            | 1.09E-03             | 4.00E-01             | No                         |
| cg02010738 | 0.43 ± 0.003            | 0.402 ± 0.006      | 0.419 ± 0.006                 | -0.0087            | 1.35E-03             | 4.39E-01             | No                         |
| cg08097581 | 0.604 ± 0.001           | 0.591 ± 0.003      | 0.593 ± 0.002                 | -0.0058            | 1.85E-06             | 7.58E-03             | No                         |
| cg26652413 | 0.108 ± 0.002           | 0.119 ± 0.003      | 0.123 ± 0.003                 | 0.0067             | 1.60E-06             | 6.63E-03             | Yes                        |
| cg23458168 | 0.253 ± 0.004           | 0.275 ± 0.008      | 0.297 ± 0.009                 | 0.0186             | 4.93E-06             | 1.65E-02             | Yes                        |
| cg16547579 | 0.726 ± 0.002           | 0.708 ± 0.004      | 0.718 ± 0.004                 | -0.0075            | 3.73E-04             | 2.59E-01             | No                         |
| cg20244340 | 0.353 ± 0.002           | 0.336 ± 0.004      | 0.339 ± 0.004                 | -0.0099            | 3.99E-07             | 2.23E-03             | No                         |
| cg11868728 | 0.848 ± 0.001           | 0.857 ± 0.003      | 0.855 ± 0.003                 | 0.0049             | 3.11E-05             | 7.03E-02             | No                         |
| cg20274009 | 0.781 ± 0.001           | 0.787 ± 0.003      | 0.784 ± 0.003                 | 0.0038             | 3.83E-05             | 7.59E-02             | No                         |
| cg07339236 | 0.081 ± 0.001           | 0.071 ± 0.002      | 0.066 ± 0.002                 | -0.008             | 6.00E-19             | 1.47E-14             | Yes                        |
| cg20643029 | 0.188 ± 0.001           | 0.178 ± 0.003      | 0.173 ± 0.003                 | -0.0074            | 3.07E-06             | 1.11E-02             | Yes                        |
| cg12426652 | 0.123 ± 0.001           | 0.117 ± 0.003      | 0.115 ± 0.002                 | -0.0051            | 5.50E-06             | 1.82E-02             | Yes                        |
| cg04478905 | 0.442 ± 0.002           | 0.43 ± 0.004       | 0.428 ± 0.003                 | -0.009             | 8.95E-07             | 4.02E-03             | Yes                        |
| cg26441486 | 0.415 ± 0.002           | 0.4 ± 0.005        | 0.392 ± 0.005                 | -0.0116            | 2.28E-06             | 8.92E-03             | Yes                        |

<sup>a</sup>FDR  $q < 0.05$  (Model1). <sup>b</sup> $\beta \pm SE$  for the ratio of methylated signal to total signal (methylated plus unmethylated). <sup>c</sup>3-level maternal smoking variable (non-active, light, moderate/heavy) treated as a continuous variable. <sup>d</sup>Notes whether or not the CpG site meets our criteria for showing a dose-response (see Methods section, Tobacco smoke exposure, for details).

**Table S7.** Percentage of CpGs showing a dose-response relationship.

| <b>P-value cutoff</b>   | <b>N CpG sites</b> | <b>% Dose-response</b> |
|-------------------------|--------------------|------------------------|
| $p < 1 \times 10^{-4}$  | 185 <sup>a</sup>   | 57.8%                  |
| $p < 1 \times 10^{-5}$  | 140                | 65.0%                  |
| $p < 1 \times 10^{-6}$  | 87                 | 75.9%                  |
| $p < 1 \times 10^{-7}$  | 63                 | 79.4%                  |
| $p < 1 \times 10^{-8}$  | 47                 | 87.2%                  |
| $p < 1 \times 10^{-9}$  | 39                 | 89.7%                  |
| $p < 1 \times 10^{-10}$ | 34                 | 91.2%                  |

<sup>a</sup>All sites had an FDR  $q < 0.05$ .



**Table S8.** Genome-wide significant CpG sites: replication using previously published studies.<sup>a</sup>

| Probe      | Chr | Basepair <sup>b</sup> | Nearest gene | Newborn <sup>c</sup> :<br>Site | Newborn <sup>c</sup> :<br>Gene | Adult <sup>c</sup> :<br>Site | Adult <sup>c</sup> :<br>Gene | Model1 <sup>d</sup><br>Coeff | Model1 <sup>d</sup><br>P-value | Model1 <sup>d</sup><br>q-value | $\Delta \beta$ -<br>value <sup>e</sup> |
|------------|-----|-----------------------|--------------|--------------------------------|--------------------------------|------------------------------|------------------------------|------------------------------|--------------------------------|--------------------------------|----------------------------------------|
| cg05575921 | 5   | 373378                | AHRR         | J                              | J                              | Z; S                         | Z; S; M                      | -0.046                       | 1.45E-69                       | 5.17E-64                       | -0.043                                 |
| cg04180046 | 7   | 45002736              | MYO1G        | J                              | J                              | Z                            | Z                            | 0.051                        | 1.53E-40                       | 2.73E-35                       | 0.052                                  |
| cg09935388 | 1   | 92947588              | GFI1         | J                              | J                              | Z; S                         | Z; S                         | -0.086                       | 2.39E-34                       | 2.85E-29                       | -0.084                                 |
| cg25949550 | 7   | 145814306             | CNTNAP2      | J                              | J                              | Z; S                         | Z; S                         | -0.020                       | 1.39E-31                       | 1.24E-26                       | -0.019                                 |
| cg12876356 | 1   | 92946825              | GFI1         | J                              | J                              | Z                            | Z; S                         | -0.069                       | 2.22E-31                       | 1.59E-26                       | -0.077                                 |
| cg12803068 | 7   | 45002919              | MYO1G        | J                              | J                              | Z                            | Z                            | 0.053                        | 3.58E-31                       | 2.13E-26                       | 0.053                                  |
| cg18146737 | 1   | 92946700              | GFI1         | J                              | J                              | Z                            | Z; S                         | -0.065                       | 3.83E-30                       | 1.96E-25                       | -0.075                                 |
| cg18316974 | 1   | 92947035              | GFI1         | J                              | J                              | Z                            | Z; S                         | -0.033                       | 3.47E-29                       | 1.55E-24                       | -0.044                                 |
| cg21161138 | 5   | 399360                | AHRR         | J                              | J                              | Z; S                         | Z; S; M                      | -0.019                       | 5.51E-26                       | 2.19E-21                       | -0.020                                 |
| cg19089201 | 7   | 45002287              | MYO1G        | J                              | J                              | Z                            | Z                            | 0.017                        | 1.62E-23                       | 5.79E-19                       | 0.020                                  |
| cg14179389 | 1   | 92947961              | GFI1         | J                              | J                              | NA                           | Z; S                         | -0.068                       | 3.38E-23                       | 1.10E-18                       | -0.065                                 |
| cg06338710 | 1   | 92946187              | GFI1         | J                              | J                              | NA                           | Z; S                         | -0.023                       | 1.96E-21                       | 5.83E-17                       | -0.031                                 |
| cg22937882 | 5   | 405774                | AHRR         | NA                             | J                              | NA                           | Z; S; M                      | 0.013                        | 2.76E-21                       | 7.58E-17                       | 0.013                                  |
| cg09662411 | 1   | 92946132              | GFI1         | J                              | J                              | Z                            | Z; S                         | -0.034                       | 1.06E-19                       | 2.69E-15                       | -0.043                                 |
| cg22132788 | 7   | 45002486              | MYO1G        | J                              | J                              | Z                            | Z                            | 0.015                        | 2.11E-19                       | 5.04E-15                       | 0.016                                  |
| cg07339236 | 20  | 50312490              | ATP9A        | J                              | J                              | Z                            | Z                            | -0.013                       | 2.21E-18                       | 4.94E-14                       | -0.013                                 |
| cg05549655 | 15  | 75019143              | CYP1A1       | J                              | J                              | NA                           | NA                           | 0.032                        | 7.92E-18                       | 1.66E-13                       | 0.036                                  |
| cg11924019 | 15  | 75019283              | CYP1A1       | J                              | J                              | NA                           | NA                           | 0.029                        | 9.40E-18                       | 1.87E-13                       | 0.033                                  |
| cg00253658 | 16  | 54210496              | FTO          | J                              | J                              | NA                           | NA                           | 0.059                        | 1.37E-17                       | 2.57E-13                       | 0.063                                  |
| cg22549041 | 15  | 75019251              | CYP1A1       | J                              | J                              | NA                           | NA                           | 0.059                        | 5.94E-17                       | 1.06E-12                       | 0.066                                  |
| cg08606254 | 5   | 323969                | AHRR         | NA                             | J                              | Z                            | Z; S; M                      | 0.020                        | 2.14E-15                       | 3.65E-11                       | 0.021                                  |
| cg25464840 | 10  | 14372910              | FRMD4A       | NA                             | J                              | NA                           | NA                           | 0.022                        | 3.15E-15                       | 5.11E-11                       | 0.023                                  |
| cg12101586 | 15  | 75019203              | CYP1A1       | J                              | J                              | NA                           | NA                           | 0.039                        | 5.38E-15                       | 8.36E-11                       | 0.043                                  |
| cg15507334 | 10  | 14372913              | FRMD4A       | NA                             | J                              | NA                           | NA                           | 0.020                        | 2.43E-13                       | 3.62E-09                       | 0.022                                  |
| cg26681628 | 16  | 54210550              | FTO          | NA                             | J                              | NA                           | NA                           | 0.023                        | 4.05E-13                       | 5.79E-09                       | 0.023                                  |
| cg18092474 | 15  | 75019302              | CYP1A1       | J                              | J                              | NA                           | NA                           | 0.042                        | 5.47E-13                       | 7.51E-09                       | 0.050                                  |
| cg23067299 | 5   | 323907                | AHRR         | J                              | J                              | NA                           | Z; S; M                      | 0.022                        | 8.94E-13                       | 1.18E-08                       | 0.022                                  |
| cg13570656 | 15  | 75019196              | CYP1A1       | J                              | J                              | NA                           | NA                           | 0.042                        | 9.63E-13                       | 1.23E-08                       | 0.044                                  |
| cg11429111 | 5   | 134813329             | TIFAB        | NA                             | NA                             | NA                           | NA                           | 0.031                        | 1.04E-12                       | 1.29E-08                       | 0.034                                  |
| cg01952185 | 5   | 134813213             | TIFAB        | NA                             | NA                             | NA                           | NA                           | 0.029                        | 2.55E-12                       | 3.04E-08                       | 0.031                                  |
| cg18703066 | 2   | 105363536             | LOC284998    | J                              | J                              | NA                           | NA                           | -0.006                       | 7.63E-12                       | 8.79E-08                       | -0.004                                 |

| Probe      | Chr | Basepair <sup>b</sup> | Nearest gene | Newborn <sup>c</sup> :<br>Site | Newborn <sup>c</sup> :<br>Gene | Adult <sup>c</sup> :<br>Site | Adult <sup>c</sup> :<br>Gene | Model1 <sup>d</sup><br>Coeff | Model1 <sup>d</sup><br>P-value | Model1 <sup>d</sup><br>q-value | $\Delta \beta$ -<br>value <sup>e</sup> |
|------------|-----|-----------------------|--------------|--------------------------------|--------------------------------|------------------------------|------------------------------|------------------------------|--------------------------------|--------------------------------|----------------------------------------|
| cg11902777 | 5   | 368843                | AHRR         | NA                             | J                              | Z                            | Z; S; M                      | -0.008                       | 1.13E-11                       | 1.26E-07                       | -0.009                                 |
| cg18132363 | 6   | 166260572             | SDIM1        | NA                             | NA                             | NA                           | NA                           | -0.027                       | 8.92E-11                       | 9.53E-07                       | -0.029                                 |
| cg15325070 | 1   | 2792704               | TTC34        | NA                             | NA                             | NA                           | NA                           | 0.018                        | 9.07E-11                       | 9.53E-07                       | 0.018                                  |
| cg10399789 | 1   | 92945668              | GFI1         | J                              | J                              | NA                           | Z; S                         | -0.016                       | 5.74E-10                       | 5.66E-06                       | -0.020                                 |
| cg14817490 | 5   | 392920                | AHRR         | NA                             | J                              | Z                            | Z; S; M                      | -0.023                       | 5.75E-10                       | 5.66E-06                       | -0.021                                 |
| cg01031101 | 6   | 28227091              | NKAPL        | NA                             | NA                             | NA                           | NA                           | 0.023                        | 5.86E-10                       | 5.66E-06                       | 0.026                                  |
| cg26764244 | 1   | 68299511              | GNG12        | J                              | J                              | NA                           | Z; S                         | -0.023                       | 6.68E-10                       | 6.28E-06                       | -0.023                                 |
| cg00213123 | 15  | 75019070              | CYP1A1       | NA                             | J                              | NA                           | NA                           | 0.012                        | 7.47E-10                       | 6.85E-06                       | 0.014                                  |
| cg03796381 | 15  | 36650033              | COX6CP4      | NA                             | NA                             | NA                           | NA                           | 0.015                        | 1.17E-09                       | 1.05E-05                       | 0.015                                  |
| cg10520740 | 12  | 1952798               | CACNA2D4     | NA                             | NA                             | NA                           | NA                           | -0.009                       | 1.86E-09                       | 1.62E-05                       | -0.010                                 |
| cg03144619 | 1   | 230415668             | GALNT2       | NA                             | J                              | NA                           | NA                           | -0.037                       | 2.17E-09                       | 1.85E-05                       | -0.038                                 |
| cg20344448 | 10  | 14372431              | FRMD4A       | NA                             | J                              | NA                           | NA                           | 0.015                        | 2.97E-09                       | 2.47E-05                       | 0.015                                  |
| cg01359532 | 15  | 75045126              | CYP1A2       | NA                             | NA                             | NA                           | NA                           | 0.014                        | 3.11E-09                       | 2.53E-05                       | 0.015                                  |
| cg10253847 | 6   | 28227085              | NKAPL        | NA                             | NA                             | NA                           | NA                           | 0.013                        | 6.51E-09                       | 5.17E-05                       | 0.015                                  |
| cg11813497 | 10  | 14372879              | FRMD4A       | J                              | J                              | NA                           | NA                           | 0.024                        | 6.85E-09                       | 5.32E-05                       | 0.029                                  |
| cg25189904 | 1   | 68299493              | GNG12        | J                              | J                              | Z; S                         | Z; S                         | -0.020                       | 9.06E-09                       | 6.89E-05                       | -0.018                                 |
| cg24250902 | 1   | 230415547             | GALNT2       | NA                             | J                              | NA                           | NA                           | -0.032                       | 1.13E-08                       | 8.43E-05                       | -0.031                                 |
| cg13822849 | 9   | 137999757             | OLFM1        | NA                             | NA                             | NA                           | NA                           | 0.015                        | 1.18E-08                       | 8.58E-05                       | 0.015                                  |
| cg23916896 | 5   | 368804                | AHRR         | J                              | J                              | Z                            | Z; S; M                      | -0.022                       | 1.24E-08                       | 8.87E-05                       | -0.022                                 |
| cg13834112 | 15  | 90361639              | ANPEP        | NA                             | NA                             | NA                           | Z                            | 0.023                        | 1.46E-08                       | 1.00E-04                       | 0.029                                  |
| cg26889659 | 6   | 684090                | EXOC2        | NA                             | NA                             | NA                           | NA                           | -0.055                       | 1.46E-08                       | 1.00E-04                       | -0.047                                 |
| cg12806681 | 5   | 368394                | AHRR         | NA                             | J                              | Z                            | Z; S; M                      | -0.009                       | 1.59E-08                       | 1.07E-04                       | -0.008                                 |
| cg05697274 | 1   | 230415377             | GALNT2       | NA                             | J                              | NA                           | NA                           | -0.026                       | 1.75E-08                       | 1.16E-04                       | -0.024                                 |
| cg18096987 | 3   | 11623873              | VGLL4        | J                              | J                              | NA                           | NA                           | -0.018                       | 4.10E-08                       | 2.67E-04                       | -0.013                                 |
| cg10312186 | 6   | 170403583             | LOC100505903 | NA                             | NA                             | NA                           | NA                           | -0.026                       | 4.40E-08                       | 2.81E-04                       | -0.025                                 |
| cg08097581 | 19  | 15528589              | AKAP8L       | NA                             | NA                             | NA                           | NA                           | -0.011                       | 5.15E-08                       | 3.21E-04                       | -0.012                                 |
| cg07104557 | 7   | 1036653               | C7orf50      | NA                             | NA                             | NA                           | NA                           | -0.014                       | 5.21E-08                       | 3.21E-04                       | -0.017                                 |
| cg15578140 | 7   | 147718109             | CNTNAP2      | NA                             | J                              | NA                           | Z; S                         | 0.014                        | 5.56E-08                       | 3.32E-04                       | 0.015                                  |
| cg23335299 | 15  | 90291756              | MESP1        | NA                             | NA                             | NA                           | NA                           | 0.025                        | 5.58E-08                       | 3.32E-04                       | 0.030                                  |
| cg20244340 | 20  | 19193989              | SLC24A3      | NA                             | NA                             | NA                           | Z                            | -0.017                       | 6.33E-08                       | 3.71E-04                       | -0.015                                 |
| cg04459939 | 15  | 90291141              | MESP1        | NA                             | NA                             | NA                           | NA                           | 0.024                        | 6.91E-08                       | 3.98E-04                       | 0.029                                  |
| cg18694169 | 6   | 28227079              | NKAPL        | NA                             | NA                             | NA                           | NA                           | 0.019                        | 9.62E-08                       | 5.46E-04                       | 0.020                                  |
| cg00589617 | 1   | 230415343             | GALNT2       | NA                             | J                              | NA                           | NA                           | -0.029                       | 1.07E-07                       | 5.89E-04                       | -0.029                                 |
| cg04598670 | 7   | 68697651              | LOC100507468 | J                              | J                              | NA                           | NA                           | -0.021                       | 1.07E-07                       | 5.89E-04                       | -0.016                                 |
| cg24591105 | 1   | 230415225             | GALNT2       | NA                             | J                              | NA                           | NA                           | -0.024                       | 1.26E-07                       | 6.83E-04                       | -0.026                                 |

| Probe      | Chr | Basepair <sup>b</sup> | Nearest gene | Newborn <sup>c</sup> :<br>Site | Newborn <sup>c</sup> :<br>Gene | Adult <sup>c</sup> :<br>Site | Adult <sup>c</sup> :<br>Gene | Model1 <sup>d</sup><br>Coeff | Model1 <sup>d</sup><br>P-value | Model1 <sup>d</sup><br>q-value | $\Delta \beta$ -<br>value <sup>e</sup> |
|------------|-----|-----------------------|--------------|--------------------------------|--------------------------------|------------------------------|------------------------------|------------------------------|--------------------------------|--------------------------------|----------------------------------------|
| cg04098479 | 4   | 1994849               | WHSC2        | NA                             | NA                             | NA                           | NA                           | 0.004                        | 1.29E-07                       | 6.89E-04                       | 0.003                                  |
| cg03453449 | 12  | 95945120              | USP44        | NA                             | NA                             | NA                           | NA                           | 0.018                        | 1.31E-07                       | 6.89E-04                       | 0.017                                  |
| cg09368188 | 1   | 245330018             | KIF26B       | NA                             | J                              | NA                           | NA                           | 0.026                        | 1.54E-07                       | 7.95E-04                       | 0.030                                  |
| cg04291079 | 14  | 101294430             | MEG3         | NA                             | J                              | NA                           | NA                           | 0.013                        | 1.67E-07                       | 8.53E-04                       | 0.013                                  |
| cg05568941 | 17  | 38517913              | GJD3         | NA                             | NA                             | NA                           | NA                           | 0.015                        | 1.78E-07                       | 8.94E-04                       | 0.019                                  |
| cg04478905 | 21  | 37915091              | CLDN14       | NA                             | NA                             | NA                           | NA                           | -0.016                       | 1.96E-07                       | 9.70E-04                       | -0.013                                 |
| cg15522425 | 1   | 2792637               | TTC34        | NA                             | NA                             | NA                           | NA                           | 0.014                        | 2.36E-07                       | 1.16E-03                       | 0.014                                  |
| cg18621256 | 10  | 119221444             | EMX2OS       | NA                             | NA                             | NA                           | NA                           | -0.014                       | 3.95E-07                       | 1.91E-03                       | -0.015                                 |
| cg26954197 | 5   | 436816                | AHRR         | NA                             | J                              | NA                           | Z; S; M                      | 0.007                        | 4.80E-07                       | 2.29E-03                       | 0.006                                  |
| cg03991871 | 5   | 368447                | AHRR         | J                              | J                              | Z                            | Z; S; M                      | -0.009                       | 5.01E-07                       | 2.36E-03                       | -0.008                                 |
| cg19631472 | 11  | 18415641              | LDHA         | NA                             | NA                             | NA                           | NA                           | -0.012                       | 5.28E-07                       | 2.45E-03                       | -0.011                                 |
| cg16459265 | 7   | 45025080              | C7orf40      | NA                             | NA                             | NA                           | Z                            | -0.010                       | 6.22E-07                       | 2.85E-03                       | -0.011                                 |
| cg26119806 | 2   | 18061572              | KCNS3        | NA                             | NA                             | NA                           | NA                           | -0.017                       | 6.56E-07                       | 2.97E-03                       | -0.017                                 |
| cg03177666 | 16  | 54365103              | IRX3         | NA                             | NA                             | NA                           | NA                           | 0.017                        | 7.08E-07                       | 3.16E-03                       | 0.019                                  |
| cg17852385 | 15  | 75019188              | CYP1A1       | NA                             | J                              | NA                           | NA                           | 0.023                        | 7.21E-07                       | 3.18E-03                       | 0.026                                  |
| cg25632883 | 12  | 109250438             | SSH1         | NA                             | NA                             | NA                           | NA                           | -0.036                       | 7.61E-07                       | 3.31E-03                       | -0.035                                 |
| cg20643029 | 21  | 37915044              | CLDN14       | NA                             | NA                             | NA                           | NA                           | -0.013                       | 7.70E-07                       | 3.31E-03                       | -0.013                                 |
| cg00794911 | 6   | 166260532             | SDIM1        | NA                             | NA                             | NA                           | NA                           | -0.010                       | 8.10E-07                       | 3.45E-03                       | -0.011                                 |
| cg02892925 | 8   | 60032926              | LOC100505501 | NA                             | NA                             | NA                           | NA                           | 0.020                        | 8.48E-07                       | 3.56E-03                       | 0.018                                  |
| cg09523275 | 6   | 28227093              | NKAPL        | NA                             | NA                             | NA                           | NA                           | 0.018                        | 8.79E-07                       | 3.65E-03                       | 0.022                                  |
| cg17924476 | 5   | 323794                | AHRR         | NA                             | J                              | Z                            | Z; S; M                      | 0.017                        | 9.38E-07                       | 3.85E-03                       | 0.020                                  |
| cg15836046 | 1   | 2767242               | TTC34        | NA                             | NA                             | NA                           | NA                           | 0.006                        | 1.03E-06                       | 4.19E-03                       | 0.005                                  |
| cg12426652 | 21  | 37915056              | CLDN14       | NA                             | NA                             | NA                           | NA                           | -0.009                       | 1.18E-06                       | 4.73E-03                       | -0.007                                 |
| cg26516004 | 15  | 75019376              | CYP1A1       | NA                             | J                              | NA                           | NA                           | 0.008                        | 1.20E-06                       | 4.77E-03                       | 0.009                                  |
| cg08626436 | 10  | 88555339              | BMPR1A       | NA                             | NA                             | NA                           | NA                           | 0.032                        | 1.57E-06                       | 6.15E-03                       | 0.038                                  |
| cg18753646 | 4   | 187219538             | LOC285441    | NA                             | NA                             | NA                           | NA                           | -0.022                       | 1.60E-06                       | 6.22E-03                       | -0.019                                 |
| cg07211044 | 8   | 60032983              | LOC100505501 | NA                             | NA                             | NA                           | NA                           | 0.023                        | 1.65E-06                       | 6.32E-03                       | 0.025                                  |
| cg23664708 | 17  | 80196903              | SLC16A3      | NA                             | NA                             | NA                           | NA                           | -0.017                       | 1.70E-06                       | 6.35E-03                       | -0.013                                 |
| cg09743950 | 16  | 31341875              | ITGAM        | NA                             | NA                             | NA                           | NA                           | -0.016                       | 1.71E-06                       | 6.35E-03                       | -0.016                                 |
| cg18675097 | 6   | 28227127              | NKAPL        | NA                             | NA                             | NA                           | NA                           | 0.028                        | 1.71E-06                       | 6.35E-03                       | 0.032                                  |
| cg26652413 | 19  | 17007057              | CPAMD8       | NA                             | NA                             | NA                           | Z                            | 0.011                        | 1.94E-06                       | 7.16E-03                       | 0.013                                  |
| cg18722086 | 3   | 113380072             | KIAA2018     | NA                             | NA                             | NA                           | NA                           | 0.006                        | 2.40E-06                       | 8.68E-03                       | 0.005                                  |
| cg01825213 | 9   | 98979965              | HSD17B3      | NA                             | NA                             | NA                           | NA                           | 0.020                        | 2.41E-06                       | 8.68E-03                       | 0.019                                  |
| cg25383593 | 5   | 134827820             | TIFAB        | NA                             | NA                             | NA                           | NA                           | 0.012                        | 2.56E-06                       | 9.09E-03                       | 0.013                                  |
| cg20816361 | 1   | 2467100               | HES5         | NA                             | NA                             | NA                           | NA                           | 0.016                        | 2.60E-06                       | 9.09E-03                       | 0.015                                  |

| Probe      | Chr | Basepair <sup>b</sup> | Nearest gene        | Newborn <sup>c</sup> :<br>Site | Newborn <sup>c</sup> :<br>Gene | Adult <sup>c</sup> :<br>Site | Adult <sup>c</sup> :<br>Gene | Model1 <sup>d</sup><br>Coeff | Model1 <sup>d</sup><br>P-value | Model1 <sup>d</sup><br>q-value | $\Delta \beta$ -<br>value <sup>e</sup> |
|------------|-----|-----------------------|---------------------|--------------------------------|--------------------------------|------------------------------|------------------------------|------------------------------|--------------------------------|--------------------------------|----------------------------------------|
| cg10078511 | 15  | 39872032              | <i>THBS1</i>        | NA                             | NA                             | NA                           | NA                           | 0.013                        | 2.61E-06                       | 9.09E-03                       | 0.013                                  |
| cg06813382 | 10  | 81967195              | <i>LOC439990</i>    | NA                             | NA                             | NA                           | NA                           | 0.018                        | 2.62E-06                       | 9.09E-03                       | 0.019                                  |
| cg06415891 | 1   | 2467096               | <i>HES5</i>         | NA                             | NA                             | NA                           | NA                           | 0.019                        | 2.74E-06                       | 9.41E-03                       | 0.018                                  |
| cg17442776 | 1   | 147718540             | <i>TRNAQ8</i>       | NA                             | NA                             | NA                           | NA                           | 0.009                        | 3.14E-06                       | 1.06E-02                       | 0.008                                  |
| cg23849826 | 15  | 39872186              | <i>THBS1</i>        | NA                             | NA                             | NA                           | NA                           | 0.009                        | 3.16E-06                       | 1.06E-02                       | 0.010                                  |
| cg08026735 | 2   | 98703888              | <i>VWA3B</i>        | NA                             | NA                             | NA                           | NA                           | 0.012                        | 3.16E-06                       | 1.06E-02                       | 0.012                                  |
| cg11625488 | 6   | 170403557             | <i>LOC100505903</i> | NA                             | NA                             | NA                           | NA                           | -0.022                       | 3.70E-06                       | 1.22E-02                       | -0.019                                 |
| cg10841124 | 5   | 433274                | <i>AHRR</i>         | NA                             | J                              | NA                           | Z; S; M                      | 0.004                        | 3.79E-06                       | 1.24E-02                       | 0.005                                  |
| cg12937151 | 15  | 87758226              | <i>AGBL1</i>        | NA                             | NA                             | NA                           | NA                           | -0.028                       | 3.89E-06                       | 1.26E-02                       | -0.026                                 |
| cg16547579 | 20  | 4954333               | <i>SLC23A2</i>      | NA                             | NA                             | NA                           | NA                           | -0.016                       | 3.94E-06                       | 1.27E-02                       | -0.012                                 |
| cg11096905 | 17  | 63535567              | <i>AXIN2</i>        | NA                             | NA                             | NA                           | NA                           | -0.016                       | 4.15E-06                       | 1.32E-02                       | -0.015                                 |
| cg24698536 | 12  | 109250515             | <i>SSH1</i>         | NA                             | NA                             | NA                           | NA                           | -0.026                       | 4.22E-06                       | 1.34E-02                       | -0.022                                 |
| cg24239148 | 10  | 63422841              | <i>C10orf107</i>    | NA                             | NA                             | NA                           | NA                           | 0.007                        | 4.69E-06                       | 1.47E-02                       | 0.007                                  |
| cg10673740 | 10  | 121411826             | <i>BAG3</i>         | NA                             | NA                             | NA                           | NA                           | 0.019                        | 5.08E-06                       | 1.58E-02                       | 0.021                                  |
| cg22057874 | 2   | 179184866             | <i>OSBPL6</i>       | NA                             | NA                             | NA                           | NA                           | 0.013                        | 5.25E-06                       | 1.62E-02                       | 0.013                                  |
| cg04640109 | 8   | 106330173             | <i>ZFPM2</i>        | NA                             | NA                             | NA                           | NA                           | 0.011                        | 5.43E-06                       | 1.66E-02                       | 0.013                                  |
| cg12492906 | 12  | 109250545             | <i>SSH1</i>         | NA                             | NA                             | NA                           | NA                           | -0.020                       | 5.87E-06                       | 1.78E-02                       | -0.020                                 |
| cg11641006 | 2   | 235213874             | <i>RPS20P12</i>     | NA                             | NA                             | NA                           | NA                           | 0.016                        | 5.92E-06                       | 1.78E-02                       | 0.014                                  |
| cg11868728 | 20  | 22568116              | <i>FOXA2</i>        | NA                             | NA                             | NA                           | NA                           | 0.009                        | 6.03E-06                       | 1.80E-02                       | 0.007                                  |
| cg16517298 | 1   | 230413174             | <i>GALNT2</i>       | NA                             | J                              | NA                           | NA                           | -0.027                       | 6.09E-06                       | 1.80E-02                       | -0.027                                 |
| cg05593775 | 10  | 102778743             | <i>PDZD7</i>        | NA                             | NA                             | NA                           | NA                           | 0.016                        | 6.18E-06                       | 1.81E-02                       | 0.022                                  |
| cg03354508 | 6   | 147769498             | <i>YAP1P1</i>       | NA                             | NA                             | NA                           | NA                           | 0.011                        | 6.85E-06                       | 1.98E-02                       | 0.010                                  |
| cg24173182 | 17  | 1961286               | <i>HIC1</i>         | NA                             | NA                             | NA                           | Z                            | 0.022                        | 6.86E-06                       | 1.98E-02                       | 0.024                                  |
| cg13784312 | 9   | 134609065             | <i>RAPGEF1</i>      | NA                             | NA                             | NA                           | M                            | -0.016                       | 7.22E-06                       | 2.06E-02                       | -0.020                                 |
| cg26554302 | 15  | 22467326              | <i>IGHV1OR15-3</i>  | NA                             | NA                             | NA                           | NA                           | 0.014                        | 7.27E-06                       | 2.06E-02                       | 0.020                                  |
| cg22043296 | 11  | 1892139               | <i>LSP1</i>         | NA                             | NA                             | NA                           | NA                           | -0.012                       | 7.42E-06                       | 2.09E-02                       | -0.016                                 |
| cg04800195 | 5   | 180287904             | <i>ZFP62</i>        | NA                             | NA                             | NA                           | NA                           | 0.003                        | 7.56E-06                       | 2.11E-02                       | 0.003                                  |
| cg07249149 | 7   | 1035363               | <i>C7orf50</i>      | NA                             | NA                             | NA                           | NA                           | -0.013                       | 7.62E-06                       | 2.11E-02                       | -0.015                                 |
| cg15963463 | 1   | 25253237              | <i>RUNX3</i>        | NA                             | NA                             | NA                           | NA                           | -0.011                       | 7.69E-06                       | 2.11E-02                       | -0.008                                 |
| cg14086013 | 6   | 41604740              | <i>MDF1</i>         | NA                             | NA                             | NA                           | NA                           | 0.012                        | 7.74E-06                       | 2.11E-02                       | 0.015                                  |
| cg02010738 | 19  | 2095466               | <i>MOB3A</i>        | NA                             | NA                             | NA                           | Z                            | -0.020                       | 8.13E-06                       | 2.20E-02                       | -0.019                                 |
| cg18794473 | 8   | 77617694              | <i>ZFHX4</i>        | NA                             | NA                             | NA                           | NA                           | 0.004                        | 8.61E-06                       | 2.30E-02                       | 0.003                                  |
| cg26804595 | 16  | 749581                | <i>FBXL16</i>       | NA                             | NA                             | NA                           | NA                           | -0.010                       | 8.61E-06                       | 2.30E-02                       | -0.008                                 |
| cg14027333 | 6   | 32116317              | <i>PRRT1</i>        | NA                             | NA                             | NA                           | NA                           | -0.005                       | 8.76E-06                       | 2.32E-02                       | -0.004                                 |
| cg02356218 | 11  | 124352048             | <i>OR8B9P</i>       | NA                             | NA                             | NA                           | NA                           | -0.014                       | 9.03E-06                       | 2.37E-02                       | -0.013                                 |

| Probe      | Chr | Basepair <sup>b</sup> | Nearest gene | Newborn <sup>c</sup> :<br>Site | Newborn <sup>c</sup> :<br>Gene | Adult <sup>c</sup> :<br>Site | Adult <sup>c</sup> :<br>Gene | Model1 <sup>d</sup><br>Coeff | Model1 <sup>d</sup><br>P-value | Model1 <sup>d</sup><br>q-value | $\Delta \beta$ -<br>value <sup>e</sup> |
|------------|-----|-----------------------|--------------|--------------------------------|--------------------------------|------------------------------|------------------------------|------------------------------|--------------------------------|--------------------------------|----------------------------------------|
| cg14349977 | 4   | 187219430             | LOC285441    | NA                             | NA                             | NA                           | NA                           | -0.022                       | 9.09E-06                       | 2.37E-02                       | -0.021                                 |
| cg09063262 | 11  | 85358506              | TMEM126A     | NA                             | NA                             | NA                           | NA                           | -0.022                       | 9.37E-06                       | 2.41E-02                       | -0.021                                 |
| cg26441486 | 22  | 50317300              | CRELD2       | NA                             | NA                             | NA                           | NA                           | -0.018                       | 9.38E-06                       | 2.41E-02                       | -0.019                                 |
| cg00029284 | 12  | 111731203             | CUX2         | J                              | J                              | NA                           | NA                           | -0.009                       | 9.62E-06                       | 2.46E-02                       | -0.009                                 |
| cg12160087 | 12  | 120531986             | CCDC64       | NA                             | NA                             | NA                           | NA                           | -0.010                       | 1.14E-05                       | 2.88E-02                       | -0.010                                 |
| cg19727396 | 1   | 230415185             | GALNT2       | NA                             | J                              | NA                           | NA                           | -0.018                       | 1.15E-05                       | 2.88E-02                       | -0.020                                 |
| cg06949812 | 17  | 38517993              | GJD3         | NA                             | NA                             | NA                           | NA                           | 0.013                        | 1.20E-05                       | 3.00E-02                       | 0.015                                  |
| cg26103179 | 12  | 119591664             | SRRM4        | NA                             | NA                             | NA                           | NA                           | -0.015                       | 1.32E-05                       | 3.27E-02                       | -0.012                                 |
| cg09488203 | 10  | 95327884              | O3FAR1       | NA                             | NA                             | NA                           | NA                           | 0.009                        | 1.33E-05                       | 3.27E-02                       | 0.009                                  |
| cg13928411 | 16  | 22103791              | VWA3A        | NA                             | NA                             | NA                           | NA                           | 0.009                        | 1.35E-05                       | 3.29E-02                       | 0.008                                  |
| cg16231923 | 15  | 73923634              | NPTN         | NA                             | NA                             | NA                           | NA                           | 0.020                        | 1.36E-05                       | 3.30E-02                       | 0.023                                  |
| cg20274009 | 20  | 32450846              | TPM3P2       | NA                             | NA                             | NA                           | NA                           | 0.007                        | 1.37E-05                       | 3.32E-02                       | 0.004                                  |
| cg22877366 | 1   | 12107668              | MIIP         | NA                             | NA                             | NA                           | NA                           | -0.020                       | 1.40E-05                       | 3.35E-02                       | -0.019                                 |
| cg16449012 | 4   | 17781880              | FAM184B      | NA                             | NA                             | NA                           | NA                           | 0.011                        | 1.42E-05                       | 3.39E-02                       | 0.011                                  |
| cg00433296 | 8   | 22223852              | SLC39A14     | NA                             | NA                             | NA                           | NA                           | 0.010                        | 1.43E-05                       | 3.39E-02                       | 0.010                                  |
| cg05656688 | 1   | 25254088              | RUNX3        | NA                             | NA                             | NA                           | NA                           | -0.014                       | 1.44E-05                       | 3.40E-02                       | -0.015                                 |
| cg08142858 | 1   | 2718742               | TTC34        | NA                             | NA                             | NA                           | NA                           | 0.008                        | 1.49E-05                       | 3.49E-02                       | 0.005                                  |
| cg25415695 | 5   | 134828036             | TIFAB        | NA                             | NA                             | NA                           | NA                           | 0.012                        | 1.61E-05                       | 3.70E-02                       | 0.012                                  |
| cg25122233 | 12  | 54412506              | HOXC4        | NA                             | NA                             | NA                           | NA                           | 0.020                        | 1.61E-05                       | 3.70E-02                       | 0.018                                  |
| cg18828927 | 6   | 29275263              | OR14J1       | NA                             | NA                             | NA                           | NA                           | 0.008                        | 1.62E-05                       | 3.70E-02                       | 0.006                                  |
| cg08698721 | 14  | 101294147             | MEG3         | J                              | J                              | NA                           | NA                           | 0.013                        | 1.66E-05                       | 3.74E-02                       | 0.012                                  |
| cg22879098 | 5   | 672845                | TPPP         | NA                             | NA                             | NA                           | NA                           | -0.030                       | 1.67E-05                       | 3.74E-02                       | -0.025                                 |
| cg07448928 | 5   | 427755                | AHRR         | NA                             | J                              | NA                           | Z; S; M                      | 0.007                        | 1.67E-05                       | 3.74E-02                       | 0.006                                  |
| cg12443001 | 1   | 2467281               | HES5         | NA                             | NA                             | NA                           | NA                           | 0.010                        | 1.67E-05                       | 3.74E-02                       | 0.008                                  |
| cg23458168 | 19  | 30864867              | ZNF536       | NA                             | NA                             | NA                           | NA                           | 0.029                        | 1.76E-05                       | 3.90E-02                       | 0.033                                  |
| cg13547053 | 2   | 179184864             | OSBPL6       | NA                             | NA                             | NA                           | NA                           | 0.010                        | 1.83E-05                       | 3.99E-02                       | 0.011                                  |
| cg17345450 | 6   | 166259938             | SDIM1        | NA                             | NA                             | NA                           | NA                           | -0.011                       | 1.83E-05                       | 3.99E-02                       | -0.014                                 |
| cg23928512 | 17  | 79970192              | ASPSCR1      | NA                             | NA                             | NA                           | NA                           | -0.011                       | 1.83E-05                       | 3.99E-02                       | -0.013                                 |
| cg07553761 | 3   | 160167977             | TRIM59       | NA                             | NA                             | NA                           | NA                           | 0.004                        | 1.94E-05                       | 4.19E-02                       | 0.005                                  |
| cg13459104 | 9   | 98849721              | LOC158435    | NA                             | NA                             | NA                           | NA                           | 0.003                        | 1.95E-05                       | 4.19E-02                       | 0.003                                  |
| cg15893360 | 12  | 120700361             | PXN          | NA                             | NA                             | NA                           | NA                           | -0.013                       | 1.96E-05                       | 4.19E-02                       | -0.012                                 |
| cg02404974 | 6   | 41376295              | LOC100505711 | NA                             | NA                             | NA                           | NA                           | 0.015                        | 1.99E-05                       | 4.23E-02                       | 0.015                                  |
| cg04807108 | 15  | 78697933              | RWDD1P1      | NA                             | NA                             | NA                           | NA                           | 0.022                        | 2.01E-05                       | 4.24E-02                       | 0.026                                  |
| cg22171758 | 12  | 54146133              | CALCOCO1     | NA                             | NA                             | NA                           | NA                           | 0.012                        | 2.02E-05                       | 4.24E-02                       | 0.010                                  |
| cg03486379 | 10  | 34391256              | PARD3        | NA                             | NA                             | NA                           | NA                           | 0.009                        | 2.03E-05                       | 4.24E-02                       | 0.008                                  |

| Probe      | Chr | Basepair <sup>b</sup> | Nearest gene        | Newborn <sup>c</sup> :<br>Site | Newborn <sup>c</sup> :<br>Gene | Adult <sup>c</sup> :<br>Site | Adult <sup>c</sup> :<br>Gene | Model1 <sup>d</sup><br>Coeff | Model1 <sup>d</sup><br>P-value | Model1 <sup>d</sup><br>q-value | Δ β-value <sup>e</sup> |
|------------|-----|-----------------------|---------------------|--------------------------------|--------------------------------|------------------------------|------------------------------|------------------------------|--------------------------------|--------------------------------|------------------------|
| cg07464358 | 7   | 100952364             | <i>RABL5</i>        | NA                             | NA                             | NA                           | NA                           | 0.008                        | 2.08E-05                       | 4.30E-02                       | 0.011                  |
| cg19675142 | 1   | 116107015             | <i>LOC100132332</i> | NA                             | NA                             | NA                           | NA                           | 0.013                        | 2.08E-05                       | 4.30E-02                       | 0.013                  |
| cg08755703 | 16  | 54394989              | <i>IRX3</i>         | NA                             | NA                             | NA                           | NA                           | 0.017                        | 2.12E-05                       | 4.36E-02                       | 0.022                  |
| cg20174893 | 7   | 97600926              | <i>MGC72080</i>     | NA                             | NA                             | NA                           | NA                           | -0.010                       | 2.16E-05                       | 4.41E-02                       | -0.009                 |
| cg10788371 | 11  | 76381040              | <i>LRRC32</i>       | NA                             | NA                             | NA                           | NA                           | -0.010                       | 2.20E-05                       | 4.47E-02                       | -0.009                 |
| cg06509837 | 19  | 610955                | <i>HCN2</i>         | NA                             | NA                             | NA                           | NA                           | -0.026                       | 2.22E-05                       | 4.47E-02                       | -0.025                 |
| cg18209323 | 7   | 92672878              | <i>SAMD9</i>        | NA                             | NA                             | NA                           | NA                           | 0.016                        | 2.23E-05                       | 4.47E-02                       | 0.016                  |
| cg11064524 | 8   | 118875129             | <i>EXT1</i>         | NA                             | J                              | NA                           | NA                           | -0.011                       | 2.33E-05                       | 4.65E-02                       | -0.013                 |
| cg03687532 | 16  | 54228358              | <i>FTO</i>          | NA                             | J                              | NA                           | NA                           | 0.012                        | 2.41E-05                       | 4.77E-02                       | 0.015                  |
| cg26580869 | 19  | 611506                | <i>HCN2</i>         | NA                             | NA                             | NA                           | NA                           | -0.019                       | 2.41E-05                       | 4.77E-02                       | -0.020                 |
| cg13455434 | 8   | 30243930              | <i>RBPMS</i>        | NA                             | NA                             | NA                           | NA                           | 0.026                        | 2.44E-05                       | 4.77E-02                       | 0.027                  |
| cg16944958 | 6   | 170403962             | <i>LOC100505903</i> | NA                             | NA                             | NA                           | NA                           | -0.012                       | 2.44E-05                       | 4.77E-02                       | -0.010                 |
| cg26827653 | 11  | 125366540             | <i>MGC39545</i>     | NA                             | NA                             | NA                           | NA                           | 0.012                        | 2.50E-05                       | 4.85E-02                       | 0.012                  |
| cg19563365 | 11  | 86508399              | <i>PRSS23</i>       | NA                             | NA                             | NA                           | Z                            | 0.007                        | 2.56E-05                       | 4.94E-02                       | 0.007                  |

Abbreviations: Chr: chromosome, coeff: coefficient, NA: not applicable

<sup>a</sup>FDR  $q < 0.05$  (Model1). <sup>b</sup>Physical location in basepairs (Human genome build GRCh37/hg19). <sup>c</sup>Replication at the site and/or gene level using previously published studies that utilized Illumina HumanMethylation450 BeadChips. Study abbreviations: J: Joubert, BR et al. 2012, M: Monick, MM et al. 2012, S: Shenker, NS et al. 2013, and Z: Zeilinger, S et al. 2013. <sup>d</sup>Model1: Methylation  $\beta$ -value = maternal smoking + infant's sex + infant's cleft status + batch effect + bisulfite conversion efficiency. <sup>e</sup> $\beta$ -value represents the ratio of methylated signal to total signal (methylated plus unmethylated). This shows the difference between the mean  $\beta$ -value of smokers and non-smokers.

\*Meets bonferroni correction ( $p < 1.4 \times 10^{-7}$ ).

**Table S9.** Technical replicate assessment.<sup>a</sup>

| <b>Data processing</b>                   | <b>Mean Pearson correlation (uncentered)</b> | <b>Mean Pearson correlation (mean centered)<sup>b</sup></b> | <b>Mean of squared difference</b> |
|------------------------------------------|----------------------------------------------|-------------------------------------------------------------|-----------------------------------|
| <b>Replicates</b>                        |                                              |                                                             |                                   |
| Raw data                                 | 0.993                                        | 0.573                                                       | 0.0021                            |
| Normalized data <sup>c</sup>             | 0.996                                        | 0.692                                                       | 0.0014                            |
| Normalized plus adjustments <sup>d</sup> | 0.998                                        | 0.692                                                       | 0.0007                            |
| <b>Non-replicates<sup>e</sup></b>        |                                              |                                                             |                                   |
| Raw data                                 | 0.983                                        | -0.041                                                      | 0.0024                            |
| Normalized data <sup>c</sup>             | 0.986                                        | -0.043                                                      | 0.0023                            |
| Normalized plus adjustments <sup>d</sup> | 0.993                                        | -0.044                                                      | 0.0017                            |

<sup>a</sup>20 duplicate pairs ( $N_{\text{total}} = 40$ ). <sup>b</sup>For each CpG probe, the mean  $\beta$ -value was calculated across the 40 technical replicates and then subtracted from each  $\beta$ -value. The Pearson correlation was then calculated for each of the 20 duplicate pairs; the mean Pearson correlation across all pairs is reported in the table. <sup>c</sup>Corrected for dye bias, background corrected, and quantile normalized. <sup>d</sup>Also adjusted for batch effects (96-well plate) and bisulfite conversion efficiency. <sup>e</sup>Non-replicate pairs were created from the 40 technical replicates. All pairwise combinations were considered, except for those that were duplicates.

Supplemental figures

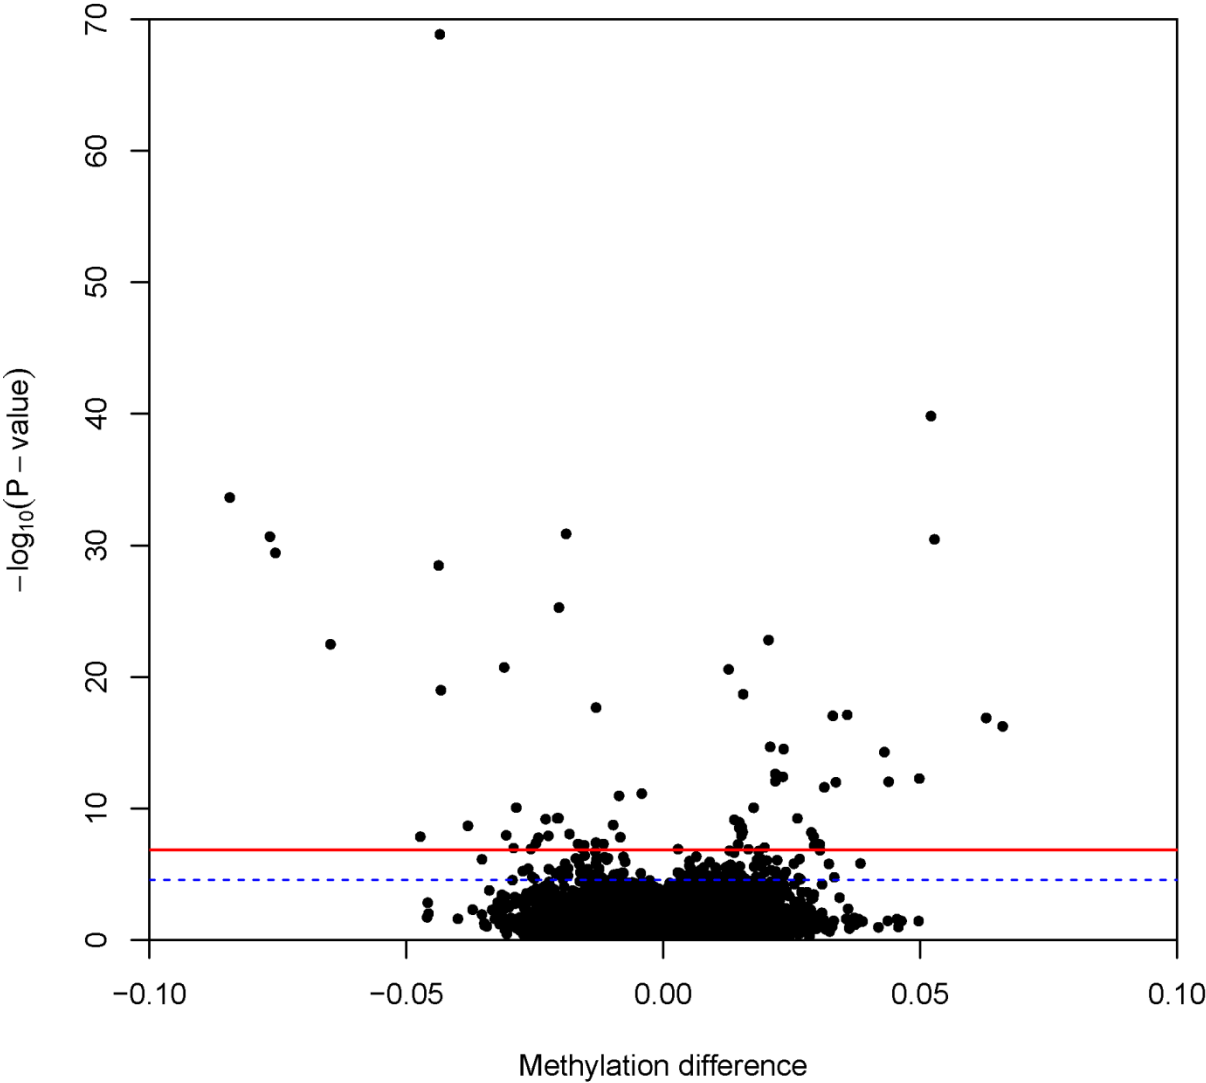

**Figure S1.** Volcano plot showing the methylation difference between infants of smokers and infants of non-smokers ( $\text{Mean } \beta_{\text{cases}} - \text{Mean } \beta_{\text{controls}}$ ) against the  $-\log_{10}(\text{P-value})$  based on results from Model1. The blue dashed horizontal line marks genome-wide significance using FDR  $q < 0.05$  as a cutoff ( $p < 2.69 \times 10^{-5}$ ), while the red solid horizontal line marks genome-wide significance using a bonferroni correction ( $p < 1.40 \times 10^{-7}$ ).



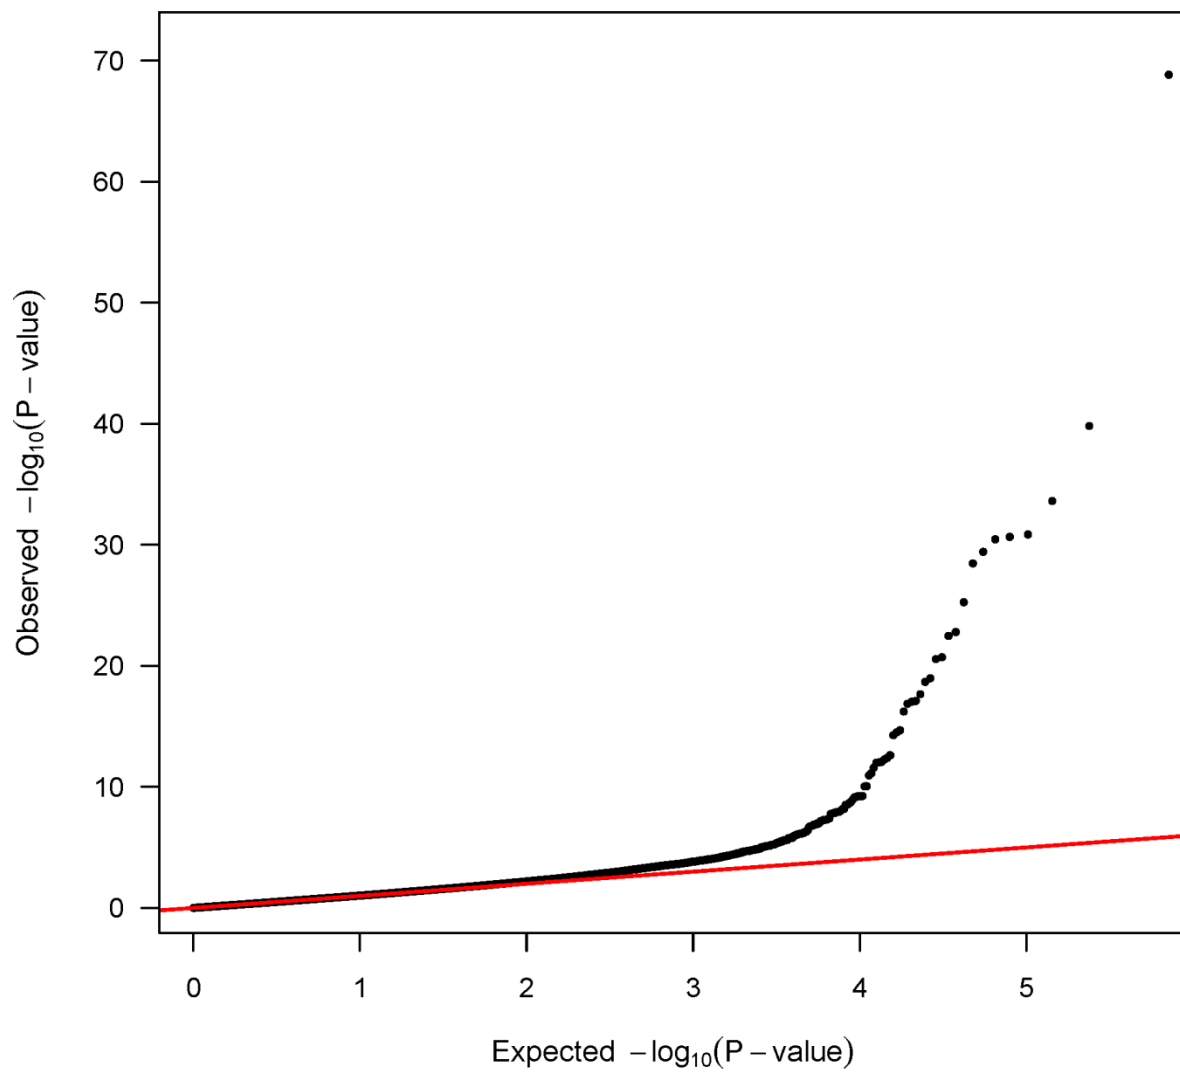

**Figure S2.** Quantile-quantile (Q-Q) plot showing the observed (Model1) versus expected  $-\log_{10}(\text{P-values})$  under the null hypothesis of no association.

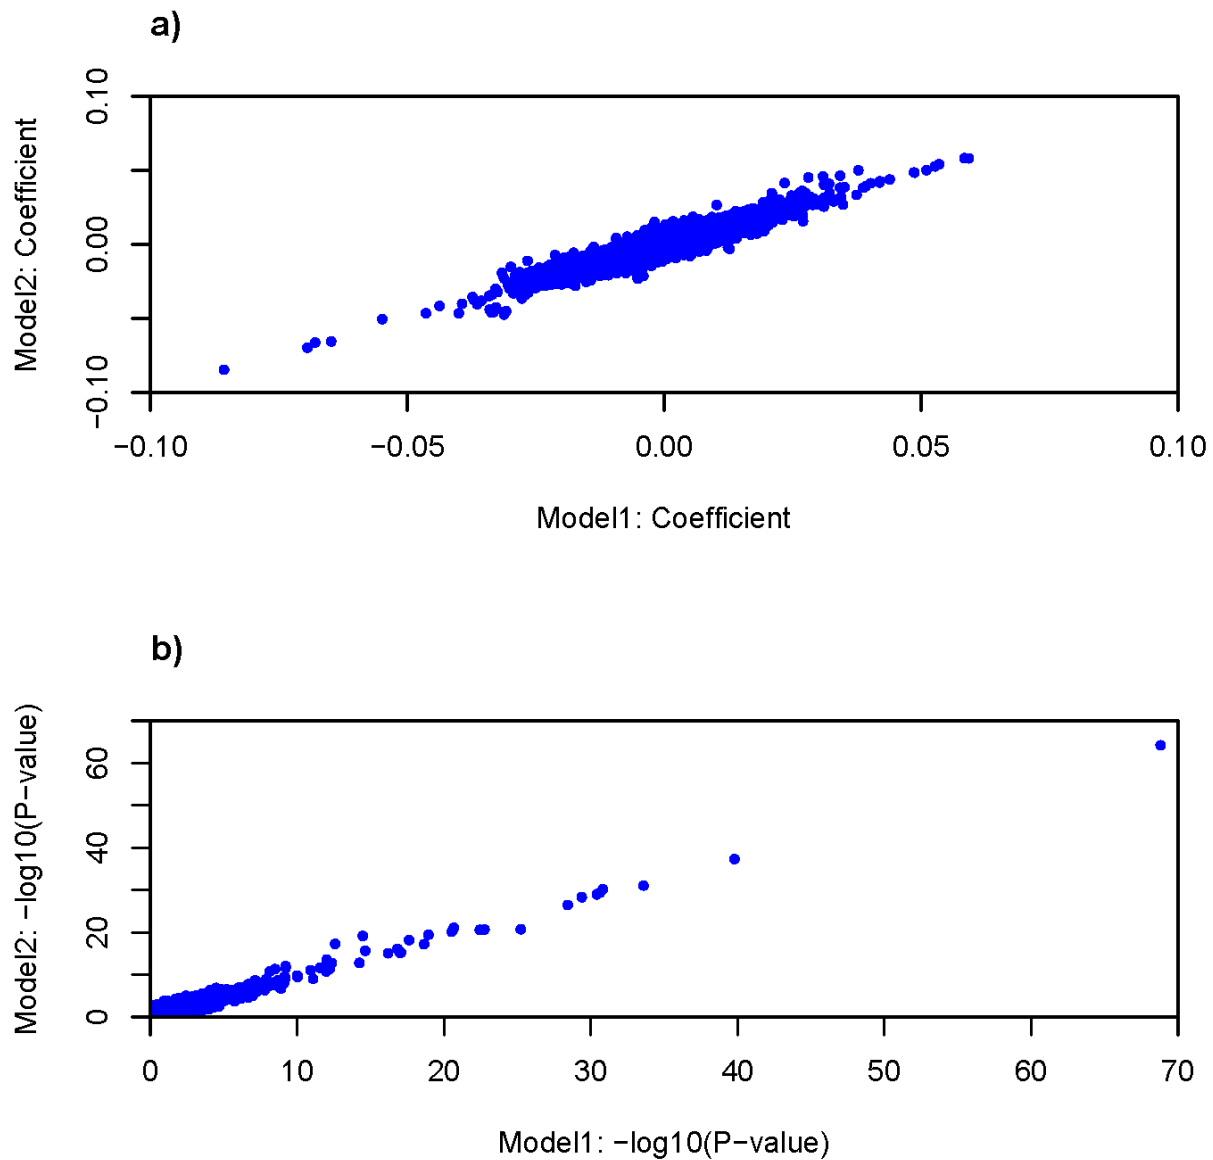

**Figure S3.** Comparison of results from Model1 and Model2. Model 1: Methylation  $\beta$ -value = maternal smoking + infant's sex + infant's cleft status + batch effect + bisulfite conversion efficiency; Model2: Methylation  $\beta$ -value = maternal smoking + infant's sex + infant's cleft status + batch effect + bisulfite conversion efficiency + maternal alcohol use + maternal education + maternal age at delivery + maternal folic acid supplement use + infant's birth weight + adjustment for 5 different cell type proportions. A) Comparison of the smoking coefficient in Model1 versus Model2 (Pearson correlation=0.93), B) Comparison of the smoking  $-\log_{10}(\text{P-value})$  in Model1 versus Model2 (Pearson correlation= 0.88).

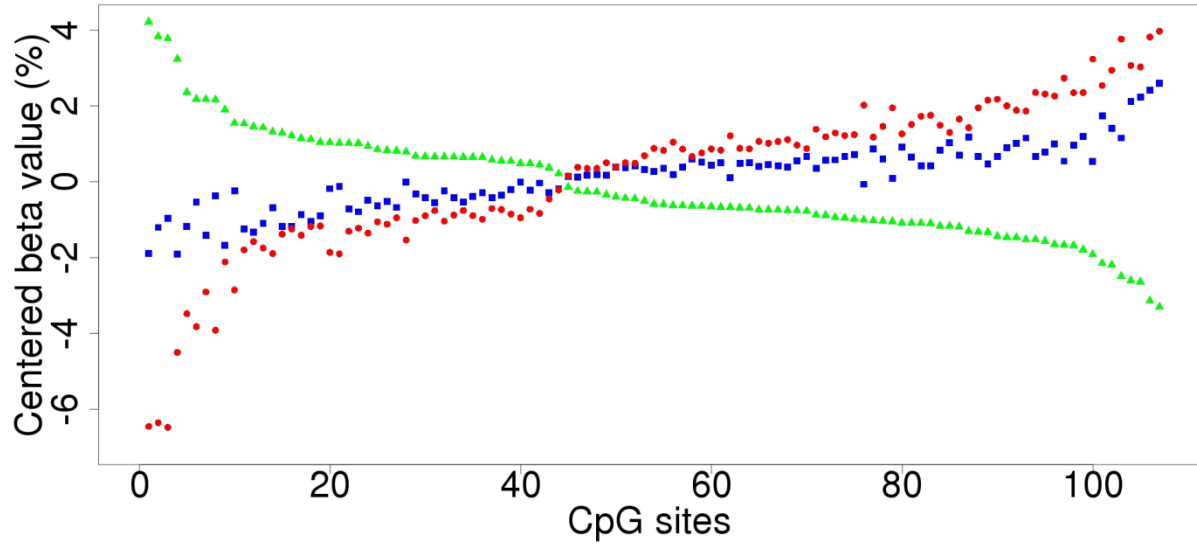

**Figure S4.** Genome-wide significant CpG sites that showed a dose-response relationship (N=107/185). Three exposure classes are shown: 1) Non-active smokers (green triangles), 2) light smokers (blue squares), and 3) moderate/heavy smokers (red circles).

## MEG3

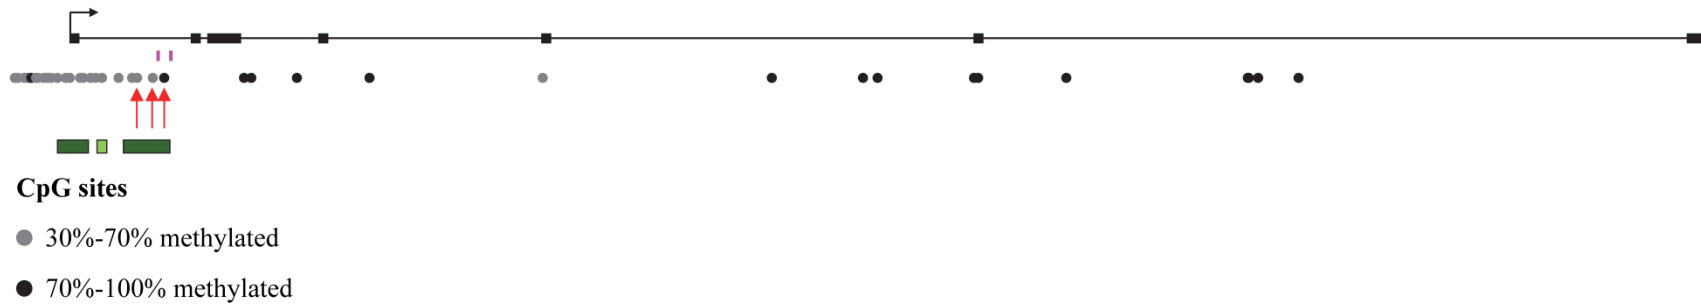

**Figure S5.** MEG3 gene diagram (GenBank accession number, NR\_002766.2). The pink rectangles mark the regions with putative CTCF binding sites as determined by Wylie, AA et al. 2000. The red arrows point to the three CpG sites we found that showed increased methylation ( $p < 0.0002$ ) in newborns of women who smoked during pregnancy. The green rectangles mark the CpG islands (GC content  $\geq 50\%$ , length  $> 200$  bp with islands  $< 300$  bp shown in light green, Observed/Expected CpGs  $> 0.6$ ). The average methylation observed in the CpG sites colored grey is 57% and the average methylation observed in the CpG sites colored black is 88%.

## References

- Bolstad BM, Irizarry RA, Astrand M, Speed TP. 2003. A comparison of normalization methods for high density oligonucleotide array data based on variance and bias. *Bioinformatics* 19:185-193.
- Davis S, Du P, Bilke S, Triche T, Bootwalla M. 2013. methylumi: Handle Illumina methylation data. R package version 2.6.1.
- Irizarry RA, Hobbs B, Collin F, Beazer-Barclay YD, Antonellis KJ, Scherf U, et al. 2003. Exploration, normalization, and summaries of high density oligonucleotide array probe level data. *Biostatistics* 4:249-264.
- Joubert BR, Haberg SE, Nilsen RM, Wang X, Vollset SE, Murphy SK, et al. 2012. 450K epigenome-wide scan identifies differential DNA methylation in newborns related to maternal smoking during pregnancy. *Environ Health Perspect* 120:1425-1431.
- Monick MM, Beach SR, Plume J, Sears R, Gerrard M, Brody GH, et al. 2012. Coordinated changes in AHRR methylation in lymphoblasts and pulmonary macrophages from smokers. *Am J Med Genet B Neuropsychiatr Genet* 159B:141-151.
- Price ME, Cotton AM, Lam LL, Farre P, Emberly E, Brown CJ, et al. 2013. Additional annotation enhances potential for biologically-relevant analysis of the Illumina Infinium HumanMethylation450 Beadchip array. *Epigenetics Chromatin* 6:4-19.
- Shenker NS, Polidoro S, van Veldhoven K, Sacerdote C, Ricceri F, Birrell MA, et al. 2012. Epigenome-wide association study in the European Prospective Investigation into Cancer and Nutrition (EPIC-Turin) identifies novel genetic loci associated with smoking. *Hum Mol Genet* 22:843-851.
- Trevor H, Tibshirani R, Narasimhan B, Chu G. 2014. Impute: Imputation for microarray data. R package version 1.34.0.
- Wylie AA, Murphy SK, Orton TC, Jirtle RL. 2000. Novel imprinted DLK1/GTL2 domain on human chromosome 14 contains motifs that mimic those implicated in IGF2/H19 regulation. *Genome Res* 10:1711-1718.
- Zeilinger S, Kuhnel B, Klopp N, Baurecht H, Kleinschmidt A, Gieger C, et al. 2013. Tobacco smoking leads to extensive genome-wide changes in DNA methylation. *PLoS One* 8:e63812.
